# Supplementary material
Source: Research Square preprint supplement (doi:10.21203/rs.3.rs-9610239/v1)
Supplement: Supplementary file 1 [file 7e4eb619dbe3bb17432e50a7.xlsx]

## Sheet: Sheet 1
Table S1. Protected river-length coverage across HydroBASINS Level 8 sub-basins in the Mekong River Basin.The first column provides the sub-basin identifier based on HydroBASINS Level 8. `riverL` represents the total river length (m) within each sub-basin. Columns `level_01` to `level_08` indicate the total river length (m) of each Strahler river order within the sub-basin. Columns `pa_riverL_01`…
BasinID	riverL	level_01	level_02	level_03	level_04	level_05	level_06	level_07	level_08	pa_riverL	pa_level_01	pa_level_02	pa_level_03	pa_level_04	pa_level_05	pa_level_06	pa_level_07	pa_level_08	Cover_total	Cover_01	Cover_02	Cover_03	Cover_04	Cover_05	Cover_06	Cover_07	Cover_08
4080016840	310392	178515	63589.6	68287.6	0	0	0	0	0	0	0	0	0	0	0	0	0	0	0	0	0	0	N/A	N/A	N/A	N/A	N/A
4080016900	194987	114880	30111.4	42769.4	7226.74	0	0	0	0	0	0	0	0	0	0	0	0	0	0	0	0	0	0	N/A	N/A	N/A	N/A
4080016910	24421.1	19600.3	4820.76	0	0	0	0	0	0	0	0	0	0	0	0	0	0	0	0	0	0	N/A	N/A	N/A	N/A	N/A	N/A
4080016920	274865	117371	78628.5	44693.3	34172.3	0	0	0	0	0	0	0	0	0	0	0	0	0	0	0	0	0	0	N/A	N/A	N/A	N/A
4080016930	54846.9	38204.2	16642.7	0	0	0	0	0	0	4227.15	3407.14	820.013	0	0	0	0	0	0	0.0770719	0.0891825	0.0492715	N/A	N/A	N/A	N/A	N/A	N/A
4080016940	1.13053e+06	549799	249308	116689	155713	59019.8	0	0	0	3528.04	2206.8	1321.25	0	0	0	0	0	0	0.00312071	0.00401382	0.00529967	0	0	0	N/A	N/A	N/A
4080016950	84213	53909	29653.5	650.497	0	0	0	0	0	0	0	0	0	0	0	0	0	0	0	0	0	0	N/A	N/A	N/A	N/A	N/A
4080016980	248950	120384	87739.4	40827.1	0	0	0	0	0	0	0	0	0	0	0	0	0	0	0	0	0	0	N/A	N/A	N/A	N/A	N/A
4080016990	90862.9	56543.3	25515.7	8803.86	0	0	0	0	0	0	0	0	0	0	0	0	0	0	0	0	0	0	N/A	N/A	N/A	N/A	N/A
4080017020	180202	81823.7	42538.8	9183.64	0	0	0	0	46655.4	0	0	0	0	0	0	0	0	0	0	0	0	0	N/A	N/A	N/A	N/A	0
4080017030	600022	369592	144760	62932.1	22738.3	0	0	0	0	0	0	0	0	0	0	0	0	0	0	0	0	0	0	N/A	N/A	N/A	N/A
4080017110	82201	33532	14691.3	0	776.102	33201.6	0	0	0	0	0	0	0	0	0	0	0	0	0	0	0	N/A	0	0	N/A	N/A	N/A
4080017120	46951.2	25941	21010.2	0	0	0	0	0	0	0	0	0	0	0	0	0	0	0	0	0	0	N/A	N/A	N/A	N/A	N/A	N/A
4080017150	346468	211562	46673.4	55895.3	32337.5	0	0	0	0	0	0	0	0	0	0	0	0	0	0	0	0	0	0	N/A	N/A	N/A	N/A
4080017160	601436	340463	128582	112208	20182.5	0	0	0	0	172973	96570.7	36902.6	39499.3	0	0	0	0	0	0.287599	0.283645	0.286997	0.352017	0	N/A	N/A	N/A	N/A
4080017240	482480	278166	81345	49455.5	73513.7	0	0	0	0	197232	111328	44178.3	21476.4	20249	0	0	0	0	0.408788	0.400222	0.543098	0.434258	0.275445	N/A	N/A	N/A	N/A
4080017250	458939	254306	133542	71090.5	0	0	0	0	0	359205	193757	104467	60980.4	0	0	0	0	0	0.782686	0.761905	0.78228	0.857786	N/A	N/A	N/A	N/A	N/A
4080017390	692335	339416	212660	77516	36163.8	26579.3	0	0	0	217579	94911.5	77996.5	35404.4	3806.06	5460.11	0	0	0	0.314268	0.279632	0.366766	0.456736	0.105245	0.205427	N/A	N/A	N/A
4080017400	54752.2	40283.1	14469.1	0	0	0	0	0	0	302.58	302.58	0	0	0	0	0	0	0	0.00552636	0.00751134	0	N/A	N/A	N/A	N/A	N/A	N/A
4080017430	633169	308231	179527	88322.3	57087.9	0	0	0	0	9672.77	9595.71	0	0	77.063	0	0	0	0	0.0152768	0.0311315	0	0	0.0013499	N/A	N/A	N/A	N/A
4080017440	247780	136387	75512.1	35881.3	0	0	0	0	0	218786	118237	64666.9	35881.3	0	0	0	0	0	0.882982	0.866925	0.856378	1	N/A	N/A	N/A	N/A	N/A
4080017490	713143	391938	162308	84149.7	55004	19742.8	0	0	0	54691.1	27227.3	9957.96	0	0	17505.9	0	0	0	0.0766903	0.0694682	0.0613523	0	0	0.886701	N/A	N/A	N/A
4080060240	390472	236689	116350	31587.8	5846.1	0	0	0	0	343578	205404	100741	31587.8	5846.1	0	0	0	0	0.879904	0.867821	0.865846	1	1	N/A	N/A	N/A	N/A
4080667790	571306	277706	227285	29692.3	36623.3	0	0	0	0	571306	277706	227285	29692.3	36623.3	0	0	0	0	1	1	1	1	1	N/A	N/A	N/A	N/A
4080667880	474688	263659	149305	61723.3	0	0	0	0	0	474688	263659	149305	61723.3	0	0	0	0	0	1	1	1	1	N/A	N/A	N/A	N/A	N/A
4080668740	153376	92573.2	33257.2	9616.82	17928.4	0	0	0	0	153376	92573.2	33257.2	9616.82	17928.4	0	0	0	0	1	1	1	1	1	N/A	N/A	N/A	N/A
4080668930	259545	155721	38772	65051.2	0	0	0	0	0	259545	155721	38772	65051.2	0	0	0	0	0	1	1	1	1	N/A	N/A	N/A	N/A	N/A
4080675030	289191	107497	113027	14637.5	54029	0	0	0	0	289191	107497	113027	14637.5	54029	0	0	0	0	1	1	1	1	1	N/A	N/A	N/A	N/A
4080675320	401993	181754	133202	30356.9	56679.1	0	0	0	0	401993	181754	133202	30356.9	56679.1	0	0	0	0	1	1	1	1	1	N/A	N/A	N/A	N/A
4080675870	3604.9	0	0	0	459.755	3145.14	0	0	0	3604.9	0	0	0	459.755	3145.14	0	0	0	1	N/A	N/A	N/A	1	1	N/A	N/A	N/A
4080676090	108199	59599.9	31093.1	17506.4	0	0	0	0	0	108199	59599.9	31093.1	17506.4	0	0	0	0	0	1	1	1	1	N/A	N/A	N/A	N/A	N/A
4080676750	298725	147188	78095.3	68387.3	5054.76	0	0	0	0	298725	147188	78095.3	68387.3	5054.76	0	0	0	0	1	1	1	1	1	N/A	N/A	N/A	N/A
4080676760	123782	40716.2	58469.5	11910.9	12685.4	0	0	0	0	123782	40716.2	58469.5	11910.9	12685.4	0	0	0	0	1	1	1	1	1	N/A	N/A	N/A	N/A
4080679040	203897	100854	31967.7	11677.8	0	59397.1	0	0	0	203897	100854	31967.7	11677.8	0	59397.1	0	0	0	1	1	1	1	N/A	1	N/A	N/A	N/A
4080679050	193952	80104.4	87705.9	23631.1	2510.18	0	0	0	0	193952	80104.4	87705.9	23631.1	2510.18	0	0	0	0	1	1	1	1	1	N/A	N/A	N/A	N/A
4080683140	136879	60598.3	13665	3347.13	756.641	58512	0	0	0	136879	60598.3	13665	3347.13	756.641	58512	0	0	0	1	1	1	1	1	1	N/A	N/A	N/A
4080683150	126904	63683.5	24789.7	38430.5	0	0	0	0	0	126904	63683.5	24789.7	38430.5	0	0	0	0	0	1	1	1	1	N/A	N/A	N/A	N/A	N/A
4080683740	100539	57742.8	12443.8	0	30352.6	0	0	0	0	100539	57742.8	12443.8	0	30352.6	0	0	0	0	1	1	1	N/A	1	N/A	N/A	N/A	N/A
4080683860	64194.1	36975.9	22435.9	4782.38	0	0	0	0	0	64194.1	36975.9	22435.9	4782.38	0	0	0	0	0	1	1	1	1	N/A	N/A	N/A	N/A	N/A
4080684900	72417.7	42529.2	27809.7	2078.76	0	0	0	0	0	72417.7	42529.2	27809.7	2078.76	0	0	0	0	0	1	1	1	1	N/A	N/A	N/A	N/A	N/A
4080685100	42708.9	18191.2	5231.02	237.138	19049.5	0	0	0	0	40261.1	18191.2	5231.02	0	16838.8	0	0	0	0	0.942685	1	1	0	0.88395	N/A	N/A	N/A	N/A
4080685110	27366.7	12122.4	2601.4	302.842	12340	0	0	0	0	27366.7	12122.4	2601.4	302.842	12340	0	0	0	0	1	1	1	1	1	N/A	N/A	N/A	N/A
4080685120	31610.4	17697.2	13913.2	0	0	0	0	0	0	31610.4	17697.2	13913.2	0	0	0	0	0	0	1	1	1	N/A	N/A	N/A	N/A	N/A	N/A
4080685250	17178.4	5671.65	0	244.94	0	11261.8	0	0	0	17178.4	5671.65	0	244.94	0	11261.8	0	0	0	1	1	N/A	1	N/A	1	N/A	N/A	N/A
4080685400	166827	96347	31161	39319.6	0	0	0	0	0	166827	96347	31161	39319.6	0	0	0	0	0	1	1	1	1	N/A	N/A	N/A	N/A	N/A
4080687190	210015	105801	36310.3	9241.35	231.66	58430.2	0	0	0	210015	105801	36310.3	9241.35	231.66	58430.2	0	0	0	1	1	1	1	1	1	N/A	N/A	N/A
4080687290	202894	113161	60084.7	8901.17	20746.5	0	0	0	0	202894	113161	60084.7	8901.17	20746.5	0	0	0	0	1	1	1	1	1	N/A	N/A	N/A	N/A
4080687300	6289.97	0	0	244.124	0	6045.85	0	0	0	6289.97	0	0	244.124	0	6045.85	0	0	0	1	N/A	N/A	1	N/A	1	N/A	N/A	N/A
4080687390	275764	122632	101652	32983.5	18496.8	0	0	0	0	275764	122632	101652	32983.5	18496.8	0	0	0	0	1	1	1	1	1	N/A	N/A	N/A	N/A
4080687680	59138.7	20214.6	19139.3	0	245.346	19539.4	0	0	0	59138.7	20214.6	19139.3	0	245.346	19539.4	0	0	0	1	1	1	N/A	1	1	N/A	N/A	N/A
4080687900	110190	44614.7	38486.6	27089	0	0	0	0	0	110190	44614.7	38486.6	27089	0	0	0	0	0	1	1	1	1	N/A	N/A	N/A	N/A	N/A
4080688050	175616	103898	47693	194.982	23829.4	0	0	0	0	175616	103898	47693	194.982	23829.4	0	0	0	0	1	1	1	1	1	N/A	N/A	N/A	N/A
4080688220	261642	143480	65355.7	21649.1	31156.7	0	0	0	0	0	0	0	0	0	0	0	0	0	0	0	0	0	0	N/A	N/A	N/A	N/A
4080688230	73467.4	18187.4	13750.4	41529.6	1.54783e-07	0	0	0	0	73467.4	18187.4	13750.4	41529.6	1.54783e-07	0	0	0	0	1	1	1	1	1	N/A	N/A	N/A	N/A
4080688340	244902	129954	75897.5	39051.5	0	0	0	0	0	0	0	0	0	0	0	0	0	0	0	0	0	0	N/A	N/A	N/A	N/A	N/A
4080690200	36710.4	19692	3948.47	203.886	12866	0	0	0	0	36710.4	19692	3948.47	203.886	12866	0	0	0	0	1	1	1	1	1	N/A	N/A	N/A	N/A
4080690510	203685	105935	52212.4	45537	0	0	0	0	0	114267	58774.9	10907.6	44584.4	0	0	0	0	0	0.560999	0.554818	0.208907	0.979083	N/A	N/A	N/A	N/A	N/A
4080691450	78019	33623.1	1532.9	0	245.351	42617.6	0	0	0	78019	33623.1	1532.9	0	245.351	42617.6	0	0	0	1	1	1	N/A	1	1	N/A	N/A	N/A
4080691460	66947.2	38937.8	14744.4	13265	0	0	0	0	0	66947.2	38937.8	14744.4	13265	0	0	0	0	0	1	1	1	1	N/A	N/A	N/A	N/A	N/A
4080691750	91485	49307.4	26183.3	4096.75	11897.6	0	0	0	0	91485	49307.4	26183.3	4096.75	11897.6	0	0	0	0	1	1	1	1	1	N/A	N/A	N/A	N/A
4080691960	295361	137537	86915.7	17643.1	53265.1	0	0	0	0	50598.9	20537.3	0	0	30061.6	0	0	0	0	0.171312	0.149322	0	0	0.564376	N/A	N/A	N/A	N/A
4080697110	122096	45834.8	39900	5.22475e-09	606.366	35755.1	0	0	0	122096	45834.8	39900	5.22475e-09	606.366	35755.1	0	0	0	1	1	1	1	1	1	N/A	N/A	N/A
4080697440	138140	60398.6	60742.9	16998.9	0	0	0	0	0	138140	60398.6	60742.9	16998.9	0	0	0	0	0	1	1	1	1	N/A	N/A	N/A	N/A	N/A
4080697620	113694	44181.3	40443.9	245.747	0	28823	0	0	0	113694	44181.3	40443.9	245.747	0	28823	0	0	0	1	1	1	1	N/A	1	N/A	N/A	N/A
4080697810	60212.7	38538.6	21674.1	0	0	0	0	0	0	60212.7	38538.6	21674.1	0	0	0	0	0	0	1	1	1	N/A	N/A	N/A	N/A	N/A	N/A
4080699270	11124.3	1621.6	224.601	0	0	9278.06	0	0	0	11124.3	1621.6	224.601	0	0	9278.06	0	0	0	1	1	1	N/A	N/A	1	N/A	N/A	N/A
4080699410	80178.9	56611.9	18906.7	4660.24	0	0	0	0	0	80178.9	56611.9	18906.7	4660.24	0	0	0	0	0	1	1	1	1	N/A	N/A	N/A	N/A	N/A
4080700840	84084	42072.3	14443.5	303.451	0	27264.7	0	0	0	84084	42072.3	14443.5	303.451	0	27264.7	0	0	0	1	1	1	1	N/A	1	N/A	N/A	N/A
4080701040	187055	89465.7	47887.9	49701.6	0	0	0	0	0	187055	89465.7	47887.9	49701.6	0	0	0	0	0	1	1	1	1	N/A	N/A	N/A	N/A	N/A
4080701360	300907	152705	53606	59667.1	34928.1	0	0	0	0	273095	143305	53514	59667.1	16608.9	0	0	0	0	0.907574	0.938441	0.998284	1	0.475518	N/A	N/A	N/A	N/A
4080701520	139195	57512.2	49991	303.721	31388.5	0	0	0	0	0	0	0	0	0	0	0	0	0	0	0	0	0	0	N/A	N/A	N/A	N/A
4080702680	536082	275347	127615	23091.4	0	110028	0	0	0	532003	275347	127615	23091.4	0	105949	0	0	0	0.992391	1	1	1	N/A	0.962928	N/A	N/A	N/A
4080702880	61203.4	23321.9	9108.09	196.481	0	28577	0	0	0	0	0	0	0	0	0	0	0	0	0	0	0	0	N/A	0	N/A	N/A	N/A
4080703390	169426	77097.5	62414	29914.7	0	0	0	0	0	14466.3	7951.85	6514.43	0	0	0	0	0	0	0.0853839	0.10314	0.104374	0	N/A	N/A	N/A	N/A	N/A
4080703540	44901.5	12801.5	24385.7	427.848	7286.53	0	0	0	0	0	0	0	0	0	0	0	0	0	0	0	0	0	0	N/A	N/A	N/A	N/A
4080704210	121378	57235.1	18161	192.96	0	45788.9	0	0	0	121378	57235.1	18161	192.96	0	45788.9	0	0	0	1	1	1	1	N/A	1	N/A	N/A	N/A
4080704220	21424.2	9944.79	0	0	499.94	10979.5	0	0	0	143.46	0	0	0	143.46	0	0	0	0	0.00669616	0	N/A	N/A	0.286955	0	N/A	N/A	N/A
4080704370	87672.3	36516.9	29545.4	21610	0	0	0	0	0	57154	25150.8	22600.1	9403.05	0	0	0	0	0	0.651905	0.688745	0.764929	0.435124	N/A	N/A	N/A	N/A	N/A
4080704380	94929.7	62123.5	27899.2	4907.02	0	0	0	0	0	0	0	0	0	0	0	0	0	0	0	0	0	0	N/A	N/A	N/A	N/A	N/A
4080704390	119271	70108.4	17915.7	31246.5	0	0	0	0	0	0	0	0	0	0	0	0	0	0	0	0	0	0	N/A	N/A	N/A	N/A	N/A
4080704680	319962	166035	102739	32451.9	18735.9	0	0	0	0	0	0	0	0	0	0	0	0	0	0	0	0	0	0	N/A	N/A	N/A	N/A
4080705050	32191.6	15250.4	6889.94	0	0	500.079	9551.22	0	0	15582.6	12160.2	1298.36	0	0	0	2123.96	0	0	0.484056	0.797372	0.188442	N/A	N/A	0	0.222375	N/A	N/A
4080705180	23139.4	10612.6	0	246.906	0	12280	1.54046e-07	0	0	2008.94	0	0	30.3442	0	1978.6	0	0	0	0.0868188	0	N/A	0.122898	N/A	0.161124	0	N/A	N/A
4080706380	147842	65091.7	37673.6	303.615	0	44773.4	0	0	0	147842	65091.7	37673.6	303.615	0	44773.4	0	0	0	1	1	1	1	N/A	1	N/A	N/A	N/A
4080706630	55756.1	32356.7	23399.3	0	0	0	0	0	0	55756.1	32356.7	23399.3	0	0	0	0	0	0	1	1	1	N/A	N/A	N/A	N/A	N/A	N/A
4080706840	34394	16262.5	303.856	0	0	17827.6	0	0	0	34394	16262.5	303.856	0	0	17827.6	0	0	0	1	1	1	N/A	N/A	1	N/A	N/A	N/A
4080706850	40537.8	16696.8	23841	0	0	0	0	0	0	40537.8	16696.8	23841	0	0	0	0	0	0	1	1	1	N/A	N/A	N/A	N/A	N/A	N/A
4080709130	54814.9	26365.7	9013.01	0	0	208.098	19228.2	0	0	0	0	0	0	0	0	0	0	0	0	0	0	N/A	N/A	0	0	N/A	N/A
4080709300	38443.6	23332	15111.6	0	0	0	0	0	0	0	0	0	0	0	0	0	0	0	0	0	0	N/A	N/A	N/A	N/A	N/A	N/A
4080711440	16263.5	7261.9	196.817	0	0	0	8804.81	0	0	0	0	0	0	0	0	0	0	0	0	0	0	N/A	N/A	N/A	0	N/A	N/A
4080711580	41674.7	20328.2	9441.65	11904.9	0	0	0	0	0	0	0	0	0	0	0	0	0	0	0	0	0	0	N/A	N/A	N/A	N/A	N/A
4080713300	347490	174871	95730.2	76889.3	0	0	0	0	0	339787	174871	94708	70208.8	0	0	0	0	0	0.977833	1	0.989322	0.913115	N/A	N/A	N/A	N/A	N/A
4080713390	239558	116756	48732.9	9968.91	0	64100.2	0	0	0	16256.4	14768.9	793.264	0	0	694.282	0	0	0	0.0678599	0.126493	0.0162778	0	N/A	0.0108312	N/A	N/A	N/A
4080715800	50709.8	25557.8	14656.8	10495.2	0	0	0	0	0	0	0	0	0	0	0	0	0	0	0	0	0	0	N/A	N/A	N/A	N/A	N/A
4080715810	145978	64604.7	31776.5	49597.2	0	0	0	0	0	145978	64604.7	31776.5	49597.2	0	0	0	0	0	1	1	1	1	N/A	N/A	N/A	N/A	N/A
4080715910	39266.5	17385	21881.6	0	0	0	0	0	0	0	0	0	0	0	0	0	0	0	0	0	0	N/A	N/A	N/A	N/A	N/A	N/A
4080715920	184575	99993	29133.2	55448.9	0	0	0	0	0	0	0	0	0	0	0	0	0	0	0	0	0	0	N/A	N/A	N/A	N/A	N/A
4080718810	111922	53148	20351.9	192.307	0	0	38229.4	0	0	0	0	0	0	0	0	0	0	0	0	0	0	0	N/A	N/A	0	N/A	N/A
4080718820	494168	249521	120291	72050.6	52304.9	0	0	0	0	0	0	0	0	0	0	0	0	0	0	0	0	0	0	N/A	N/A	N/A	N/A
4080720320	10601.3	2600.54	0	0	304.432	0	7696.34	0	0	0	0	0	0	0	0	0	0	0	0	0	N/A	N/A	0	N/A	0	N/A	N/A
4080720500	32503	20046	4943.37	7513.57	0	0	0	0	0	0	0	0	0	0	0	0	0	0	0	0	0	0	N/A	N/A	N/A	N/A	N/A
4080725930	195127	101670	19034.2	662.136	73760.6	0	0	0	0	85821.9	27633.4	7296.37	478.684	50413.4	0	0	0	0	0.439826	0.271796	0.383329	0.722939	0.683472	N/A	N/A	N/A	N/A
4080726290	58280.6	36949.9	20540.9	789.771	0	0	0	0	0	0	0	0	0	0	0	0	0	0	0	0	0	0	N/A	N/A	N/A	N/A	N/A
4080727350	7176.95	1310.41	0	429.22	5437.32	0	0	0	0	0	0	0	0	0	0	0	0	0	0	0	N/A	0	0	N/A	N/A	N/A	N/A
4080727660	392702	203331	74069.7	98952.7	16349	0	0	0	0	216210	115696	37182.9	63330.8	0	0	0	0	0	0.55057	0.569006	0.501999	0.640011	0	N/A	N/A	N/A	N/A
4080730280	445584	209642	125881	12584.7	0	97476.6	0.00515627	0	0	16311.5	9033.01	7278.47	0	0	0	0	0	0	0.0366069	0.0430877	0.0578204	0	N/A	0	0	N/A	N/A
4080730290	132701	70956.4	15942.5	242.08	0	0	45560.1	0	0	0	0	0	0	0	0	0	0	0	0	0	0	0	N/A	N/A	0	N/A	N/A
4080745580	261718	137044	40681.5	6719.03	0	219.192	77055	0	0	0	0	0	0	0	0	0	0	0	0	0	0	0	N/A	0	0	N/A	N/A
4080745590	100396	39668	23412.5	10742.9	187.601	26384.6	0.00488921	0	0	0	0	0	0	0	0	0	0	0	0	0	0	0	0	0	0	N/A	N/A
4080746370	2528.56	0	0	0	0	231.656	2296.9	0	0	0	0	0	0	0	0	0	0	0	0	N/A	N/A	N/A	N/A	0	0	N/A	N/A
4080746500	491452	255966	94709.6	0	663.711	140113	0	0	0	0	0	0	0	0	0	0	0	0	0	0	0	N/A	0	0	N/A	N/A	N/A
4080746510	289811	128755	75883.7	56021.5	29150.9	0	0	0	0	0	0	0	0	0	0	0	0	0	0	0	0	0	0	N/A	N/A	N/A	N/A
4080746660	34818.6	18778.6	8192.43	291.091	0	7556.56	0	0	0	0	0	0	0	0	0	0	0	0	0	0	0	0	N/A	0	N/A	N/A	N/A
4080747600	130661	73718.8	5107.35	51835	0	0	0	0	0	0	0	0	0	0	0	0	0	0	0	0	0	0	N/A	N/A	N/A	N/A	N/A
4080747730	93890.1	47314.3	18080.2	0	537.45	27958.1	0	0	0	0	0	0	0	0	0	0	0	0	0	0	0	N/A	0	0	N/A	N/A	N/A
4080748060	123920	72638	20372.9	30908.9	0	0	0	0	0	4844.87	4844.87	0	0	0	0	0	0	0	0.0390968	0.0666989	0	0	N/A	N/A	N/A	N/A	N/A
4080748070	271969	139635	61266.7	14142.7	56924.1	0	0	0	0	56847	29758.3	17614.6	9474.06	0	0	0	0	0	0.20902	0.213115	0.287507	0.66989	0	N/A	N/A	N/A	N/A
4080750020	10715	0	0	430.523	10284.5	0	0	0	0	0	0	0	0	0	0	0	0	0	0	N/A	N/A	0	0	N/A	N/A	N/A	N/A
4080750290	224544	103942	50681.7	40463.8	29457	0	0	0	0	318.752	318.752	0	0	0	0	0	0	0	0.00141955	0.00306664	0	0	0	N/A	N/A	N/A	N/A
4080766740	372606	162139	95509.2	13261.5	0	188.648	101508	0	0	0	0	0	0	0	0	0	0	0	0	0	0	0	N/A	0	0	N/A	N/A
4080767050	187697	91889.5	61752.9	34054.8	0	0	0	0	0	0	0	0	0	0	0	0	0	0	0	0	0	0	N/A	N/A	N/A	N/A	N/A
4080773190	103282	58557.8	8641.97	431.692	0	0	35650.2	0	0	0	0	0	0	0	0	0	0	0	0	0	0	0	N/A	N/A	0	N/A	N/A
4080773200	204719	103407	39671.5	43642.7	17997.5	0	0	0	0	0	0	0	0	0	0	0	0	0	0	0	0	0	0	N/A	N/A	N/A	N/A
4080782770	139760	69231.5	25278.2	4449.51	231.653	0	40568.8	0	0	41825.3	19418.8	5716.97	4449.51	0	0	12240	0	0	0.299266	0.280491	0.226162	1	0	N/A	0.30171	N/A	N/A
4080782900	190002	86706.3	61085.8	13886.1	28324.1	0	0	0	0	0	0	0	0	0	0	0	0	0	0	0	0	0	0	N/A	N/A	N/A	N/A
4080812830	604700	333955	135386	5208.98	256.053	0	129894	0	0	410034	185555	99419.4	5208.98	0	0	119851	0	0	0.678078	0.555629	0.73434	1	0	N/A	0.922679	N/A	N/A
4080812990	103649	60831.1	18547.1	24270.7	0	0	0	0	0	40343.2	19266.4	4009.24	17067.6	0	0	0	0	0	0.38923	0.316719	0.216166	0.703219	N/A	N/A	N/A	N/A	N/A
4080818380	74773.1	51016.1	0	255.717	0	0	23501.2	0	0	72127.6	48370.7	0	255.717	0	0	23501.2	0	0	0.964621	0.948145	N/A	1	N/A	N/A	1	N/A	N/A
4080818390	62991	31516.9	25157.9	6316.24	0	0	0	0	0	62991	31516.9	25157.9	6316.24	0	0	0	0	0	1	1	1	1	N/A	N/A	N/A	N/A	N/A
4080823900	132923	85328.4	18087.6	6031.16	0	0	23476.1	0	0	118399	70803.9	18087.6	6031.16	0	0	23476.1	0	0	0.89073	0.829782	1	1	N/A	N/A	1	N/A	N/A
4080824050	67855.7	38540.3	7511.8	18343.9	3459.79	0	0	0	0	57879.7	28564.2	7511.8	18343.9	3459.79	0	0	0	0	0.852982	0.741153	1	1	1	N/A	N/A	N/A	N/A
4080849850	752163	458646	146422	26055.3	215.152	0	120825	0	0	171711	133533	30259.7	0	215.152	0	7703.39	0	0	0.22829	0.291146	0.206661	0	1	N/A	0.0637567	N/A	N/A
4080850070	239030	131653	57696.8	42459.4	7220.82	0	0	0	0	27343.9	18353.7	8990.11	0	0	0	0	0	0	0.114395	0.13941	0.155817	0	0	N/A	N/A	N/A	N/A
4080861460	241987	102161	81878.4	5575.33	205.761	0	52166.3	0	0	123462	47313.8	54032.4	5575.33	0	0	16540.4	0	0	0.510201	0.463129	0.65991	1	0	N/A	0.317071	N/A	N/A
4080861470	366207	191291	94543.6	50268.8	30103.8	0	0	0	0	88202.9	51105.9	12614.7	16419	8063.19	0	0	0	0	0.240855	0.267163	0.133428	0.326625	0.267846	N/A	N/A	N/A	N/A
4080863620	24967.6	12966.7	3305.74	0	310.273	0	8384.95	0	0	14011.7	12966.7	1045.04	0	0	0	0	0	0	0.561195	1	0.316128	N/A	0	N/A	0	N/A	N/A
4080863800	46103.2	25686.1	20417.1	0	0	0	0	0	0	43090.4	25686.1	17404.2	0	0	0	0	0	0	0.934651	1	0.852436	N/A	N/A	N/A	N/A	N/A	N/A
4080870310	152083	92484.1	28744.8	0	0	0	30853.6	0	0	55076.6	41587.5	13489.1	0	0	0	0	0	0	0.362149	0.449672	0.469271	N/A	N/A	N/A	0	N/A	N/A
4080870320	44451.8	19278.9	12806.5	12366.4	0	0	0	0	0	17862.9	8976.81	6966.98	1919.08	0	0	0	0	0	0.401848	0.46563	0.544018	0.155185	N/A	N/A	N/A	N/A	N/A
4080877140	117474	69834.5	15380.4	310.638	0	0	31948.4	0	0	48388.7	37687.5	5926	0	0	0	4775.2	0	0	0.411911	0.539669	0.385297	0	N/A	N/A	0.149466	N/A	N/A
4080877150	61513	35476.3	15775.4	10261.2	0	0	0	0	0	55226.3	29393.8	15571.3	10261.2	0	0	0	0	0	0.8978	0.828548	0.987059	1	N/A	N/A	N/A	N/A	N/A
4080884980	163568	124880	3941.17	310.909	0	0	34435.8	0	0	68835	52370.8	3941.17	310.909	0	0	12212.2	0	0	0.420835	0.419369	1	1	N/A	N/A	0.354637	N/A	N/A
4080885150	63289	33398	6562.61	23328.5	0	0	0	0	0	46826.2	26693.4	6562.61	13570.2	0	0	0	0	0	0.739878	0.799251	1	0.581702	N/A	N/A	N/A	N/A	N/A
4080887700	266041	160725	42021.3	56270	7024.37	0	0	0	0	21344.6	21344.6	0	0	0	0	0	0	0	0.0802307	0.132802	0	0	0	N/A	N/A	N/A	N/A
4080887710	444252	255678	84243	63234.6	41096.6	0	0	0	0	56764	32267.6	3671.55	15868.1	4956.74	0	0	0	0	0.127774	0.126204	0.0435829	0.25094	0.120612	N/A	N/A	N/A	N/A
4080905860	378063	258292	34119.7	207.803	0	0	85442.9	0	0	1889.63	1889.63	0	0	0	0	0	0	0	0.00499819	0.00731585	0	0	N/A	N/A	0	N/A	N/A
4080905950	686920	389524	132385	77708.6	87302.2	0	0	0	0	163245	98119.6	37395.8	27729.3	0	0	0	0	0	0.237647	0.251896	0.282477	0.356837	0	N/A	N/A	N/A	N/A
4080906410	463554	274397	86231.2	10823.3	602.396	91500	0	0	0	40289.9	14247.9	10501.5	1247.26	0	14293.2	0	0	0	0.0869152	0.0519245	0.121783	0.115239	0	0.15621	N/A	N/A	N/A
4080906600	735849	395833	171610	74436.9	69603.4	24365.4	0	0	0	349259	144013	88122.4	56430.3	58211.8	2481.43	0	0	0	0.474634	0.363822	0.513503	0.758096	0.836335	0.101842	N/A	N/A	N/A
4080909370	31454.8	15194.9	2920.31	0	0	453.022	12886.6	0	0	0	0	0	0	0	0	0	0	0	0	0	0	N/A	N/A	0	0	N/A	N/A
4080909500	425942	252181	92190.9	81569.8	0	0	0	0	0	0	0	0	0	0	0	0	0	0	0	0	0	0	N/A	N/A	N/A	N/A	N/A
4080915620	132193	60122.4	8014.15	32076.3	0	0	31979.7	0	0	0	0	0	0	0	0	0	0	0	0	0	0	0	N/A	N/A	0	N/A	N/A
4080915920	123944	72985.2	26271.2	24687.7	0	0	0	0	0	0	0	0	0	0	0	0	0	0	0	0	0	0	N/A	N/A	N/A	N/A	N/A
4080922260	464332	245400	93187.9	28343.6	262.514	0	97137.8	0	0	17938.7	17480.3	458.459	0	0	0	0	0	0	0.0386335	0.0712318	0.00491972	0	0	N/A	0	N/A	N/A
4080922270	360896	211671	69926.6	79297.8	0	0	0	0	0	24672.4	14493.8	7075.48	3103.19	0	0	0	0	0	0.0683644	0.068473	0.101184	0.0391333	N/A	N/A	N/A	N/A	N/A
4080933180	186196	84493.5	29264.4	1158.28	0	0	71279.6	0	0	0	0	0	0	0	0	0	0	0	0	0	0	0	N/A	N/A	0	N/A	N/A
4080933190	483573	273032	79919.1	25357.5	0	0	105265	0	0	495.55	495.55	0	0	0	0	0	0	0	0.00102477	0.00181499	0	0	N/A	N/A	0	N/A	N/A
4080938280	83479	37069.1	12057.1	231.66	34121.2	0	0	0	0	0	0	0	0	0	0	0	0	0	0	0	0	0	0	N/A	N/A	N/A	N/A
4080938290	319162	183612	63465.6	421.029	0.0100214	0	532.211	71131.5	0	41644.8	29198.6	12446.2	0	0	0	0	0	0	0.130482	0.159023	0.19611	0	0	N/A	0	0	N/A
4080939020	48008.3	25263.7	18780.6	3964.03	0	0	0	0	0	0	0	0	0	0	0	0	0	0	0	0	0	0	N/A	N/A	N/A	N/A	N/A
4080939190	9129.73	2945.66	0	241.586	5942.48	0	0	0	0	0	0	0	0	0	0	0	0	0	0	0	N/A	0	0	N/A	N/A	N/A	N/A
4080940330	42463.4	26833.5	3950.72	11679.2	0	0	0	0	0	0	0	0	0	0	0	0	0	0	0	0	0	0	N/A	N/A	N/A	N/A	N/A
4080940480	25137.8	5161.02	8254.54	313.273	11409	0	0	0	0	0	0	0	0	0	0	0	0	0	0	0	0	0	0	N/A	N/A	N/A	N/A
4080940790	126800	83781.9	37747.9	5269.72	0	0	0	0	0	0	0	0	0	0	0	0	0	0	0	0	0	0	N/A	N/A	N/A	N/A	N/A
4080941110	177774	97235.6	33885.5	626.556	46026.4	0	0	0	0	0	0	0	0	0	0	0	0	0	0	0	0	0	0	N/A	N/A	N/A	N/A
4080941300	221432	142579	27105.7	51748	0	0	0	0	0	0	0	0	0	0	0	0	0	0	0	0	0	0	N/A	N/A	N/A	N/A	N/A
4080941570	97279.6	55590.9	15348.6	26340.1	0	0	0	0	0	0	0	0	0	0	0	0	0	0	0	0	0	0	N/A	N/A	N/A	N/A	N/A
4080948680	200672	124541	25513.4	2342.73	313.169	0	0	47961.6	0	26753.6	21274.9	5107.34	371.351	0	0	0	0	0	0.13332	0.170827	0.200182	0.158513	0	N/A	N/A	0	N/A
4080948910	128769	58996	24474.9	29725.7	15572.8	0	0	0	0	6879.53	5106.93	1772.6	0	0	0	0	0	0	0.0534251	0.0865639	0.0724251	0	0	N/A	N/A	N/A	N/A
4080952740	145972	67248.3	11461	37698.3	470.88	0	0	29093.8	0	0	0	0	0	0	0	0	0	0	0	0	0	0	0	N/A	N/A	0	N/A
4080952930	130121	80102.1	21895.2	28123.2	0	0	0	0	0	0	0	0	0	0	0	0	0	0	0	0	0	0	N/A	N/A	N/A	N/A	N/A
4080962820	294812	198288	37575.1	58948.9	0	0	0	0	0	0	0	0	0	0	0	0	0	0	0	0	0	0	N/A	N/A	N/A	N/A	N/A
4080962990	81092	52924.4	10227.5	17940.2	0	0	0	0	0	0	0	0	0	0	0	0	0	0	0	0	0	0	N/A	N/A	N/A	N/A	N/A
4080967240	150847	93989.8	17543.3	39313.8	0	0	0	0	0	0	0	0	0	0	0	0	0	0	0	0	0	0	N/A	N/A	N/A	N/A	N/A
4080967250	110131	58426.2	5552.16	22078.8	24073.5	0	0	0	0	0	0	0	0	0	0	0	0	0	0	0	0	0	0	N/A	N/A	N/A	N/A
4080967590	450658	236987	113308	25318.1	0	0	0	75044.4	0	227928	120853	50261.6	15120.2	0	0	0	41693.2	0	0.505768	0.509957	0.443584	0.59721	N/A	N/A	N/A	0.55558	N/A
4080967750	430880	243154	84796.2	68151.3	34777.9	0	0	0	0	13451.9	9822.92	0	3628.99	0	0	0	0	0	0.0312196	0.0403979	0	0.053249	0	N/A	N/A	N/A	N/A
4080971860	289424	150816	76046.7	53427.4	9133.54	0	0	0	0	183831	69711.3	63453.2	44561	6105.43	0	0	0	0	0.635161	0.462226	0.834398	0.834048	0.668463	N/A	N/A	N/A	N/A
4080972030	210997	118587	37686.6	23459.7	31262.9	0	0	0	0	34300	29773.7	4526.28	0	0	0	0	0	0	0.162562	0.25107	0.120103	0	0	N/A	N/A	N/A	N/A
4080972580	433307	265499	103843	63964.5	0	0	0	0	0	33627.1	32154.4	926.633	546.044	0	0	0	0	0	0.0776057	0.121109	0.00892338	0.00853667	N/A	N/A	N/A	N/A	N/A
4080972650	113614	68827.8	13161.9	314.458	0	31309.7	0	0	0	7559.06	4597.21	2961.85	0	0	0	0	0	0	0.0665328	0.0667929	0.225032	0	N/A	0	N/A	N/A	N/A
4080972890	10013.9	1796.08	0	4.95484e-08	455.642	7762.19	0	0	0	0	0	0	0	0	0	0	0	0	0	0	N/A	0	0	0	N/A	N/A	N/A
4080972990	215959	99733.5	79022.1	37203.6	0	0	0	0	0	0	0	0	0	0	0	0	0	0	0	0	0	0	N/A	N/A	N/A	N/A	N/A
4080976600	104076	48280.9	22160.9	2925.23	0	30708.7	0	0	0	0	0	0	0	0	0	0	0	0	0	0	0	0	N/A	0	N/A	N/A	N/A
4080976610	342805	179475	76912.5	39526.8	212.362	0	0	46678.5	0	0	0	0	0	0	0	0	0	0	0	0	0	0	0	N/A	N/A	0	N/A
4080977110	104530	60334	9972.92	231.66	0	33991.1	0	0	0	0	0	0	0	0	0	0	0	0	0	0	0	0	N/A	0	N/A	N/A	N/A
4080977240	250592	143044	82040.1	25507.6	0	0	0	0	0	0	0	0	0	0	0	0	0	0	0	0	0	0	N/A	N/A	N/A	N/A	N/A
4080981970	485113	247663	139217	13491.9	84740.9	0	0	0	0	50894.2	20545.6	16358.8	4500.56	9489.12	0	0	0	0	0.104912	0.0829581	0.117506	0.333575	0.111978	N/A	N/A	N/A	N/A
4080981980	542654	318047	116118	43300.9	65188.1	0	0	0	0	0	0	0	0	0	0	0	0	0	0	0	0	0	0	N/A	N/A	N/A	N/A
4080985650	66077.2	26876.9	16920.5	0	546.477	21733.4	0	0	0	0	0	0	0	0	0	0	0	0	0	0	0	N/A	0	0	N/A	N/A	N/A
4080985820	553439	287929	146364	65330.1	53816.1	0	0	0	0	33721.8	23442	10279.9	0	0	0	0	0	0	0.0609315	0.0814159	0.0702351	0	0	N/A	N/A	N/A	N/A
4080986490	653835	312960	165660	109087	0	211.056	0	65917	0	38043.3	8471.09	7250.93	16201	0	3.44439e-08	0	6120.27	0	0.0581849	0.0270676	0.04377	0.148515	N/A	1.63199e-10	N/A	0.0928481	N/A
4080986500	142148	62402.1	29999.5	9732.66	473.028	39540.2	0	0	0	53442.8	17294	13178.2	0	0	22970.5	0	0	0	0.375967	0.277138	0.439281	0	0	0.58094	N/A	N/A	N/A
4080990840	90534.4	62999	5736.13	0	0	315.021	0	21484.3	0	78079.1	50543.7	5736.12	0	0	315.021	0	21484.3	0	0.862425	0.802294	0.999999	N/A	N/A	1	N/A	1	N/A
4080990940	603905	303539	170342	39037.8	55478.6	35507.2	0	0	0	91849.2	40919.2	26382.4	0	0	24547.6	0	0	0	0.152092	0.134807	0.154879	0	0	0.69134	N/A	N/A	N/A
4080999280	496889	271783	116047	38995.1	12411.4	268.598	0	57383.6	0	63891.7	27313.5	14552.2	743.153	0	268.598	0	21014.3	0	0.128583	0.100497	0.125399	0.0190576	0	1	N/A	0.366208	N/A
4080999290	162029	77285.2	29477.9	33593.8	21671.9	0	0	0	0	14767.4	8737.99	0	0	6029.46	0	0	0	0	0.0911409	0.113062	0	0	0.278216	N/A	N/A	N/A	N/A
4081000250	357885	198968	84357.1	31845.4	42714.2	0	0	0	0	205910	94913.6	57344.5	12681.6	40970.1	0	0	0	0	0.575352	0.477028	0.679784	0.398223	0.959169	N/A	N/A	N/A	N/A
4081000260	986992	549007	247012	95481.8	95491.6	0	0	0	0	68702.7	24339.1	23626.5	20737.2	0	0	0	0	0	0.0696081	0.0443329	0.095649	0.217185	0	N/A	N/A	N/A	N/A
4081000320	29194	18309.9	0	0	315.56	0	0	10568.6	0	7684.89	2037.44	0	0	223.48	0	0	5423.97	0	0.263235	0.111276	N/A	N/A	0.708199	N/A	N/A	0.513216	N/A
4081000530	310677	145532	94346.6	32613.6	38185.2	0	0	0	0	11400.3	5408.61	5959.03	0	32.6389	0	0	0	0	0.0366949	0.0371644	0.063161	0	0.000854752	N/A	N/A	N/A	N/A
4081003150	324462	165274	98350.7	16773.5	44064.1	0	0	0	0	694.537	0	694.537	0	0	0	0	0	0	0.00214058	0	0.00706184	0	0	N/A	N/A	N/A	N/A
4081003160	211461	109993	48628.1	38441.7	14398.4	0	0	0	0	0	0	0	0	0	0	0	0	0	0	0	0	0	0	N/A	N/A	N/A	N/A
4081004390	108870	38521.3	41438.8	28910.3	0	4.80681e-08	0	0	0	99515.4	34036.3	36568.9	28910.3	0	4.80681e-08	0	0	0	0.914073	0.883572	0.882479	1	N/A	1	N/A	N/A	N/A
4081004400	127174	63477.5	29298.7	2548.81	514.919	31334.3	0	0	0	36343.1	8197.61	7858.53	0	0	20287	0	0	0	0.285774	0.129142	0.268221	0	0	0.647436	N/A	N/A	N/A
4081004850	117991	66812.5	19117.2	18828.7	13232.8	0	0	0	0	0	0	0	0	0	0	0	0	0	0	0	0	0	0	N/A	N/A	N/A	N/A
4081004860	257590	148799	60532	48259.3	0	0	0	0	0	0	0	0	0	0	0	0	0	0	0	0	0	0	N/A	N/A	N/A	N/A	N/A
4081004990	392923	201354	124875	27692.2	39002.5	0	0	0	0	114029	49782.2	35335.1	10147.2	18764.9	0	0	0	0	0.290208	0.247237	0.282964	0.366429	0.481121	N/A	N/A	N/A	N/A
4081005080	179411	88362	36419.6	9471.38	45157.6	0	0	0	0	59064.3	24830.6	6628.5	908.591	26696.6	0	0	0	0	0.329213	0.28101	0.182004	0.0959302	0.591188	N/A	N/A	N/A	N/A
4081006500	132870	69304.1	23211.5	14437.9	25916.1	0	0	0	0	0	0	0	0	0	0	0	0	0	0	0	0	0	0	N/A	N/A	N/A	N/A
4081006700	97227.7	44054.1	36008.7	17164.9	0	0	0	0	0	0	0	0	0	0	0	0	0	0	0	0	0	0	N/A	N/A	N/A	N/A	N/A
4081007260	274485	103897	77371.1	26407.7	13486.8	0	0	53322.4	0	270134	100389	77371.1	26407.7	13407	0	0	52559.8	0	0.984149	0.966231	1	1	0.99408	N/A	N/A	0.985698	N/A
4081007420	544869	287139	108718	70842.1	78169.4	0	0	1.32513e-07	0	66894.3	30262.4	10021.6	7508.54	19101.8	0	0	1.32513e-07	0	0.122771	0.105393	0.0921794	0.10599	0.244364	N/A	N/A	1	N/A
4081008200	190359	90401.7	42464.4	18325.7	5.63966e-08	39167	0	0	0	6428.41	5870.46	0	219.239	0	338.713	0	0	0	0.0337699	0.0649374	0	0.0119635	0	0.00864794	N/A	N/A	N/A
4081008210	165513	93663.9	31198.3	11013.2	29637.2	0	0	0	0	0	0	0	0	0	0	0	0	0	0	0	0	0	0	N/A	N/A	N/A	N/A
4081009620	107926	50719.1	27843.8	29363.4	0.00554981	0	0	0	0	0	0	0	0	0	0	0	0	0	0	0	0	0	0	N/A	N/A	N/A	N/A
4081009630	836780	452890	232365	57277.8	94247.4	0	0	0	0	0	0	0	0	0	0	0	0	0	0	0	0	0	0	N/A	N/A	N/A	N/A
4081010070	93517.2	35526.5	27031.9	8553.2	315.95	22089.6	0	0	0	37667	12447.5	14732.9	3462.28	0	7024.4	0	0	0	0.402782	0.350372	0.545018	0.404794	0	0.317995	N/A	N/A	N/A
4081010170	214790	113214	47999.8	25809.9	27766.6	0	0	0	0	7752.33	3845.15	0	0	3907.18	0	0	0	0	0.0360926	0.0339637	0	0	0.140715	N/A	N/A	N/A	N/A
4081010870	168361	98590.7	42631	27139	0	0	0	0	0	0	0	0	0	0	0	0	0	0	0	0	0	0	N/A	N/A	N/A	N/A	N/A
4081011110	416101	227315	85686.7	30167.1	555.011	72377.3	0	0	0	0	0	0	0	0	0	0	0	0	0	0	0	0	0	0	N/A	N/A	N/A
4081011520	40020	21578	1264.24	0	214.968	16962.9	0	5.82816e-08	0	0	0	0	0	0	0	0	0	0	0	0	0	N/A	0	0	N/A	0	N/A
4081011680	271420	131505	56767.3	25554.8	195.681	0	0	57396.9	0	100370	24812.2	32323.1	10092.8	195.681	0	0	32946.5	0	0.369796	0.188678	0.569396	0.394946	1	N/A	N/A	0.574011	N/A
4081012160	412876	213231	103611	49256.4	465.372	46312.1	0	0	0	273681	138297	73866.5	34195	465.372	26856.5	0	0	0	0.662865	0.64858	0.712923	0.694223	1	0.579903	N/A	N/A	N/A
4081012230	286148	149099	66684.4	29848.8	40515.5	0	0	0	0	0	0	0	0	0	0	0	0	0	0	0	0	0	0	N/A	N/A	N/A	N/A
4081014260	41534.7	25060.2	6235.96	4.82045e-08	531.468	9707.07	0	0	0	0	0	0	0	0	0	0	0	0	0	0	0	0	0	0	N/A	N/A	N/A
4081014270	82570.8	38113.4	25462.8	18994.7	0	0	0	0	0	0	0	0	0	0	0	0	0	0	0	0	0	0	N/A	N/A	N/A	N/A	N/A
4081014470	122081	56058.9	33056.3	211.045	32754.4	0	0	0	0	0	0	0	0	0	0	0	0	0	0	0	0	0	0	N/A	N/A	N/A	N/A
4081014590	204514	111453	45764	29305.5	17991.8	0	0	0	0	0	0	0	0	0	0	0	0	0	0	0	0	0	0	N/A	N/A	N/A	N/A
4081015660	301244	166350	54111.7	56344.4	270.303	24167.5	0	0	0	0	0	0	0	0	0	0	0	0	0	0	0	0	0	0	N/A	N/A	N/A
4081015860	590059	317506	109993	107664	12119.9	42776.4	0	0	0	184.882	184.882	0	0	0	0	0	0	0	0.000313329	0.000582296	0	0	0	0	N/A	N/A	N/A
4081016170	129060	69751.6	31541.8	21930.9	5835.86	0	0	0	0	35946.2	25599.4	10346.8	0	0	0	0	0	0	0.278523	0.367008	0.328035	0	0	N/A	N/A	N/A	N/A
4081016380	101210	56070	23208.9	0	762.189	21169.1	0	0	0	9228.48	8187.48	1041	0	0	0	0	0	0	0.0911814	0.146023	0.0448535	N/A	0	0	N/A	N/A	N/A
4081016390	26696	15154.5	2961.11	0	0	591.969	7988.44	0	0	0	0	0	0	0	0	0	0	0	0	0	0	N/A	N/A	0	0	N/A	N/A
4081016400	263433	152948	56957.9	53526.8	0	0	0	0	0	164653	98276.7	37532.6	28843.6	0	0	0	0	0	0.625027	0.642548	0.658953	0.538862	N/A	N/A	N/A	N/A	N/A
4081017040	633673	335794	141007	70875.1	46388.2	215.058	0	39394.1	0	0	0	0	0	0	0	0	0	0	0	0	0	0	0	0	N/A	0	N/A
4081017050	19246.5	2045.02	0	0	445.505	16755.9	0	0.00506154	0	0	0	0	0	0	0	0	0	0	0	0	N/A	N/A	0	0	N/A	0	N/A
4081018410	292706	173369	48870.6	16654.4	0	53812.2	0	0	0	0	0	0	0	0	0	0	0	0	0	0	0	0	N/A	0	N/A	N/A	N/A
4081018580	331928	180866	98574.1	33894.3	18594	0	0	0	0	16242	10214.9	5929.19	97.9592	0	0	0	0	0	0.0489323	0.0564776	0.0601495	0.00289014	0	N/A	N/A	N/A	N/A
4081018590	87294.5	35590.6	17367.3	316.217	0	34020.4	0	0	0	0	0	0	0	0	0	0	0	0	0	0	0	0	N/A	0	N/A	N/A	N/A
4081018600	98502.3	55103.6	20926	22472.8	0	0	0	0	0	0	0	0	0	0	0	0	0	0	0	0	0	0	N/A	N/A	N/A	N/A	N/A
4081019350	232761	127173	50033.2	15942.5	39612.5	0	0	0	0	18247.1	6332.71	10905	1009.33	0	0	0	0	0	0.0783941	0.0497961	0.217956	0.0633108	0	N/A	N/A	N/A	N/A
4081019360	8621.13	5596.01	0	231.66	2793.45	0	0	0	0	0	0	0	0	0	0	0	0	0	0	0	N/A	0	0	N/A	N/A	N/A	N/A
4081019460	135840	58711	56918.3	231.656	0	0	19978.6	0	0	0	0	0	0	0	0	0	0	0	0	0	0	0	N/A	N/A	0	N/A	N/A
4081019470	60819.8	32842.9	13698.8	14278.2	0	0	0	0	0	0	0	0	0	0	0	0	0	0	0	0	0	0	N/A	N/A	N/A	N/A	N/A
4081019780	172835	85340.1	46656.8	40838	0	0	0	0	0	60270.2	29008.6	23361.6	7899.97	0	0	0	0	0	0.348715	0.339918	0.500711	0.193446	N/A	N/A	N/A	N/A	N/A
4081019790	93347.9	55999.8	8132.83	215.664	28999.6	0	0	0	0	29219.4	12405.8	0	0	16813.6	0	0	0	0	0.313016	0.221533	0	0	0.579787	N/A	N/A	N/A	N/A
4081019910	2509.06	0	0	316.484	0	0	2192.57	0	0	0	0	0	0	0	0	0	0	0	0	N/A	N/A	0	N/A	N/A	0	N/A	N/A
4081020060	164348	82875.8	38490	18523.6	24458.5	0	0	0	0	0	0	0	0	0	0	0	0	0	0	0	0	0	0	N/A	N/A	N/A	N/A
4081020150	427926	225779	121982	47446.4	32718.5	0	0	0	0	392916	199281	118463	42453.5	32718.5	0	0	0	0	0.918189	0.882638	0.971156	0.894768	1	N/A	N/A	N/A	N/A
4081020240	201244	104700	52601.4	43943.5	0.00506399	0	0	0	0	43376.3	22758.8	14109.6	6507.89	0	0	0	0	0	0.21554	0.217373	0.268236	0.148097	0	N/A	N/A	N/A	N/A
4081020580	60729.5	26650.6	14529.3	4238.08	0	15311.5	0	0	0	0	0	0	0	0	0	0	0	0	0	0	0	0	N/A	0	N/A	N/A	N/A
4081020650	459074	223929	103336	37939.6	3719.46	90149.6	0	0	0	0	0	0	0	0	0	0	0	0	0	0	0	0	0	0	N/A	N/A	N/A
4081022090	367268	193995	68770.3	14079.7	0	513.027	89910.4	5.41161e-08	0	0	0	0	0	0	0	0	0	0	0	0	0	0	N/A	0	0	0	N/A
4081022100	328660	178097	71708.1	14633.3	0	231.656	0	63990.8	0	0	0	0	0	0	0	0	0	0	0	0	0	0	N/A	0	N/A	0	N/A
4081023660	150128	85097.2	22621.2	11574.5	264.155	0	30571	0	0	0	0	0	0	0	0	0	0	0	0	0	0	0	0	N/A	0	N/A	N/A
4081023670	224400	117319	47647.7	42032.2	17401.1	0	0	0	0	0	0	0	0	0	0	0	0	0	0	0	0	0	0	N/A	N/A	N/A	N/A
4081025570	103169	51377.6	30232.9	0	0	0	234.247	21324.3	0	0	0	0	0	0	0	0	0	0	0	0	0	N/A	N/A	N/A	0	0	N/A
4081025630	84128.4	41919	16296.6	20135.4	5777.4	0	0	0	0	0	0	0	0	0	0	0	0	0	0	0	0	0	0	N/A	N/A	N/A	N/A
4081026210	121932	63775.1	36437.6	20869.9	849.761	0	0	0	0	0	0	0	0	0	0	0	0	0	0	0	0	0	0	N/A	N/A	N/A	N/A
4081026350	75479.6	30765.4	12751.3	244.077	31718.9	0	0	0	0	36165	14435.6	8052.76	235.764	13440.9	0	0	0	0	0.479136	0.469215	0.631526	0.96594	0.42375	N/A	N/A	N/A	N/A
4081026620	83124	50366.3	7489.67	5387.91	231.66	0	19648.5	0	0	0	0	0	0	0	0	0	0	0	0	0	0	0	0	N/A	0	N/A	N/A
4081026710	17843.1	8334.34	0	291.112	0	9217.64	0	0	0	0	0	0	0	0	0	0	0	0	0	0	N/A	0	N/A	0	N/A	N/A	N/A
4081027230	622554	322516	147238	70872	24288.9	57639.4	0	0	0	30750.1	14263.5	10047.9	6438.76	0	0	0	0	0	0.0493935	0.0442256	0.0682428	0.0908506	0	0	N/A	N/A	N/A
4081027320	65153.2	28778.1	18463.2	0	0	221.477	17690.5	0	0	0	0	0	0	0	0	0	0	0	0	0	0	N/A	N/A	0	0	N/A	N/A
4081027480	100625	48652	28022.7	0	532.932	23417.1	0	0	0	0	0	0	0	0	0	0	0	0	0	0	0	N/A	0	0	N/A	N/A	N/A
4081027560	54763.9	25352.1	11745.8	17666	0	0	0	0	0	2505.33	2234.18	271.148	0	0	0	0	0	0	0.0457479	0.0881261	0.0230847	0	N/A	N/A	N/A	N/A	N/A
4081027700	58209.6	29483.7	12034.5	0	216.064	0	0	16475.4	0	0	0	0	0	0	0	0	0	0	0	0	0	N/A	0	N/A	N/A	0	N/A
4081027890	35484.6	20837.2	14647.5	0	0	0	0	0	0	0	0	0	0	0	0	0	0	0	0	0	0	N/A	N/A	N/A	N/A	N/A	N/A
4081027950	436100	226247	121866	36903.2	51083.7	0	0	0	0	0	0	0	0	0	0	0	0	0	0	0	0	0	0	N/A	N/A	N/A	N/A
4081027960	9200.79	2425.82	231.653	0	0.0101406	0	0	6543.31	0	0	0	0	0	0	0	0	0	0	0	0	0	N/A	0	N/A	N/A	0	N/A
4081029060	126700	64622.1	25291.4	17497	0	231.653	19058.2	0	0	0	0	0	0	0	0	0	0	0	0	0	0	0	N/A	0	0	N/A	N/A
4081029140	296410	163693	74919.5	38397	19399.9	0	0	0	0	229669	127000	64822.1	33744.1	4103.47	0	0	0	0	0.774838	0.77584	0.865224	0.87882	0.211521	N/A	N/A	N/A	N/A
4081029150	151060	82978.9	30621.5	37459.4	0	0	0	0	0	0	0	0	0	0	0	0	0	0	0	0	0	0	N/A	N/A	N/A	N/A	N/A
4081029160	95470.5	49369.3	21207.1	24894.1	0	0	0	0	0	0	0	0	0	0	0	0	0	0	0	0	0	0	N/A	N/A	N/A	N/A	N/A
4081030160	269403	124594	85555.3	59252.9	0	0	0	0	0	41631.9	35980.6	5651.26	0	0	0	0	0	0	0.154534	0.288782	0.0660539	0	N/A	N/A	N/A	N/A	N/A
4081030240	84807.8	44588.5	7730.08	0	316.894	0	0	32172.2	0	0	0	0	0	0	0	0	0	0	0	0	0	N/A	0	N/A	N/A	0	N/A
4081030630	25272.9	11176.2	4930.97	216.348	0	0	8949.37	0	0	0	0	0	0	0	0	0	0	0	0	0	0	0	N/A	N/A	0	N/A	N/A
4081030730	112522	65686.4	14681.5	32153.9	0	0	0	0	0	0	0	0	0	0	0	0	0	0	0	0	0	0	N/A	N/A	N/A	N/A	N/A
4081030890	215929	106662	39856.5	69411	0	0	0	0	0	0	0	0	0	0	0	0	0	0	0	0	0	0	N/A	N/A	N/A	N/A	N/A
4081030900	4585.08	0	0	533.507	4051.57	0	0	0	0	0	0	0	0	0	0	0	0	0	0	N/A	N/A	0	0	N/A	N/A	N/A	N/A
4081030970	48667	27633.6	20716.4	317.042	0	0	0	0	0	0	0	0	0	0	0	0	0	0	0	0	0	0	N/A	N/A	N/A	N/A	N/A
4081030980	201283	99110.4	47792.4	54379.8	0	0	0	0	0	32427.2	25226.1	5829.66	1371.5	0	0	0	0	0	0.161103	0.254525	0.121979	0.0252208	N/A	N/A	N/A	N/A	N/A
4081031350	27194.1	13265.7	5565.73	231.656	0	0	0	8131.06	0	0	0	0	0	0	0	0	0	0	0	0	0	0	N/A	N/A	N/A	0	N/A
4081031450	4445.62	0	0	0	503.755	3941.86	0	0	0	546.642	0	0	0	503.755	42.8871	0	0	0	0.122962	N/A	N/A	N/A	1	0.0108799	N/A	N/A	N/A
4081031460	70597.3	43012.3	6030.12	15012.8	0	0	6542.08	0	0	0	0	0	0	0	0	0	0	0	0	0	0	0	N/A	N/A	0	N/A	N/A
4081031660	87620.9	43069.2	16081.7	28470	0	0	0	0	0	0	0	0	0	0	0	0	0	0	0	0	0	0	N/A	N/A	N/A	N/A	N/A
4081031930	133004	69653.9	22937.7	272.196	40140.4	0	0	0	0	34866.3	25081.9	7719.75	0	2064.68	0	0	0	0	0.262145	0.360094	0.336552	0	0.0514365	N/A	N/A	N/A	N/A
4081032010	48616.9	30440	18176.9	0	0	0	0	0	0	0	0	0	0	0	0	0	0	0	0	0	0	N/A	N/A	N/A	N/A	N/A	N/A
4081032020	96497.6	53045.9	12504	0	0	216.493	0	30731.2	0	0	0	0	0	0	0	0	0	0	0	0	0	N/A	N/A	0	N/A	0	N/A
4081032030	317512	157381	87677.2	40834.6	31619.4	0	0	0	0	61705.5	19452.8	32641.6	863.149	8747.91	0	0	0	0	0.19434	0.123603	0.372293	0.0211377	0.276663	N/A	N/A	N/A	N/A
4081032970	216858	108291	42702.8	39244.9	26618.4	0	0	0	0	125719	58030.2	21134.9	31996.3	14557.8	0	0	0	0	0.579732	0.535871	0.494931	0.8153	0.546905	N/A	N/A	N/A	N/A
4081033030	231337	122808	47737.4	21643.3	39148.3	0	0	0	0	852.671	0	0	0	852.671	0	0	0	0	0.00368583	0	0	0	0.0217805	N/A	N/A	N/A	N/A
4081033080	114434	65948.8	17580	5575.57	25329.6	0	0	0	0	30584.3	21084.4	9440.57	59.3108	0	0	0	0	0	0.267266	0.319709	0.537005	0.0106376	0	N/A	N/A	N/A	N/A
4081033090	62486.1	32137.5	15354.4	14994.3	0	0	0	0	0	15002.5	11318.4	3684.05	0	0	0	0	0	0	0.240093	0.352188	0.239935	0	N/A	N/A	N/A	N/A	N/A
4081033460	717124	411642	149009	74373.5	82099.3	0	0	0	0	0	0	0	0	0	0	0	0	0	0	0	0	0	0	N/A	N/A	N/A	N/A
4081033470	42915.4	24056.9	2817.29	0	0	0	0	16041.1	0	0	0	0	0	0	0	0	0	0	0	0	0	N/A	N/A	N/A	N/A	0	N/A
4081033690	164496	71189	66256	27050.8	0	0	0	0	0	0	0	0	0	0	0	0	0	0	0	0	0	0	N/A	N/A	N/A	N/A	N/A
4081033770	101042	44704.1	19382.6	24842.5	12112.7	0	0	0	0	72688.4	33730.4	17046	21912	0	0	0	0	0	0.719388	0.754526	0.879447	0.882035	0	N/A	N/A	N/A	N/A
4081034660	225170	132808	40087	23497.8	28777.8	0	0	0	0	0	0	0	0	0	0	0	0	0	0	0	0	0	0	N/A	N/A	N/A	N/A
4081034670	39204.5	21558.5	12237.7	5408.36	0	0	0	0	0	0	0	0	0	0	0	0	0	0	0	0	0	0	N/A	N/A	N/A	N/A	N/A
4081034730	65991.7	42266.4	23725.3	0	0	0	0	0	0	0	0	0	0	0	0	0	0	0	0	0	0	N/A	N/A	N/A	N/A	N/A	N/A
4081034750	22283.5	16700	317.28	5266.15	0	0	0	0	0	0	0	0	0	0	0	0	0	0	0	0	0	0	N/A	N/A	N/A	N/A	N/A
4081035250	34882.6	26596.3	8286.33	0	0	0	0	0	0	2197.4	2197.4	0	0	0	0	0	0	0	0.062994	0.0826204	0	N/A	N/A	N/A	N/A	N/A	N/A
4081035260	45463.2	20523.4	21868.6	3071.25	0	0	0	0	0	13484.8	6170.46	7314.33	0	0	0	0	0	0	0.296608	0.300655	0.334467	0	N/A	N/A	N/A	N/A	N/A
4081035930	413659	194675	145231	56100.2	17652.9	0	6.23018e-08	0	0	94892.1	41677.8	49019.5	4194.87	0	0	0	0	0	0.229397	0.214089	0.337528	0.0747747	0	N/A	0	N/A	N/A
4081035940	204897	95068.8	55933	10354.3	0	0	43541	0	0	0	0	0	0	0	0	0	0	0	0	0	0	0	N/A	N/A	0	N/A	N/A
4081036060	111524	57814.8	17430.1	0	36278.8	0	0	0	0	0	0	0	0	0	0	0	0	0	0	0	0	N/A	0	N/A	N/A	N/A	N/A
4081036150	43671.4	28476.7	13097.5	2097.24	0	0	0	0	0	0	0	0	0	0	0	0	0	0	0	0	0	0	N/A	N/A	N/A	N/A	N/A
4081036980	49900.5	34228.5	13810.6	1861.41	0	0	0	0	0	0	0	0	0	0	0	0	0	0	0	0	0	0	N/A	N/A	N/A	N/A	N/A
4081036990	28703.9	19504.9	0	272.55	8926.39	0	0	0	0	0	0	0	0	0	0	0	0	0	0	0	N/A	0	0	N/A	N/A	N/A	N/A
4081037370	105078	56499.6	23851.5	24727.1	0	0	0	0	0	0	0	0	0	0	0	0	0	0	0	0	0	0	N/A	N/A	N/A	N/A	N/A
4081037380	97562.9	42476.2	14445.7	255.279	40385.6	0	0	0	0	1647.61	1647.61	0	0	0	0	0	0	0	0.0168877	0.0387891	0	0	0	N/A	N/A	N/A	N/A
4081038100	33315.1	16339.5	5175.87	476.916	11322.9	0	0	0	0	0	0	0	0	0	0	0	0	0	0	0	0	0	0	N/A	N/A	N/A	N/A
4081038140	57058.3	37030.1	20028.2	0	0	0	0	0	0	0	0	0	0	0	0	0	0	0	0	0	0	N/A	N/A	N/A	N/A	N/A	N/A
4081038650	33300.1	17915.3	15384.8	0	0	0	0	0	0	0	0	0	0	0	0	0	0	0	0	0	0	N/A	N/A	N/A	N/A	N/A	N/A
4081038760	25363.6	17013.2	635.017	291.094	0	0	0	7424.35	0	0	0	0	0	0	0	0	0	0	0	0	0	0	N/A	N/A	N/A	0	N/A
4081038830	90018.3	49878	12104.5	28035.8	0	0	0	0	0	0	0	0	0	0	0	0	0	0	0	0	0	0	N/A	N/A	N/A	N/A	N/A
4081038940	87563.3	39675.3	21171.3	196.128	0	0	0	26520.6	0	0	0	0	0	0	0	0	0	0	0	0	0	0	N/A	N/A	N/A	0	N/A
4081039130	6146.35	0	476.809	0	0	0	0	5669.54	0	0	0	0	0	0	0	0	0	0	0	N/A	0	N/A	N/A	N/A	N/A	0	N/A
4081039180	754092	385222	164636	138160	44470.1	21604.1	0	0	0	0	0	0	0	0	0	0	0	0	0	0	0	0	0	0	N/A	N/A	N/A
4081039190	131942	61155.9	17012.1	5368.96	224.049	0	0	48180.6	0	13953.1	11026.3	2857.81	0	0	0	0	68.9987	0	0.105752	0.180299	0.167987	0	0	N/A	N/A	0.00143209	N/A
4081039200	384282	191315	80238.3	85348.8	27380	0	0	0	0	238657	129346	48221	61089.1	0	0	0	0	0	0.621045	0.676091	0.600973	0.715758	0	N/A	N/A	N/A	N/A
4081039500	141602	57380.9	44387.6	4042.45	221.892	0	35569	0	0	0	0	0	0	0	0	0	0	0	0	0	0	0	0	N/A	0	N/A	N/A
4081039570	587813	329199	132958	57055.4	68600.4	0	0	0	0	7743.03	7577.71	165.32	0	0	0	0	0	0	0.0131726	0.0230186	0.0012434	0	0	N/A	N/A	N/A	N/A
4081040610	20545.7	6333.65	0	0	0	447.243	0	13764.8	0	0	0	0	0	0	0	0	0	0	0	0	N/A	N/A	N/A	0	N/A	0	N/A
4081040780	289103	134567	91733	62803	0	0	0	0	0	2972.12	2972.12	0	0	0	0	0	0	0	0.0102805	0.0220865	0	0	N/A	N/A	N/A	N/A	N/A
4081040790	3835.37	0	0	291.091	0	0	0	3544.28	0	0	0	0	0	0	0	0	0	0	0	N/A	N/A	0	N/A	N/A	N/A	0	N/A
4081040800	1201.34	0	0	0	0	231.66	0	969.683	0	0	0	0	0	0	0	0	0	0	0	N/A	N/A	N/A	N/A	0	N/A	0	N/A
4081040840	248825	107244	62394.7	27616.1	447.831	51121.7	0	0	0	0	0	0	0	0	0	0	0	0	0	0	0	0	0	0	N/A	N/A	N/A
4081040850	59789.8	20274.5	23578.7	15936.6	0	0	0	1.66803e-07	0	0	0	0	0	0	0	0	0	0	0	0	0	0	N/A	N/A	N/A	0	N/A
4081041310	75881.9	37143.6	15623.9	0	217.171	0	0	22897.3	0	0	0	0	0	0	0	0	0	0	0	0	0	N/A	0	N/A	N/A	0	N/A
4081041330	276186	185816	30150	291.106	0	59928.9	0	0	0	0	0	0	0	0	0	0	0	0	0	0	0	0	N/A	0	N/A	N/A	N/A
4081041350	798401	392841	262640	43312.6	533.755	99073.5	0	0	0	81228.3	52356.1	27785.2	0	533.755	553.282	0	0	0	0.101739	0.133276	0.105792	0	1	0.00558456	N/A	N/A	N/A
4081041480	135390	72032	33252.6	25100.7	5004.51	0	0	0	0	0	0	0	0	0	0	0	0	0	0	0	0	0	0	N/A	N/A	N/A	N/A
4081041900	219358	110999	49158.2	8420.45	50780.5	0	0	0	0	7110.6	7110.6	0	0	0	0	0	0	0	0.0324154	0.06406	0	0	0	N/A	N/A	N/A	N/A
4081041950	565828	287441	172725	50659.1	55003.3	0	0	0	0	97949.2	72214.7	25734.5	0	0	0	0	0	0	0.173108	0.251233	0.148991	0	0	N/A	N/A	N/A	N/A
4081042230	165834	86875.7	18308.6	0	231.66	60417.7	0	0	0	10370.7	10370.7	0	0	0	0	0	0	0	0.0625367	0.119374	0	N/A	0	0	N/A	N/A	N/A
4081042320	160802	86295.9	56526	6446.61	11533.7	0	0	0	0	0	0	0	0	0	0	0	0	0	0	0	0	0	0	N/A	N/A	N/A	N/A
4081042400	155018	101240	7958.95	4.59978e-08	45818.8	0	0	0	0	0	0	0	0	0	0	0	0	0	0	0	0	0	0	N/A	N/A	N/A	N/A
4081042410	86361.9	54113.1	17445.1	14803.7	0	0	0	0	0	0	0	0	0	0	0	0	0	0	0	0	0	0	N/A	N/A	N/A	N/A	N/A
4081042900	189529	107976	15589.6	40211	0	249.085	0	25503.1	0	0	0	0	0	0	0	0	0	0	0	0	0	0	N/A	0	N/A	0	N/A
4081043000	23236.4	7896.85	0	0	217.49	15122.1	0	0	0	0	0	0	0	0	0	0	0	0	0	0	N/A	N/A	0	0	N/A	N/A	N/A
4081043580	280355	153345	40077.6	8284.87	0	0	0	78647.2	0	0	0	0	0	0	0	0	0	0	0	0	0	0	N/A	N/A	N/A	0	N/A
4081043590	176091	69864.2	58424.3	0	272.943	0	47529.2	0	0	0	0	0	0	0	0	0	0	0	0	0	0	N/A	0	N/A	0	N/A	N/A
4081043740	46494.7	28700.1	5988.21	317.757	11488.6	0	0	0	0	558.426	0	0	0	558.426	0	0	0	0	0.0120105	0	0	0	0.048607	N/A	N/A	N/A	N/A
4081043920	472799	295088	107091	44487.8	26132.7	0	0	0	0	113867	99193.1	13219.5	1454.86	0	0	0	0	0	0.240837	0.336148	0.123442	0.0327024	0	N/A	N/A	N/A	N/A
4081044950	192356	95961.6	38532.9	0	535.178	57326.8	0	0	0	0	0	0	0	0	0	0	0	0	0	0	0	N/A	0	0	N/A	N/A	N/A
4081045050	200474	105162	45210.7	50100.7	0	0	0	0	0	0	0	0	0	0	0	0	0	0	0	0	0	0	N/A	N/A	N/A	N/A	N/A
4081045130	18710.5	4564.76	1506.44	0	0	0.00934271	447.654	12191.7	0	0	0	0	0	0	0	0	0	0	0	0	0	N/A	N/A	0	0	0	N/A
4081045140	8365.66	0	0	217.735	0	8147.92	0	0	0	0	0	0	0	0	0	0	0	0	0	N/A	N/A	0	N/A	0	N/A	N/A	N/A
4081045660	17852	4268.28	9580.78	317.96	0	3684.97	0	0	0	0	0	0	0	0	0	0	0	0	0	0	0	0	N/A	0	N/A	N/A	N/A
4081045730	192644	87473.3	40093.3	0.00684358	608.948	64468.9	0	0	0	53198.6	28348.8	9507.61	0	0	15342.2	0	0	0	0.276149	0.324085	0.237137	0	0	0.237978	N/A	N/A	N/A
4081045740	155096	67574	27816.3	318.214	59387.5	0	0	0	0	16004.9	15843.5	0	0	161.41	0	0	0	0	0.103194	0.234462	0	0	0.0027179	N/A	N/A	N/A	N/A
4081045790	67556.7	40851.4	10028.1	16677.1	0	0	0	0	0	7461.78	7461.78	0	0	0	0	0	0	0	0.110452	0.182656	0	0	N/A	N/A	N/A	N/A	N/A
4081045940	34456.1	13562.6	7383	0	0	317.923	0	13192.6	0	0	0	0	0	0	0	0	0	0	0	0	0	N/A	N/A	0	N/A	0	N/A
4081045990	148877	84898.7	22375.2	0	477.863	41125	0	0	0	0	0	0	0	0	0	0	0	0	0	0	0	N/A	0	0	N/A	N/A	N/A
4081046070	215089	91923.3	72953	25017	25195.3	0	0	0	0	114170	57777.5	34060.2	3433.99	18898	0	0	0	0	0.530803	0.628541	0.466879	0.137266	0.75006	N/A	N/A	N/A	N/A
4081046170	252152	101012	73668.9	9466.62	291.111	0	0	67712.9	0	0	0	0	0	0	0	0	0	0	0	0	0	0	0	N/A	N/A	0	N/A
4081046180	463338	248800	86946.8	36332	91258.5	0	0	0	0	0	0	0	0	0	0	0	0	0	0	0	0	0	0	N/A	N/A	N/A	N/A
4081046330	261581	122286	67510.2	45921.9	25862.2	0	0	0	0	67844.9	28317.1	22549.4	16978.4	0	0	0	0	0	0.259365	0.231564	0.334014	0.369724	0	N/A	N/A	N/A	N/A
4081046820	78812.4	35857.4	20666.5	22288.5	0	0	0	0	0	0	0	0	0	0	0	0	0	0	0	0	0	0	N/A	N/A	N/A	N/A	N/A
4081046960	212488	99951.1	41989.3	24517	0	265.42	0	45765	0	0	0	0	0	0	0	0	0	0	0	0	0	0	N/A	0	N/A	0	N/A
4081047660	31012.6	12694.7	2316.56	0	231.656	0	0	15769.8	0	0	0	0	0	0	0	0	0	0	0	0	0	N/A	0	N/A	N/A	0	N/A
4081047710	72197.9	42121	15287.9	14789	0	0	0	0	0	0	0	0	0	0	0	0	0	0	0	0	0	0	N/A	N/A	N/A	N/A	N/A
4081047720	422582	231671	81403.1	68492.1	35057.3	5958.72	0	0	0	0	0	0	0	0	0	0	0	0	0	0	0	0	0	0	N/A	N/A	N/A
4081047770	119707	67144.9	13854.3	0	0	217.529	0	38490.6	0	0	0	0	0	0	0	0	0	0	0	0	0	N/A	N/A	0	N/A	0	N/A
4081047880	55855.3	33873.3	3924.89	0	318.182	17738.9	0	0	0	0	0	0	0	0	0	0	0	0	0	0	0	N/A	0	0	N/A	N/A	N/A
4081047890	150685	61634.8	53325.2	14651.6	21073.6	0	0	0	0	0	0	0	0	0	0	0	0	0	0	0	0	0	0	N/A	N/A	N/A	N/A
4081048880	117036	61739.1	25109.2	18443.9	11743.9	0	0	0	0	0	0	0	0	0	0	0	0	0	0	0	0	0	0	N/A	N/A	N/A	N/A
4081048980	9497.55	2799.04	0	0	218.11	6480.4	0	0	0	0	0	0	0	0	0	0	0	0	0	0	N/A	N/A	0	0	N/A	N/A	N/A
4081049440	562080	262512	155195	45851.7	795.738	97725.8	0	0	0	74812.1	35420.6	18570.1	0	630.179	20191.2	0	0	0	0.133099	0.13493	0.119657	0	0.791944	0.206611	N/A	N/A	N/A
4081049600	230021	118071	51328.2	41722.8	18898.3	0.00509058	0	0	0	0	0	0	0	0	0	0	0	0	0	0	0	0	0	0	N/A	N/A	N/A
4081049700	344597	175883	67425.7	72086.3	29201.3	0	0	0	0	0	0	0	0	0	0	0	0	0	0	0	0	0	0	N/A	N/A	N/A	N/A
4081049780	172054	84512.4	28996	17515	218.095	40812.3	0	0	0	0	0	0	0	0	0	0	0	0	0	0	0	0	0	0	N/A	N/A	N/A
4081049950	125433	57113.4	32696.6	8247.9	0.00509115	27374.6	0	0	0	0	0	0	0	0	0	0	0	0	0	0	0	0	0	0	N/A	N/A	N/A
4081049960	335726	190999	111375	9302.8	24049.5	0	0	0	0	71989.1	60003.8	11985.3	0	0	0	0	0	0	0.214428	0.314158	0.107613	0	0	N/A	N/A	N/A	N/A
4081050260	91990.6	51903.9	13089	26997.8	0	0	0	0	0	0	0	0	0	0	0	0	0	0	0	0	0	0	N/A	N/A	N/A	N/A	N/A
4081050380	33858.4	14231.1	9773.06	318.25	9535.97	0	0	0	0	8502.55	5778.02	2724.53	0	0	0	0	0	0	0.251121	0.406013	0.27878	0	0	N/A	N/A	N/A	N/A
4081050750	44599.3	19813.1	21658.9	3127.35	0	0	0	0	0	7303.42	6763.2	540.22	0	0	0	0	0	0	0.163756	0.34135	0.0249422	0	N/A	N/A	N/A	N/A	N/A
4081050890	143810	84499.8	35932.1	218.456	23159.2	0	0	0	0	46909.2	44803.4	2105.74	0	0	0	0	0	0	0.326189	0.530219	0.0586033	0	0	N/A	N/A	N/A	N/A
4081052600	214530	111884	48635.2	28321.1	25690.6	0	0	0	0	0	0	0	0	0	0	0	0	0	0	0	0	0	0	N/A	N/A	N/A	N/A
4081052720	234960	118562	81308	26151.1	8938.75	0	0	0	0	0	0	0	0	0	0	0	0	0	0	0	0	0	0	N/A	N/A	N/A	N/A
4081053310	26655.9	5938.04	6401.15	0	450.109	13866.5	0	0	0	0	0	0	0	0	0	0	0	0	0	0	0	N/A	0	0	N/A	N/A	N/A
4081053350	60140.6	29527.1	10488.8	20124.7	0	0	0	0	0	7452.32	5868.58	1583.74	0	0	0	0	0	0	0.123915	0.198752	0.150994	0	N/A	N/A	N/A	N/A	N/A
4081053580	274582	157985	49702.7	26722.2	40171.7	0	0	0	0	12902.8	9488.27	3414.55	0	0	0	0	0	0	0.0469908	0.060058	0.0686994	0	0	N/A	N/A	N/A	N/A
4081053650	56286.8	33052.8	14730.1	8503.91	0	0	0	0	0	0	0	0	0	0	0	0	0	0	0	0	0	0	N/A	N/A	N/A	N/A	N/A
4081053660	491924	285371	140126	24772	41655.5	0	0	0	0	40663.2	35930.4	4732.85	0	0	0	0	0	0	0.0826616	0.125908	0.0337758	0	0	N/A	N/A	N/A	N/A
4081053770	104256	54254.5	16271.7	537.426	33192.6	0	0	0	0	6406.09	6406.09	0	0	0	0	0	0	0	0.0614457	0.118075	0	0	0	N/A	N/A	N/A	N/A
4081054640	207533	91818.3	69914	15926.7	29874.5	0	0	0	0	0	0	0	0	0	0	0	0	0	0	0	0	0	0	N/A	N/A	N/A	N/A
4081054650	293870	144028	91177.7	33487.2	25176.5	0.00555397	0	0	0	0	0	0	0	0	0	0	0	0	0	0	0	0	0	0	N/A	N/A	N/A
4081054660	258833	132223	58737	13397	536.695	53939.6	0	0	0	0	0	0	0	0	0	0	0	0	0	0	0	0	0	0	N/A	N/A	N/A
4081054710	30102.8	18192	11910.7	0	0	0	0	0	0	0	0	0	0	0	0	0	0	0	0	0	0	N/A	N/A	N/A	N/A	N/A	N/A
4081055020	3444.26	0	230.26	0	3214	0	0	0	0	0	0	0	0	0	0	0	0	0	0	N/A	0	N/A	0	N/A	N/A	N/A	N/A
4081055070	230644	107727	62194.4	32766.8	27956.1	0	0	0	0	0	0	0	0	0	0	0	0	0	0	0	0	0	0	N/A	N/A	N/A	N/A
4081056790	73230.1	45319.3	13525.5	14385.3	0.00465348	0	0	0	0	0	0	0	0	0	0	0	0	0	0	0	0	0	0	N/A	N/A	N/A	N/A
4081056800	148668	80007	32482	33073.6	3105.02	0	0	0	0	0	0	0	0	0	0	0	0	0	0	0	0	0	0	N/A	N/A	N/A	N/A
4081056990	92230.4	45635.1	15249	31346.3	0	0	0	0	0	0	0	0	0	0	0	0	0	0	0	0	0	0	N/A	N/A	N/A	N/A	N/A
4081057000	118485	67400	26133	24952.4	0	0	0	0	0	0	0	0	0	0	0	0	0	0	0	0	0	0	N/A	N/A	N/A	N/A	N/A
4081057080	134426	66534.8	40182.9	27708.7	0	0	0	0	0	0	0	0	0	0	0	0	0	0	0	0	0	0	N/A	N/A	N/A	N/A	N/A
4081057090	105656	55985.3	18111.9	0	482.086	31077	0	0	0	0	0	0	0	0	0	0	0	0	0	0	0	N/A	0	0	N/A	N/A	N/A
4081057700	39694.5	17137.5	12588.4	9968.65	0	0	0	0	0	30418.2	17067.7	10856.3	2494.18	0	0	0	0	0	0.766307	0.99593	0.862405	0.250202	N/A	N/A	N/A	N/A	N/A
4081057840	47330.6	29200.5	4177.91	13952.2	0	0	0	0	0	16122.1	14993.9	1128.19	0	0	0	0	0	0	0.340627	0.513481	0.270038	0	N/A	N/A	N/A	N/A	N/A
4081058080	680507	311065	190703	63494.6	0	217.83	0	115027	0	0	0	0	0	0	0	0	0	0	0	0	0	0	N/A	0	N/A	0	N/A
4081058150	47924.5	21869.1	10317	318.62	0	15419.8	0	0	0	0	0	0	0	0	0	0	0	0	0	0	0	0	N/A	0	N/A	N/A	N/A
4081058860	182629	104201	33733.8	32122.7	12572	0	0	0	0	0	0	0	0	0	0	0	0	0	0	0	0	0	0	N/A	N/A	N/A	N/A
4081058870	65978.5	35044.6	16662.9	537.842	13733.1	0	0	0	0	0	0	0	0	0	0	0	0	0	0	0	0	0	0	N/A	N/A	N/A	N/A
4081060120	248706	125323	66818.3	8248.25	212.535	48103.8	0	0	0	0	0	0	0	0	0	0	0	0	0	0	0	0	0	0	N/A	N/A	N/A
4081060180	132251	79289.5	27780	11832.1	13349.2	0	0	0	0	0	0	0	0	0	0	0	0	0	0	0	0	0	0	N/A	N/A	N/A	N/A
4081060780	167104	84853.9	49873.1	32377.2	0	0	0	0	0	0	0	0	0	0	0	0	0	0	0	0	0	0	N/A	N/A	N/A	N/A	N/A
4081060830	121698	65073.1	28451.4	2201.78	537.939	25433.8	0	0	0	0	0	0	0	0	0	0	0	0	0	0	0	0	0	0	N/A	N/A	N/A
4081061430	110123	61838.3	22862.8	0	0	284.699	0	25137.2	0	0	0	0	0	0	0	0	0	0	0	0	0	N/A	N/A	0	N/A	0	N/A
4081061500	449511	222581	110087	62204.7	17930.5	36707.2	0	0	0	125490	61152.2	31918.1	29755.9	2663.37	0	0	0	0	0.279169	0.274741	0.289935	0.478355	0.148538	0	N/A	N/A	N/A
4081061610	245932	112872	73426.3	13895	45738.7	0	0	0	0	0	0	0	0	0	0	0	0	0	0	0	0	0	0	N/A	N/A	N/A	N/A
4081061700	84892	43392	22302.2	19197.8	0	0	0	0	0	0	0	0	0	0	0	0	0	0	0	0	0	0	N/A	N/A	N/A	N/A	N/A
4081062190	155529	66126.5	45329.9	38826.1	5246.35	0.00565425	0	0	0	0	0	0	0	0	0	0	0	0	0	0	0	0	0	0	N/A	N/A	N/A
4081062200	159034	81782.8	27659.7	23903.4	218.97	25468.6	0	0	0	0	0	0	0	0	0	0	0	0	0	0	0	0	0	0	N/A	N/A	N/A
4081062590	18624.8	6395	3930.82	0	0	275.33	0	8023.64	0	0	0	0	0	0	0	0	0	0	0	0	0	N/A	N/A	0	N/A	0	N/A
4081062600	248140	127477	38123.3	60285.1	22254.4	0	0	0	0	0	0	0	0	0	0	0	0	0	0	0	0	0	0	N/A	N/A	N/A	N/A
4081063090	200831	86363.7	52184.9	41711.7	20570.6	0	0	0	0	40832.4	17169.6	15915.9	6503.46	1243.53	0	0	0	0	0.203317	0.198805	0.30499	0.155915	0.0604519	N/A	N/A	N/A	N/A
4081063100	225688	114246	56505.9	17938	36998.5	0	0	0	0	0	0	0	0	0	0	0	0	0	0	0	0	0	0	N/A	N/A	N/A	N/A
4081064100	143991	79787.8	23036.9	11089.4	0	30076.8	0	0	0	0	0	0	0	0	0	0	0	0	0	0	0	0	N/A	0	N/A	N/A	N/A
4081064180	159594	90377.6	35293	33923.2	0	0	0	0	0	0	0	0	0	0	0	0	0	0	0	0	0	0	N/A	N/A	N/A	N/A	N/A
4081064950	209304	98223.5	60954	24545.6	209.044	25371.9	0	0	0	0	0	0	0	0	0	0	0	0	0	0	0	0	0	0	N/A	N/A	N/A
4081064960	241015	141697	62085.3	37233.2	0	0	0	0	0	0	0	0	0	0	0	0	0	0	0	0	0	0	N/A	N/A	N/A	N/A	N/A
4081065060	204128	101819	57384.6	15076.2	29848.6	0	0	0	0	0	0	0	0	0	0	0	0	0	0	0	0	0	0	N/A	N/A	N/A	N/A
4081065130	70153.2	32610.1	17125.1	2591.62	542.98	17283.4	0	0	0	0	0	0	0	0	0	0	0	0	0	0	0	0	0	0	N/A	N/A	N/A
4081065230	164001	82549.4	48987.1	17049.5	15414.6	0	0	0	0	0	0	0	0	0	0	0	0	0	0	0	0	0	0	N/A	N/A	N/A	N/A
4081065240	96982.1	51711.3	35709.3	9561.5	0	0	0	0	0	0	0	0	0	0	0	0	0	0	0	0	0	0	N/A	N/A	N/A	N/A	N/A
4081065790	55536.5	30624.9	19166.8	5744.68	0	0	0	0	0	0	0	0	0	0	0	0	0	0	0	0	0	0	N/A	N/A	N/A	N/A	N/A
4081065800	65789.3	35770.9	22853	7165.28	0	0	0	0	0	0	0	0	0	0	0	0	0	0	0	0	0	0	N/A	N/A	N/A	N/A	N/A
4081066240	43052.3	25336.9	7198.15	219.401	0	10297.9	0	0	0	0	0	0	0	0	0	0	0	0	0	0	0	0	N/A	0	N/A	N/A	N/A
4081066320	229508	122337	32025.3	63044.5	12100.4	0	0	0	0	26525.1	17800.5	5809.2	1255.89	1659.48	0	0	0	0	0.115574	0.145503	0.181394	0.0199206	0.137143	N/A	N/A	N/A	N/A
4081066410	642708	319093	154074	94023.9	75517.3	0	0	0	0	0	0	0	0	0	0	0	0	0	0	0	0	0	0	N/A	N/A	N/A	N/A
4081066460	97690.4	40828.8	24507.3	3272.4	602.819	28479	0	0	0	0	0	0	0	0	0	0	0	0	0	0	0	0	0	0	N/A	N/A	N/A
4081066830	90804.8	47135.5	17456.9	11768.1	14444.4	0	0	0	0	0	0	0	0	0	0	0	0	0	0	0	0	0	0	N/A	N/A	N/A	N/A
4081066900	51049.2	28946.7	16280.6	5821.86	0	0	0	0	0	0	0	0	0	0	0	0	0	0	0	0	0	0	N/A	N/A	N/A	N/A	N/A
4081067890	170959	81961.8	37926.5	32888.7	18182	0	0	0	0	0	0	0	0	0	0	0	0	0	0	0	0	0	0	N/A	N/A	N/A	N/A
4081067900	120166	63681.8	23102.3	319.049	0	33063.2	0	0	0	0	0	0	0	0	0	0	0	0	0	0	0	0	N/A	0	N/A	N/A	N/A
4081068060	1726.47	0	0	0	449.595	1276.87	0	0	0	0	0	0	0	0	0	0	0	0	0	N/A	N/A	N/A	0	0	N/A	N/A	N/A
4081068230	376721	196683	85327.1	30279.2	64431.4	0	0	0	0	23906.9	19529.5	4377.34	0	0	0	0	0	0	0.0634605	0.0992945	0.0513007	0	0	N/A	N/A	N/A	N/A
4081068270	198442	92455.2	46516.4	18792.2	319.127	40359.3	0	0	0	0	0	0	0	0	0	0	0	0	0	0	0	0	0	0	N/A	N/A	N/A
4081068330	10966.8	5397.39	0	0	479.402	5090.04	0	0	0	0	0	0	0	0	0	0	0	0	0	0	N/A	N/A	0	0	N/A	N/A	N/A
4081068920	33866.1	9317.72	6730.44	275.878	17542.1	0	0	0	0	0	0	0	0	0	0	0	0	0	0	0	0	0	0	N/A	N/A	N/A	N/A
4081068960	75524.6	41411.6	22239.6	11873.4	0	0	0	0	0	0	0	0	0	0	0	0	0	0	0	0	0	0	N/A	N/A	N/A	N/A	N/A
4081069140	91904.7	38892.8	17103.2	5621.86	227.943	30058.9	0	0	0	65420	25169.4	15806.5	5586.01	0	18858.1	0	0	0	0.711824	0.647148	0.92418	0.993623	0	0.627372	N/A	N/A	N/A
4081069190	285325	133022	73955.9	49794.7	28551.7	0	0	0	0	926.126	0	0	0	926.126	0	0	0	0	0.00324587	0	0	0	0.0324368	N/A	N/A	N/A	N/A
4081069340	12560.5	3568.52	0	224.91	8767.1	0	0	0	0	0	0	0	0	0	0	0	0	0	0	0	N/A	0	0	N/A	N/A	N/A	N/A
4081069420	223262	105851	65473.6	46543.6	5393.61	0	0	0	0	27176.9	12614.9	6720.47	7360.95	480.572	0	0	0	0	0.121727	0.119176	0.102644	0.158152	0.0891001	N/A	N/A	N/A	N/A
4081069880	443344	224644	113099	28677.1	9312.45	67611.4	0	0	0	4237.2	3369.37	867.83	0	0	0	0	0	0	0.00955736	0.0149987	0.00767319	0	0	0	N/A	N/A	N/A
4081069940	316912	155910	88664.2	28504.8	0	219.858	0	43613.3	0	80244.8	57867.4	14675.8	7701.6	0	0	0	0	0	0.253208	0.371158	0.165521	0.270186	N/A	0	N/A	0	N/A
4081070290	31016.1	7939.86	15591.3	0	0	231.653	0	7253.28	0	0	0	0	0	0	0	0	0	0	0	0	0	N/A	N/A	0	N/A	0	N/A
4081070300	87643.4	36437.2	11252.7	29460.9	219.74	10272.8	0	0	0	35611.5	12357.4	638.658	12123	219.74	10272.8	0	0	0	0.406323	0.339141	0.0567557	0.411493	1	1	N/A	N/A	N/A
4081070360	847729	459802	166479	127045	94403.6	0	0	0	0	46184.9	31480.8	10523.4	4180.7	0	0	0	0	0	0.0544807	0.0684661	0.0632115	0.0329072	0	N/A	N/A	N/A	N/A
4081070370	173535	84977.5	25460.4	16914.1	0	539.494	45643	0	0	136388	65531.3	19269.5	13793.2	0	0	37794.2	0	0	0.785942	0.77116	0.756844	0.815484	N/A	0	0.828038	N/A	N/A
4081070400	616100	321092	141867	62086	13984.6	0	0	77070.1	0	0	0	0	0	0	0	0	0	0	0	0	0	0	0	N/A	N/A	0	N/A
4081070410	530948	304411	100956	43093.1	64594.4	17893.5	0	0	0	244517	141796	59999.5	28774.9	13946.4	0	0	0	0	0.460528	0.465804	0.594311	0.667738	0.215907	0	N/A	N/A	N/A
4081070470	715294	417064	133672	80202.1	52127.2	32228.5	0	0	0	418377	252169	88094.5	45732.2	19686.1	12695.4	0	0	0	0.584903	0.60463	0.659035	0.570211	0.377655	0.39392	N/A	N/A	N/A
4081070550	286504	146530	51740.4	30417	15037.3	0	291.092	42488.6	0	12417.5	12417.5	0	0	0	0	0	0	0	0.0433413	0.0847435	0	0	0	N/A	0	0	N/A
4081070820	147154	74862.8	32682.9	39607.9	0	0	0	0	0	49509.7	38017	4836.56	6656.17	0	0	0	0	0	0.336449	0.507823	0.147984	0.168052	N/A	N/A	N/A	N/A	N/A
4081070830	149984	73099.5	45394.5	0	0	474.948	31015.2	0	0	5528.65	5528.65	0	0	0	0	0	0	0	0.0368616	0.0756318	0	N/A	N/A	0	0	N/A	N/A
4081071310	121574	55701.2	23341.3	26095	0	0	0	16436.5	0	0	0	0	0	0	0	0	0	0	0	0	0	0	N/A	N/A	N/A	0	N/A
4081071320	532665	256513	111927	42629	61092.2	319.362	60184.9	0.00511062	0	227018	122653	39071.9	21102.9	12871	319.362	31000	0	0	0.426192	0.478155	0.349083	0.495036	0.210681	1	0.515078	0	N/A
4081071670	172614	95966	36068.8	10886	276.239	0	0	29417.1	0	0	0	0	0	0	0	0	0	0	0	0	0	0	0	N/A	N/A	0	N/A
4081071680	160337	76671.5	41276.2	42388.9	0	0	0	0	0	35741.7	20234.2	15507.5	0	0	0	0	0	0	0.222917	0.263908	0.3757	0	N/A	N/A	N/A	N/A	N/A
4081072100	65397.9	22780.9	18251.1	449.858	0	0	23916	0	0	0	0	0	0	0	0	0	0	0	0	0	0	0	N/A	N/A	0	N/A	N/A
4081072160	116393	56108.9	25001.1	35283.3	0	0	0	0	0	68490.6	38708	19735.2	10047.4	0	0	0	0	0	0.588441	0.689872	0.789375	0.284762	N/A	N/A	N/A	N/A	N/A
4081072170	252167	123384	56386.3	0	443.804	71952.5	0	0	0	2535.37	2535.37	0	0	0	0	0	0	0	0.0100543	0.0205486	0	N/A	0	0	N/A	N/A	N/A
4081072230	149645	69434.8	32691.2	0	233.276	47285.6	0	0	0	19925.3	1136.39	0	0	233.276	18555.6	0	0	0	0.133151	0.0163663	0	N/A	1	0.392416	N/A	N/A	N/A
4081072660	474308	265661	103387	48037.3	17897.3	39325.4	0	0	0	0	0	0	0	0	0	0	0	0	0	0	0	0	0	0	N/A	N/A	N/A
4081072700	120445	68111.2	21662.3	283.176	0	0	0	30387.8	0	5128	5128	0	0	0	0	0	0	0	0.0425756	0.0752886	0	0	N/A	N/A	N/A	0	N/A
4081072710	135923	59567.4	32096.5	41359.5	2899.6	0	0	0	0	53540.2	30370.6	7479.58	15689.9	0	0	0	0	0	0.393901	0.509854	0.233034	0.379355	0	N/A	N/A	N/A	N/A
4081072800	101095	40917	45536.4	319.477	0	0	14322.1	0	0	24468.4	11889.3	12579.1	0	0	0	0	0	0	0.242034	0.290572	0.276242	0	N/A	N/A	0	N/A	N/A
4081073750	25196.4	8259.65	1741.42	0	231.656	0	14963.6	0	0	0	0	0	0	0	0	0	0	0	0	0	0	N/A	0	N/A	0	N/A	N/A
4081073760	437119	228600	98311	18910.1	0	0	91297.7	0	0	50784.7	47695.6	3089.11	0	0	0	0	0	0	0.11618	0.208642	0.0314218	0	N/A	N/A	0	N/A	N/A
4081073820	86041.7	41329.1	32260.2	12452.4	0	0	0	0	0	34122.7	27184.6	6938.09	0	0	0	0	0	0	0.396583	0.657759	0.215067	0	N/A	N/A	N/A	N/A	N/A
4081073830	45581.6	27666.1	1520.15	0	319.682	0	0	16075.7	0	0	0	0	0	0	0	0	0	0	0	0	0	N/A	0	N/A	N/A	0	N/A
4081074480	276674	141460	63056.4	25898.9	30351.9	15907.5	0	0	0	0	0	0	0	0	0	0	0	0	0	0	0	0	0	0	N/A	N/A	N/A
4081074530	43687.2	28487.7	5976.25	297.884	0	0	0	8925.33	0	0	0	0	0	0	0	0	0	0	0	0	0	0	N/A	N/A	N/A	0	N/A
4081074540	128845	67634.1	31719.8	29491.1	0	0	0	0	0	32200.8	26548.6	5652.23	0	0	0	0	0	0	0.249919	0.392532	0.178192	0	N/A	N/A	N/A	N/A	N/A
4081074620	193971	97758.1	43896.3	22929.2	29387	0	0	0	0	0	0	0	0	0	0	0	0	0	0	0	0	0	0	N/A	N/A	N/A	N/A
4081075060	381068	172754	125998	71329.2	10987.1	0	0	0	0	80868.2	52122.9	25353.2	1065.51	2326.54	0	0	0	0	0.212214	0.301719	0.201218	0.0149379	0.211752	N/A	N/A	N/A	N/A
4081075260	638583	338364	130329	88971.6	7731.92	73187.2	0	0	0	533940	283296	105255	88676.1	7212.34	49500.6	0	0	0	0.836132	0.837252	0.807613	0.996678	0.932801	0.676356	N/A	N/A	N/A
4081075530	129231	58540.5	33826.8	0	231.656	0	0	36631.7	0	0	0	0	0	0	0	0	0	0	0	0	0	N/A	0	N/A	N/A	0	N/A
4081075570	117189	55082.1	25633.3	36473.5	0	0	0	0	0	0	0	0	0	0	0	0	0	0	0	0	0	0	N/A	N/A	N/A	N/A	N/A
4081075640	18288.5	7407.81	0	0	319.708	0	0	10561	0	0	0	0	0	0	0	0	0	0	0	0	N/A	N/A	0	N/A	N/A	0	N/A
4081075650	116237	61130.9	25246.7	3347.57	26511.6	0	0	0	0	0	0	0	0	0	0	0	0	0	0	0	0	0	0	N/A	N/A	N/A	N/A
4081075960	354472	179700	71816.8	40320.5	0.00511542	277.079	0	62356.9	0	0	0	0	0	0	0	0	0	0	0	0	0	0	0	0	N/A	0	N/A
4081076030	354839	174281	105434	30121.8	45002	0	0	0	0	0	0	0	0	0	0	0	0	0	0	0	0	0	0	N/A	N/A	N/A	N/A
4081076150	89233.6	48580.1	16840.7	23812.9	0	0	0	0	0	0	0	0	0	0	0	0	0	0	0	0	0	0	N/A	N/A	N/A	N/A	N/A
4081076170	171598	84100.1	37672.4	16958.5	32867.2	0	0	0	0	0	0	0	0	0	0	0	0	0	0	0	0	0	0	N/A	N/A	N/A	N/A
4081076840	319909	167194	88456.2	44576.5	19682.3	0	0	0	0	0	0	0	0	0	0	0	0	0	0	0	0	0	0	N/A	N/A	N/A	N/A
4081076950	1886.06	0	265.414	0	0	0	0	1620.65	0	0	0	0	0	0	0	0	0	0	0	N/A	0	N/A	N/A	N/A	N/A	0	N/A
4081076980	46998.4	32692.8	1566.2	0	277.095	0	0	12462.3	0	0	0	0	0	0	0	0	0	0	0	0	0	N/A	0	N/A	N/A	0	N/A
4081077010	42747.4	18351.7	24395.7	0	0	0	0	0	0	0	0	0	0	0	0	0	0	0	0	0	0	N/A	N/A	N/A	N/A	N/A	N/A
4081077430	806098	449170	161561	120183	0	231.66	0	74952.8	0	50603.6	44074.6	6529.01	0	0	0	0	0	0	0.0627759	0.0981245	0.040412	0	N/A	0	N/A	0	N/A
4081077480	770486	376254	261436	65476.8	36585.2	30734.1	0	0	0	8370.93	8370.93	0	0	0	0	0	0	0	0.0108645	0.0222481	0	0	0	0	N/A	N/A	N/A
4081077580	13350.3	4698.66	0	0	0	239.264	0	8412.38	0	0	0	0	0	0	0	0	0	0	0	0	N/A	N/A	N/A	0	N/A	0	N/A
4081077590	202280	109502	36693.1	0	56084.6	0	0	0	0	0	0	0	0	0	0	0	0	0	0	0	0	N/A	0	N/A	N/A	N/A	N/A
4081077860	62692.2	35778.1	13035	13879.1	0	0	0	0	0	0	0	0	0	0	0	0	0	0	0	0	0	0	N/A	N/A	N/A	N/A	N/A
4081077890	178205	85355.3	40976.1	20388.4	31485.5	0	0	0	0	0	0	0	0	0	0	0	0	0	0	0	0	0	0	N/A	N/A	N/A	N/A
4081077930	561354	273529	152865	32960.3	8655.6	276.273	0	93068.2	0	39162.8	27378.2	8747.02	3037.6	0	0	0	0	0	0.069765	0.100093	0.0572207	0.0921593	0	0	N/A	0	N/A
4081077940	140216	78183.4	22416.5	7667.03	0	31949.2	0	0	0	0	0	0	0	0	0	0	0	0	0	0	0	0	N/A	0	N/A	N/A	N/A
4081077980	303607	157392	80763.9	24450.3	41000.9	0	0	0	0	0	0	0	0	0	0	0	0	0	0	0	0	0	0	N/A	N/A	N/A	N/A
4081078110	680031	332740	160008	80754.2	319.621	106209	0	0	0	0	0	0	0	0	0	0	0	0	0	0	0	0	0	0	N/A	N/A	N/A
4081078600	103150	59638	25243.5	18268.7	0	0	0	0	0	0	0	0	0	0	0	0	0	0	0	0	0	0	N/A	N/A	N/A	N/A	N/A
4081078690	33614.1	19637.3	3882.98	319.958	9773.81	0	0	0	0	0	0	0	0	0	0	0	0	0	0	0	0	0	0	N/A	N/A	N/A	N/A
4081079240	80350.6	46530.1	3243.81	9.20609e-08	220.841	30355.8	0	0	0	0	0	0	0	0	0	0	0	0	0	0	0	0	0	0	N/A	N/A	N/A
4081079250	61940.1	20825.9	17603.8	0	500.054	23010.4	0	0	0	0	0	0	0	0	0	0	0	0	0	0	0	N/A	0	0	N/A	N/A	N/A
4081079310	75230.6	36315.2	32505.8	6409.58	0	0	0	0	0	487.489	487.489	0	0	0	0	0	0	0	0.00647993	0.0134238	0	0	N/A	N/A	N/A	N/A	N/A
4081079370	607735	333761	113568	87848	72557.2	0	0	0	0	0	0	0	0	0	0	0	0	0	0	0	0	0	0	N/A	N/A	N/A	N/A
4081079380	487856	257888	85132.8	112758	32078	0	0	0	0	485019	256729	85132.8	112758	30399.1	0	0	0	0	0.994184	0.995509	1	1	0.947663	N/A	N/A	N/A	N/A
4081079460	298760	158132	62533.1	25668.1	52427.2	0	0	0	0	266736	144778	62533.1	25668.1	33756.6	0	0	0	0	0.892808	0.915551	1	1	0.643876	N/A	N/A	N/A	N/A
4081079600	27470.2	9665.7	8695.64	559.286	8549.54	0	0	0	0	0	0	0	0	0	0	0	0	0	0	0	0	0	0	N/A	N/A	N/A	N/A
4081079610	92402.2	56394.6	18649.9	17357.7	0	0	0	0	0	0	0	0	0	0	0	0	0	0	0	0	0	0	N/A	N/A	N/A	N/A	N/A
4081080120	770162	412995	180715	47141.9	26579.6	7185.72	231.656	95312.7	0	18561.3	16975.3	1585.96	0	0	0	0	0	0	0.0241004	0.0411029	0.008776	0	0	0	0	0	N/A
4081080170	373016	155445	108431	48188.1	0	540.775	60411.4	0.0048586	0	0	0	0	0	0	0	0	0	0	0	0	0	0	N/A	0	0	0	N/A
4081080340	93475	44222.4	14784.2	4789.22	286.208	29393	0	0	0	0	0	0	0	0	0	0	0	0	0	0	0	0	0	0	N/A	N/A	N/A
4081080370	108311	44558	20244.8	4791.27	509.413	38207.6	0	0	0	0	0	0	0	0	0	0	0	0	0	0	0	0	0	0	N/A	N/A	N/A
4081080620	265873	160414	63552	41906.3	0	0	0	0	0	952.113	952.113	0	0	0	0	0	0	0	0.00358109	0.00593534	0	0	N/A	N/A	N/A	N/A	N/A
4081080630	103006	60178.2	22057.5	20769.9	0	0	0	0	0	0	0	0	0	0	0	0	0	0	0	0	0	0	N/A	N/A	N/A	N/A	N/A
4081081090	744424	376016	148106	117267	93004.6	10030.1	0	0	0	289131	146901	68919.3	62656	10655.3	0	0	0	0	0.388396	0.390677	0.465338	0.534301	0.114567	0	N/A	N/A	N/A
4081081110	202140	112013	43754.3	3465.62	42906.7	0	0	0	0	0	0	0	0	0	0	0	0	0	0	0	0	0	0	N/A	N/A	N/A	N/A
4081081120	170169	90402.9	45513.4	34253	0	0	0	0	0	0	0	0	0	0	0	0	0	0	0	0	0	0	N/A	N/A	N/A	N/A	N/A
4081081130	258902	129208	59687.5	52193	0	0	232.626	17581	0	0	0	0	0	0	0	0	0	0	0	0	0	0	N/A	N/A	0	0	N/A
4081081190	273792	132518	73605.9	47012.7	20655.9	6.07777e-08	0	0	0	0	0	0	0	0	0	0	0	0	0	0	0	0	0	0	N/A	N/A	N/A
4081081220	7853.35	1104.28	0	0	448.363	6300.7	0	0	0	0	0	0	0	0	0	0	0	0	0	0	N/A	N/A	0	0	N/A	N/A	N/A
4081081930	19114.8	6135.79	3929.19	320.127	8729.67	0	0	0	0	0	0	0	0	0	0	0	0	0	0	0	0	0	0	N/A	N/A	N/A	N/A
4081081980	202977	104913	43595.5	37785.5	16682.6	0	0	0	0	46143.5	31393.7	8943.28	4775.34	1031.11	0	0	0	0	0.227334	0.299235	0.205142	0.12638	0.0618076	N/A	N/A	N/A	N/A
4081082460	214319	99761.3	73790.5	22649.9	18117.2	0	0	0	0	34570.7	20581.6	10301.9	3687.22	0	0	0	0	0	0.161305	0.206308	0.13961	0.162792	0	N/A	N/A	N/A	N/A
4081082470	133270	60951.9	45712.6	26605.6	0	0	0	0	0	11652.7	11652.7	0	0	0	0	0	0	0	0.0874371	0.19118	0	0	N/A	N/A	N/A	N/A	N/A
4081082580	73420.5	36348.7	37071.8	0	0	0	0	0	0	0	0	0	0	0	0	0	0	0	0	0	0	N/A	N/A	N/A	N/A	N/A	N/A
4081082590	15076.8	7243.23	0	578.428	7255.16	0	0	0	0	0	0	0	0	0	0	0	0	0	0	0	N/A	0	0	N/A	N/A	N/A	N/A
4081082710	1959.21	0	480.781	0	1478.43	0	0	0	0	0	0	0	0	0	0	0	0	0	0	N/A	0	N/A	0	N/A	N/A	N/A	N/A
4081082720	43633.3	18095.7	25537.6	0	0	0	0	0	0	0	0	0	0	0	0	0	0	0	0	0	0	N/A	N/A	N/A	N/A	N/A	N/A
4081082890	54909.6	28275.7	26634	0	0	0	0	0	0	0	0	0	0	0	0	0	0	0	0	0	0	N/A	N/A	N/A	N/A	N/A	N/A
4081082900	14808.1	10349.6	221.008	0	4237.55	0	0	0	0	0	0	0	0	0	0	0	0	0	0	0	0	N/A	0	N/A	N/A	N/A	N/A
4081082910	59375.9	20709.2	24287	14379.7	0	0	0	0	0	0	0	0	0	0	0	0	0	0	0	0	0	0	N/A	N/A	N/A	N/A	N/A
4081082920	301161	201872	60195.9	39093.5	0	0	0	0	0	0	0	0	0	0	0	0	0	0	0	0	0	0	N/A	N/A	N/A	N/A	N/A
4081082960	234446	117156	70885.3	22848	23556.5	0	0	0	0	115932	70498.9	34467.5	10002.6	962.897	0	0	0	0	0.494493	0.601752	0.486243	0.437788	0.0408761	N/A	N/A	N/A	N/A
4081083010	716857	348938	176817	86332.3	104771	0	0	0	0	358600	174182	102363	69645.4	12409.9	0	0	0	0	0.50024	0.499179	0.57892	0.806713	0.118449	N/A	N/A	N/A	N/A
4081083250	84843.7	49003.4	35840.3	0	0	0	0	0	0	4725.95	4725.95	0	0	0	0	0	0	0	0.0557018	0.0964413	0	N/A	N/A	N/A	N/A	N/A	N/A
4081083310	17204.6	3643.94	0	244.074	13316.6	0	0	0	0	0	0	0	0	0	0	0	0	0	0	0	N/A	0	0	N/A	N/A	N/A	N/A
4081083420	99666.7	55022.1	25266.5	19213.8	164.304	0	0	0	0	0	0	0	0	0	0	0	0	0	0	0	0	0	0	N/A	N/A	N/A	N/A
4081083540	97122.9	42272.6	20715.5	2430.54	31704.2	0	0	0	0	0	0	0	0	0	0	0	0	0	0	0	0	0	0	N/A	N/A	N/A	N/A
4081084010	541143	282807	128583	36954.4	18436.8	74363.1	0	0	0	80846.8	54348	21879.2	4619.55	0	0	0	0	0	0.1494	0.192174	0.170157	0.125007	0	0	N/A	N/A	N/A
4081084020	279750	141564	63310.2	43814.1	31061.5	0	0	0	0	0	0	0	0	0	0	0	0	0	0	0	0	0	0	N/A	N/A	N/A	N/A
4081084200	216470	124162	40834.6	51473.5	0	0	0	0	0	809.567	0	809.567	0	0	0	0	0	0	0.00373986	0	0.0198255	0	N/A	N/A	N/A	N/A	N/A
4081084380	155282	82482	31277.2	464.873	41057.9	0	0	0	0	1558.16	1558.16	0	0	0	0	0	0	0	0.0100344	0.0188909	0	0	0	N/A	N/A	N/A	N/A
4081084580	227739	112046	82074.8	20162.3	13455.7	0	0	0	0	0	0	0	0	0	0	0	0	0	0	0	0	0	0	N/A	N/A	N/A	N/A
4081084750	293950	149244	96178.1	48527.7	0	0	0	0	0	82507.8	56447.5	26060.2	0	0	0	0	0	0	0.280686	0.378223	0.270958	0	N/A	N/A	N/A	N/A	N/A
4081084810	56852	32085.6	16149.2	231.661	8385.53	0	0	0	0	0	0	0	0	0	0	0	0	0	0	0	0	0	0	N/A	N/A	N/A	N/A
4081084830	72383	38063.1	26791	7528.84	0	0	0	0	0	1977.28	1977.28	0	0	0	0	0	0	0	0.0273169	0.0519474	0	0	N/A	N/A	N/A	N/A	N/A
4081084980	116660	65020.1	22988.6	28651.1	0	0	0	0	0	0	0	0	0	0	0	0	0	0	0	0	0	0	N/A	N/A	N/A	N/A	N/A
4081085080	34095.3	17825.3	16270	0	0	0	0	0	0	0	0	0	0	0	0	0	0	0	0	0	0	N/A	N/A	N/A	N/A	N/A	N/A
4081085690	133957	66088	42968.5	0	320.225	24580	0	0	0	0	0	0	0	0	0	0	0	0	0	0	0	N/A	0	0	N/A	N/A	N/A
4081085700	149964	81681.4	21326.2	46956.4	0	0	0	0	0	0	0	0	0	0	0	0	0	0	0	0	0	0	N/A	N/A	N/A	N/A	N/A
4081086300	128228	77278.5	22878.9	28071.1	0	0	0	0	0	70291.9	47011.1	13700.7	9580.14	0	0	0	0	0	0.548177	0.608334	0.598835	0.341282	N/A	N/A	N/A	N/A	N/A
4081086340	110016	51967.6	41431.3	16617.3	0	0	0	0	0	34805.3	24242.2	10563.2	0	0	0	0	0	0	0.316365	0.466486	0.254956	0	N/A	N/A	N/A	N/A	N/A
4081086360	121917	61903.8	43066.1	12333.1	4614.14	0	0	0	0	0	0	0	0	0	0	0	0	0	0	0	0	0	0	N/A	N/A	N/A	N/A
4081086430	316832	160030	74820.1	77523.4	4458.25	0	0	0	0	51768.5	32201.1	19225.1	342.359	0	0	0	0	0	0.163394	0.201219	0.256951	0.0044162	0	N/A	N/A	N/A	N/A
4081087700	77905.4	43014	5259.9	1304.54	0	28327	0	0	0	0	0	0	0	0	0	0	0	0	0	0	0	0	N/A	0	N/A	N/A	N/A
4081087750	748744	415674	168435	80487.6	84147.5	0	0	0	0	11936.8	9079.98	1248.01	1608.85	0	0	0	0	0	0.0159425	0.021844	0.00740942	0.0199888	0	N/A	N/A	N/A	N/A
4081088360	104535	54605.2	14999.5	1567.43	535.184	32827.5	0	0	0	0	0	0	0	0	0	0	0	0	0	0	0	0	0	0	N/A	N/A	N/A
4081088430	73511.2	50984.5	12496.3	10030.4	0	0	0	0	0	13214	13214	0	0	0	0	0	0	0	0.179755	0.259177	0	0	N/A	N/A	N/A	N/A	N/A
4081089090	259962	139694	64260.4	20057.1	35950.6	0	0	0	0	0	0	0	0	0	0	0	0	0	0	0	0	0	0	N/A	N/A	N/A	N/A
4081089120	122656	75880.5	20420.9	291.106	0	26063.1	0	0	0	12882.4	12669.2	213.206	0	0	0	0	0	0	0.105029	0.166963	0.0104406	0	N/A	0	N/A	N/A	N/A
4081089420	777048	374508	191144	84808.3	41533.2	231.653	0	84823.1	0	70177.2	41371.1	24928.7	3877.35	0	0	0	0	0	0.0903126	0.110468	0.130419	0.045719	0	0	N/A	0	N/A
4081089430	311358	137758	42555.5	50663.6	320.453	80060.4	0	0	0	0	0	0	0	0	0	0	0	0	0	0	0	0	0	0	N/A	N/A	N/A
4081089590	121722	60362.2	36361	0	291.095	24708	0	0	0	0	0	0	0	0	0	0	0	0	0	0	0	N/A	0	0	N/A	N/A	N/A
4081089600	3092.84	0	0	0	0	320.577	0	2772.27	0	0	0	0	0	0	0	0	0	0	0	N/A	N/A	N/A	N/A	0	N/A	0	N/A
4081090080	10183.9	3792.33	0	0	0	320.6	0	6070.93	0	0	0	0	0	0	0	0	0	0	0	0	N/A	N/A	N/A	0	N/A	0	N/A
4081090130	217877	100756	69195.5	25247.2	22678.8	0	0	0	0	0	0	0	0	0	0	0	0	0	0	0	0	0	0	N/A	N/A	N/A	N/A
4081090730	288989	143773	51056.7	94159.9	0	0	0	0	0	15764	14684.9	1079.11	0	0	0	0	0	0	0.0545487	0.10214	0.0211355	0	N/A	N/A	N/A	N/A	N/A
4081090800	710367	345266	173039	162951	29110.4	0	0	0	0	59455.7	37768.5	6673.84	15013.4	0	0	0	0	0	0.0836971	0.109389	0.0385685	0.0921341	0	N/A	N/A	N/A	N/A
4081090900	199330	122757	34072.6	42499.6	0	0	0	0	0	5060.6	5060.6	0	0	0	0	0	0	0	0.0253881	0.0412244	0	0	N/A	N/A	N/A	N/A	N/A
4081090970	847770	423109	271988	78258.3	74415.1	0	0	0	0	0	0	0	0	0	0	0	0	0	0	0	0	0	0	N/A	N/A	N/A	N/A
4081091080	19356.9	14132.3	0	231.653	4992.89	0	0	0	0	0	0	0	0	0	0	0	0	0	0	0	N/A	0	0	N/A	N/A	N/A	N/A
4081091160	108124	55636.9	27852.3	24635.1	0	0	0	0	0	14185.4	13448.1	0	737.279	0	0	0	0	0	0.131196	0.241713	0	0.0299279	N/A	N/A	N/A	N/A	N/A
4081091170	82239.7	52034	14543.7	15662	0	0	0	0	0	8095.19	392.567	1396.3	6306.33	0	0	0	0	0	0.0984341	0.00754444	0.0960071	0.402652	N/A	N/A	N/A	N/A	N/A
4081091200	41369.9	22080.5	2672.69	301.418	16315.3	0	0	0	0	17838.9	8499.88	0	0	9339.04	0	0	0	0	0.431206	0.384951	0	0	0.572409	N/A	N/A	N/A	N/A
4081091210	124131	52800.8	45937.3	13194.5	12198.6	0	0	0	0	0	0	0	0	0	0	0	0	0	0	0	0	0	0	N/A	N/A	N/A	N/A
4081091220	240442	119355	82248.2	10629.3	28210	0	0	0	0	85572.2	46801	35762.7	3008.52	0	0	0	0	0	0.355895	0.392117	0.434814	0.283039	0	N/A	N/A	N/A	N/A
4081091330	11563.9	7252.11	0	231.66	4080.09	0	0	0	0	9520.23	5980.66	0	0	3539.57	0	0	0	0	0.823274	0.824679	N/A	0	0.867522	N/A	N/A	N/A	N/A
4081091340	78004.7	47675.5	21410.1	8919.17	0	0.00465297	0	0	0	0	0	0	0	0	0	0	0	0	0	0	0	0	N/A	0	N/A	N/A	N/A
4081091350	8596.72	1425.44	0	0	784.037	6387.24	0	0	0	0	0	0	0	0	0	0	0	0	0	0	N/A	N/A	0	0	N/A	N/A	N/A
4081091420	385648	196594	89165.5	27587.8	72300.6	0	0	0	0	23467.6	6787.48	4798.78	0	11881.3	0	0	0	0	0.0608524	0.0345255	0.0538187	0	0.164332	N/A	N/A	N/A	N/A
4081091730	16464.5	7036.5	0	451.65	8976.35	0	0	0	0	0	0	0	0	0	0	0	0	0	0	0	N/A	0	0	N/A	N/A	N/A	N/A
4081091810	300082	157567	107488	29114.7	5912.74	0	0	0	0	13134.4	11579.9	1554.5	0	0	0	0	0	0	0.0437692	0.0734916	0.0144622	0	0	N/A	N/A	N/A	N/A
4081091940	100823	44619.2	36190.2	0	802.366	19211.6	0	0	0	0	0	0	0	0	0	0	0	0	0	0	0	N/A	0	0	N/A	N/A	N/A
4081091950	125095	72128.5	35170	17796.1	0	0	0	0	0	0	0	0	0	0	0	0	0	0	0	0	0	0	N/A	N/A	N/A	N/A	N/A
4081092620	934348	503840	230922	125733	72142.2	1710.72	0	0	0	331528	196291	101091	34145.7	0	0	0	0	0	0.354822	0.38959	0.437772	0.271573	0	0	N/A	N/A	N/A
4081092670	683184	326747	180602	33152.7	142683	0	0	0	0	75700.4	35139.2	32252.6	0	8308.59	0	0	0	0	0.110805	0.107543	0.178584	0	0.0582312	N/A	N/A	N/A	N/A
4081093390	402721	211908	99632.6	91181.2	0	0	0	6.69468e-08	0	143943	83136.9	44291.2	16515.3	0	0	0	0	0	0.357427	0.392326	0.444546	0.181126	N/A	N/A	N/A	0	N/A
4081093400	197278	100121	31167.1	37180.8	221.69	0	0	28587.3	0	0	0	0	0	0	0	0	0	0	0	0	0	0	0	N/A	N/A	0	N/A
4081093670	60993.4	40868.2	3700.19	0	476.097	15948.9	0	0	0	0	0	0	0	0	0	0	0	0	0	0	0	N/A	0	0	N/A	N/A	N/A
4081093700	174462	93980.3	61202.9	19279	0	0	0	0	0	0	0	0	0	0	0	0	0	0	0	0	0	0	N/A	N/A	N/A	N/A	N/A
4081094590	14163.7	3947.27	0	219.239	0	0	0	9997.19	0	0	0	0	0	0	0	0	0	0	0	0	N/A	0	N/A	N/A	N/A	0	N/A
4081094680	203703	120207	37071.3	15437.2	30987	0	0	0	0	0	0	0	0	0	0	0	0	0	0	0	0	0	0	N/A	N/A	N/A	N/A
4081095050	138519	64719.3	38569.8	21986.6	13243.3	0.00563628	0	0	0	0	0	0	0	0	0	0	0	0	0	0	0	0	0	0	N/A	N/A	N/A
4081095060	218244	102366	50862.1	24197.4	0	40818.4	0	0	0	0	0	0	0	0	0	0	0	0	0	0	0	0	N/A	0	N/A	N/A	N/A
4081095110	129368	71504.5	28925.8	15742	13195.2	0	0	0	0	0	0	0	0	0	0	0	0	0	0	0	0	0	0	N/A	N/A	N/A	N/A
4081095190	5667.4	0	0	0	279.069	0	0	5388.34	0	0	0	0	0	0	0	0	0	0	0	N/A	N/A	N/A	0	N/A	N/A	0	N/A
4081095870	417949	229290	107614	81046.1	0.0051357	0	0	0	0	95256.6	70248.1	19625.9	5382.6	0	0	0	0	0	0.227914	0.306373	0.182373	0.066414	0	N/A	N/A	N/A	N/A
4081095950	473438	236403	75239	113997	47799.9	0	0	0	0	148598	72475.8	41323.1	34798.8	0	0	0	0	0	0.313869	0.306578	0.549224	0.305261	0	N/A	N/A	N/A	N/A
4081096260	283826	144967	62391.7	22389.3	0	54078	0	0	0	0	0	0	0	0	0	0	0	0	0	0	0	0	N/A	0	N/A	N/A	N/A
4081096270	144327	77214.7	26284.2	40828	0	0.0051358	0	0	0	0	0	0	0	0	0	0	0	0	0	0	0	0	N/A	0	N/A	N/A	N/A
4081096290	130950	71590.4	36639.1	17254	5466.4	0	0	0	0	101080	54679.4	33844.9	8347.27	4208.55	0	0	0	0	0.771899	0.763781	0.923737	0.483788	0.769894	N/A	N/A	N/A	N/A
4081096350	116113	68064	21588.4	199.59	0	26261.2	0	0	0	56757.7	35099.9	12405.8	0	0	9251.98	0	0	0	0.488814	0.51569	0.574654	0	N/A	0.352305	N/A	N/A	N/A
4081096650	136634	106111	26991.4	3531.29	0	0	0	0	0	3352.84	3352.84	0	0	0	0	0	0	0	0.0245389	0.0315974	0	0	N/A	N/A	N/A	N/A	N/A
4081096710	85500	50489.9	22663.2	12346.8	0	0.0114399	0	0	0	0	0	0	0	0	0	0	0	0	0	0	0	0	N/A	0	N/A	N/A	N/A
4081096730	118778	48940.3	41512.6	265.418	0	28059.9	0	0	0	0	0	0	0	0	0	0	0	0	0	0	0	0	N/A	0	N/A	N/A	N/A
4081096740	74012.4	43450.8	9428.18	321.042	0	20812.3	0	0	0	0	0	0	0	0	0	0	0	0	0	0	0	0	N/A	0	N/A	N/A	N/A
4081096750	12979.1	4567.88	0	231.656	0	8179.56	0	0	0	0	0	0	0	0	0	0	0	0	0	0	N/A	0	N/A	0	N/A	N/A	N/A
4081096770	137796	77247.5	21887	5508.9	543.642	32608.8	0	0	0	15214.8	12668.1	2546.67	0	0	0	0	0	0	0.110416	0.163994	0.116356	0	0	0	N/A	N/A	N/A
4081096820	106913	64893.3	19884.8	0	481.968	0	0	21653.4	0	250.337	250.337	0	0	0	0	0	0	0	0.00234149	0.00385767	0	N/A	0	N/A	N/A	0	N/A
4081096880	179679	100934	24439.7	0	221.906	54083.8	0	0	0	116805	71057.9	13666.2	0	0	32080.8	0	0	0	0.650074	0.704004	0.559179	N/A	0	0.593169	N/A	N/A	N/A
4081096890	127346	80724.2	13092	0	238.618	33291	0	0	0	127346	80724.2	13092	0	238.618	33291	0	0	0	1	1	1	N/A	1	1	N/A	N/A	N/A
4081096920	439112	218409	130635	50372.5	39694.5	0	0	0	0	8640.61	4375.2	1421.86	2843.55	0	0	0	0	0	0.0196775	0.0200321	0.0108842	0.0564504	0	N/A	N/A	N/A	N/A
4081096930	2108.67	0	0	0	231.653	1877.02	0	0	0	2108.67	0	0	0	231.653	1877.02	0	0	0	1	N/A	N/A	N/A	1	1	N/A	N/A	N/A
4081096970	254237	132967	40660.1	36788.8	43821.1	0	0	0	0	79802.3	45630.6	13288.8	3394.1	17488.8	0	0	0	0	0.313889	0.343172	0.326828	0.092259	0.399095	N/A	N/A	N/A	N/A
4081097380	283846	148341	59161.3	28823.4	0	47520.6	0	0	0	0	0	0	0	0	0	0	0	0	0	0	0	0	N/A	0	N/A	N/A	N/A
4081097390	143483	79635.6	39090.7	24757	0	0	0	0	0	0	0	0	0	0	0	0	0	0	0	0	0	0	N/A	N/A	N/A	N/A	N/A
4081097510	29988	8302.92	10974.5	0	0	552.704	10157.9	0	0	0	0	0	0	0	0	0	0	0	0	0	0	N/A	N/A	0	0	N/A	N/A
4081097520	229701	122674	61524.9	14375.3	211.048	30915.7	0	0	0	0	0	0	0	0	0	0	0	0	0	0	0	0	0	0	N/A	N/A	N/A
4081097530	684773	365027	186393	39201.5	17954.1	76197.4	0	0	0	153845	75710.8	64865.5	13268.5	0	0	0	0	0	0.224665	0.207411	0.348004	0.33847	0	0	N/A	N/A	N/A
4081097540	493672	271721	120259	57106.1	44586.7	0	0	0	0	172262	107780	35147.7	6275.03	23059.7	0	0	0	0	0.348941	0.396657	0.292267	0.109884	0.517187	N/A	N/A	N/A	N/A
4081097590	55218.5	30800	22067.8	2350.64	0	0	0	0	0	0	0	0	0	0	0	0	0	0	0	0	0	0	N/A	N/A	N/A	N/A	N/A
4081097660	754630	378802	163549	50011.5	81751.3	1933.26	78582.2	0	0	246111	111201	40687.1	16596.8	18058	1933.26	57634.8	0	0	0.326134	0.293559	0.248776	0.33186	0.22089	1	0.733433	N/A	N/A
4081098010	11877	3155.64	0	0	0	446.378	8274.93	0	0	0	0	0	0	0	0	0	0	0	0	0	N/A	N/A	N/A	0	0	N/A	N/A
4081098080	559378	288800	121224	34190.6	37867.3	0	77296.8	0	0	263267	106044	58611.4	20794.4	25173.1	0	52644.1	0	0	0.470641	0.367187	0.483498	0.60819	0.664771	N/A	0.681065	N/A	N/A
4081098350	38599.1	24515.1	0	286.408	0	0	13797.6	0	0	0	0	0	0	0	0	0	0	0	0	0	N/A	0	N/A	N/A	0	N/A	N/A
4081098410	73951	41667.2	15315	231.66	0	16737.1	0	0	0	0	0	0	0	0	0	0	0	0	0	0	0	0	N/A	0	N/A	N/A	N/A
4081098460	99614.7	60291.6	21489.6	17833.5	0	0	0	0	0	0	0	0	0	0	0	0	0	0	0	0	0	0	N/A	N/A	N/A	N/A	N/A
4081098480	374711	202959	104454	452.335	0	0.0106259	66845.7	0	0	0	0	0	0	0	0	0	0	0	0	0	0	0	N/A	0	0	N/A	N/A
4081098740	66559.8	22413.1	20211.2	23935.5	0	0	0	0	0	0	0	0	0	0	0	0	0	0	0	0	0	0	N/A	N/A	N/A	N/A	N/A
4081098770	29077.9	21580.4	0	321.155	0	0	7176.34	0	0	0	0	0	0	0	0	0	0	0	0	0	N/A	0	N/A	N/A	0	N/A	N/A
4081098790	46944	22608.6	11800.3	231.66	0	0	12303.4	0	0	0	0	0	0	0	0	0	0	0	0	0	0	0	N/A	N/A	0	N/A	N/A
4081098850	53369.1	21174.6	15065.8	17128.7	0	0	0	0	0	0	0	0	0	0	0	0	0	0	0	0	0	0	N/A	N/A	N/A	N/A	N/A
4081098870	190907	108315	37940	39981.7	4670.19	0	0	0	0	60121.8	41798.7	11904.9	6418.23	0	0	0	0	0	0.314927	0.385898	0.313781	0.160529	0	N/A	N/A	N/A	N/A
4081098890	91293.2	42557.3	34266.6	222.55	0	14246.7	0	0	0	0	0	0	0	0	0	0	0	0	0	0	0	0	N/A	0	N/A	N/A	N/A
4081098900	135072	78082.1	34056.8	22932.7	0	0	0	0	0	0	0	0	0	0	0	0	0	0	0	0	0	0	N/A	N/A	N/A	N/A	N/A
4081098910	259997	115143	83260.7	32510.9	29081.8	0	0	0	0	21278.7	7188.96	14089.8	0	0	0	0	0	0	0.0818423	0.0624349	0.169225	0	0	N/A	N/A	N/A	N/A
4081099630	98469.2	50177.6	45893.9	2397.65	0	0	0	0	0	3684.1	3684.1	0	0	0	0	0	0	0	0.0374137	0.0734211	0	0	N/A	N/A	N/A	N/A	N/A
4081099680	84966.9	46442.7	9133.09	0	321.341	29069.8	0	0	0	0	0	0	0	0	0	0	0	0	0	0	0	N/A	0	0	N/A	N/A	N/A
4081100320	197883	82055	46110	0	0	0	531.573	69186.3	0	0	0	0	0	0	0	0	0	0	0	0	0	N/A	N/A	N/A	0	0	N/A
4081100330	313848	164197	70565.7	36070.1	43015.1	0	0	0	0	134680	73078.5	30450.8	0	31150.4	0	0	0	0	0.429123	0.445065	0.431524	0	0.724174	N/A	N/A	N/A	N/A
4081100360	657079	345083	186811	52431.2	13821.7	0	0	58932.5	0	34796.6	23043.8	11175.1	577.733	0	0	0	0	0	0.0529565	0.0667777	0.0598202	0.0110189	0	N/A	N/A	0	N/A
4081100370	4337.64	0	0	0	0	0	0	454.285	3883.36	0	0	0	0	0	0	0	0	0	0	N/A	N/A	N/A	N/A	N/A	N/A	0	0
4081100430	112830	60696.7	30237.3	4618.12	17277.9	0	0	0	0	0	0	0	0	0	0	0	0	0	0	0	0	0	0	N/A	N/A	N/A	N/A
4081100460	293253	143809	67042.2	46113.2	36288.4	0	0	0	0	130373	58292.6	24435.5	22198.3	25446.5	0	0	0	0	0.444575	0.405348	0.364479	0.481388	0.701229	N/A	N/A	N/A	N/A
4081100530	3486.02	0	0	0	773.616	2712.41	0	0	0	3486.02	0	0	0	773.616	2712.41	0	0	0	1	N/A	N/A	N/A	1	1	N/A	N/A	N/A
4081100640	297530	148250	85205.9	29304.6	34769.5	0	0	0	0	0	0	0	0	0	0	0	0	0	0	0	0	0	0	N/A	N/A	N/A	N/A
4081100770	166107	72196.2	41882.4	52028.5	0	0	0	0	0	39240.2	17990.9	21249.3	0	0	0	0	0	0	0.236234	0.249194	0.507356	0	N/A	N/A	N/A	N/A	N/A
4081100780	316025	157900	76208.7	63526.3	18390.3	0	0	0	0	197682	115972	65049.2	16661.1	0	0	0	0	0	0.625527	0.734465	0.853567	0.262271	0	N/A	N/A	N/A	N/A
4081100940	165550	68607.3	45167.9	12126.3	0	321.146	39327.8	0	0	0	0	0	0	0	0	0	0	0	0	0	0	0	N/A	0	0	N/A	N/A
4081101050	94996.6	51708.6	20721.1	22566.9	0	0	0	0	0	0	0	0	0	0	0	0	0	0	0	0	0	0	N/A	N/A	N/A	N/A	N/A
4081101150	41799.2	15682.6	7080.92	0	215.322	0	0	0	18820.3	0	0	0	0	0	0	0	0	0	0	0	0	N/A	0	N/A	N/A	N/A	0
4081101190	174212	83350	62768.3	5579.66	22513.7	0	0	0	0	0	0	0	0	0	0	0	0	0	0	0	0	0	0	N/A	N/A	N/A	N/A
4081101220	475077	233553	116419	98232.9	26871.9	0	0	0	0	340959	172857	75528.2	88452.9	4120.31	0	0	0	0	0.717692	0.74012	0.648762	0.90044	0.153331	N/A	N/A	N/A	N/A
4081101320	292121	164512	75542	6119.14	1.42688e-07	45948.2	0	0	0	0	0	0	0	0	0	0	0	0	0	0	0	0	0	0	N/A	N/A	N/A
4081101700	13175.4	2665.04	0	289.729	0	0	10220.6	0	0	0	0	0	0	0	0	0	0	0	0	0	N/A	0	N/A	N/A	0	N/A	N/A
4081101720	95156.5	46595.5	38512.5	10048.4	0	0	0	0	0	0	0	0	0	0	0	0	0	0	0	0	0	0	N/A	N/A	N/A	N/A	N/A
4081102060	1.10161e+06	598446	315585	93394.6	94182.8	0	0	0	0	13703.1	10263.5	3439.62	0	0	0	0	0	0	0.0124391	0.0171502	0.0108992	0	0	N/A	N/A	N/A	N/A
4081102110	36008.1	13961.2	0	242.553	0	0	21804.3	0	0	0	0	0	0	0	0	0	0	0	0	0	N/A	0	N/A	N/A	0	N/A	N/A
4081102620	164034	73852.7	53615.8	16628.7	222.689	0	0	0	19714.6	0	0	0	0	0	0	0	0	0	0	0	0	0	0	N/A	N/A	N/A	0
4081102680	116868	60329.8	20173.2	36365.3	0	0	0	0	0	0	0	0	0	0	0	0	0	0	0	0	0	0	N/A	N/A	N/A	N/A	N/A
4081103250	24557.8	10215.6	0	0	231.653	0	14110.5	0	0	0	0	0	0	0	0	0	0	0	0	0	N/A	N/A	0	N/A	0	N/A	N/A
4081103300	323474	165679	66786.5	74758.8	16249.2	0	0	0	0	5698.94	5585.37	113.565	0	0	0	0	0	0	0.0176179	0.0337119	0.00170043	0	0	N/A	N/A	N/A	N/A
4081103320	89770.7	39720.2	33640.5	16410.1	0	0	0	0	0	0	0	0	0	0	0	0	0	0	0	0	0	0	N/A	N/A	N/A	N/A	N/A
4081103360	527034	277403	147405	57391.1	44834.5	0	0	0	0	0	0	0	0	0	0	0	0	0	0	0	0	0	0	N/A	N/A	N/A	N/A
4081103470	194840	112144	37333.2	11569.3	33793.8	0	0	0	0	15498	15423.7	0	0	74.2622	0	0	0	0	0.0795418	0.137534	0	0	0.00219751	N/A	N/A	N/A	N/A
4081103510	200571	100621	22200.9	59799.1	17949.8	0	0	0	0	14843.7	12960.5	1883.24	0	0	0	0	0	0	0.0740072	0.128804	0.0848273	0	0	N/A	N/A	N/A	N/A
4081103740	231625	130534	46641.6	54449	0	0	0	0	0	10705.1	5601.89	0	5103.21	0	0	0	0	0	0.0462174	0.0429151	0	0.0937246	N/A	N/A	N/A	N/A	N/A
4081103810	226233	129288	35049.4	16924.6	297.888	44673.6	0	0	0	0	0	0	0	0	0	0	0	0	0	0	0	0	0	0	N/A	N/A	N/A
4081103920	176538	80157.1	40962.4	30361.5	478.192	24579.1	0	0	0	455.942	455.942	0	0	0	0	0	0	0	0.00258268	0.00568811	0	0	0	0	N/A	N/A	N/A
4081104060	340428	152384	87944.4	41092	59007.5	0	0	0	0	0	0	0	0	0	0	0	0	0	0	0	0	0	0	N/A	N/A	N/A	N/A
4081104140	25981.4	14108.8	6354.62	0	321.53	5196.43	0	0	0	1095.52	1095.52	0	0	0	0	0	0	0	0.0421657	0.0776482	0	N/A	0	0	N/A	N/A	N/A
4081104310	177043	80064.2	50674.5	35491.3	10813.3	0	0	0	0	0	0	0	0	0	0	0	0	0	0	0	0	0	0	N/A	N/A	N/A	N/A
4081105000	132704	58620.3	51341.8	0	540.287	22201.5	0	0	0	9953.08	9953.08	0	0	0	0	0	0	0	0.0750022	0.169789	0	N/A	0	0	N/A	N/A	N/A
4081105040	397831	195835	110353	37197.2	54446.3	0	0	0	0	3379.52	3379.52	0	0	0	0	0	0	0	0.00849485	0.017257	0	0	0	N/A	N/A	N/A	N/A
4081105420	159850	87849.7	30170.4	38562	3267.86	0	0	0	0	0	0	0	0	0	0	0	0	0	0	0	0	0	0	N/A	N/A	N/A	N/A
4081105500	19196.3	6245.42	0	551.927	12398.9	0	0	0	0	0	0	0	0	0	0	0	0	0	0	0	N/A	0	0	N/A	N/A	N/A	N/A
4081105670	303848	153976	86432.2	63439.6	0	0	0	0	0	0	0	0	0	0	0	0	0	0	0	0	0	0	N/A	N/A	N/A	N/A	N/A
4081105720	184114	98490.6	32066.1	53557.6	0	0	0	0	0	0	0	0	0	0	0	0	0	0	0	0	0	0	N/A	N/A	N/A	N/A	N/A
4081105750	566748	269300	145575	60814.2	482.526	90576.9	0	0	0	88883.1	29491.1	29783.3	6304.85	223.58	23080.2	0	0	0	0.15683	0.10951	0.204591	0.103674	0.463354	0.254814	N/A	N/A	N/A
4081105800	365422	168272	97872.9	71068	28209	0	0	0	0	0	0	0	0	0	0	0	0	0	0	0	0	0	0	N/A	N/A	N/A	N/A
4081106100	36151.4	14714.2	14849.2	6588.02	0	0	0	0	0	0	0	0	0	0	0	0	0	0	0	0	0	0	N/A	N/A	N/A	N/A	N/A
4081106130	53853.3	25288.3	6588.71	0	460.749	21515.5	0	0	0	0	0	0	0	0	0	0	0	0	0	0	0	N/A	0	0	N/A	N/A	N/A
4081106550	405212	249929	85664	4896.65	0	0	0	0	64721.9	235052	148037	46086.1	2446.22	0	0	0	0	38482.5	0.580072	0.592317	0.537987	0.499569	N/A	N/A	N/A	N/A	0.594582
4081106600	145393	84803	45829.5	9567.56	5193.35	0	0	0	0	42994.4	33943.2	7096.5	0	1954.62	0	0	0	0	0.295711	0.40026	0.154846	0	0.37637	N/A	N/A	N/A	N/A
4081107190	233129	114329	69450	49350.1	0	0	0	0	0	0	0	0	0	0	0	0	0	0	0	0	0	0	N/A	N/A	N/A	N/A	N/A
4081107310	6255.55	669.983	280.646	0	0	0	5304.92	0	0	0	0	0	0	0	0	0	0	0	0	0	0	N/A	N/A	N/A	0	N/A	N/A
4081107370	752908	386303	196476	69280.4	75106.2	25742.1	0	0	0	0	0	0	0	0	0	0	0	0	0	0	0	0	0	0	N/A	N/A	N/A
4081107430	36098.6	7321.98	17750.7	0	0	321.76	10704.1	0	0	0	0	0	0	0	0	0	0	0	0	0	0	N/A	N/A	0	0	N/A	N/A
4081107440	247063	137263	29465.8	32046.9	48288.3	0	0	0	0	0	0	0	0	0	0	0	0	0	0	0	0	0	0	N/A	N/A	N/A	N/A
4081107460	93672.9	37475	26800.6	231.66	0	29165.6	0	0	0	0	0	0	0	0	0	0	0	0	0	0	0	0	N/A	0	N/A	N/A	N/A
4081107500	68110.7	53820.7	0	464.918	0	0	13825	0	0	0	0	0	0	0	0	0	0	0	0	0	N/A	0	N/A	N/A	0	N/A	N/A
4081107510	41445.8	26108.1	15337.7	0	0	0	0	0	0	0	0	0	0	0	0	0	0	0	0	0	0	N/A	N/A	N/A	N/A	N/A	N/A
4081107750	68606.4	39038.7	0	453.325	0	0	29114.4	0	0	0	0	0	0	0	0	0	0	0	0	0	N/A	0	N/A	N/A	0	N/A	N/A
4081107760	59246	29370.9	29875.1	0	0	0	0	0	0	0	0	0	0	0	0	0	0	0	0	0	0	N/A	N/A	N/A	N/A	N/A	N/A
4081107770	70870	34741.4	5603.51	483.191	0	0	30041.9	0	0	0	0	0	0	0	0	0	0	0	0	0	0	0	N/A	N/A	0	N/A	N/A
4081107780	3195.85	0	223.313	0	0	2972.54	0	0	0	0	0	0	0	0	0	0	0	0	0	N/A	0	N/A	N/A	0	N/A	N/A	N/A
4081107960	35226	6091.81	0	291.109	0	28843.1	0	0	0	0	0	0	0	0	0	0	0	0	0	0	N/A	0	N/A	0	N/A	N/A	N/A
4081107980	751405	438924	167923	61787.5	482.89	82287.1	0	0	0	7774.37	7774.37	0	0	0	0	0	0	0	0.0103464	0.0177123	0	0	0	0	N/A	N/A	N/A
4081108010	412663	217249	94377.8	101037	0	0	0	0	0	0	0	0	0	0	0	0	0	0	0	0	0	0	N/A	N/A	N/A	N/A	N/A
4081108020	11782.5	3365.24	0	252.266	0	8164.97	0	0	0	0	0	0	0	0	0	0	0	0	0	0	N/A	0	N/A	0	N/A	N/A	N/A
4081108040	176939	78414.2	54597.7	43927.5	0	0	0	0	0	0	0	0	0	0	0	0	0	0	0	0	0	0	N/A	N/A	N/A	N/A	N/A
4081108070	238990	141175	38215.3	231.656	0	59368.1	0	0	0	0	0	0	0	0	0	0	0	0	0	0	0	0	N/A	0	N/A	N/A	N/A
4081108080	60132.6	34484.9	643.605	0	0	514.475	24489.7	0	0	0	0	0	0	0	0	0	0	0	0	0	0	N/A	N/A	0	0	N/A	N/A
4081108090	89739.2	38532.5	34759	16447.8	0	0	0	0	0	0	0	0	0	0	0	0	0	0	0	0	0	0	N/A	N/A	N/A	N/A	N/A
4081108100	69843.9	31998.6	17918.2	13439.6	0	231.66	6255.79	0	0	0	0	0	0	0	0	0	0	0	0	0	0	0	N/A	0	0	N/A	N/A
4081108150	194216	94029.7	39146	9688.35	51352.1	0	0	0	0	0	0	0	0	0	0	0	0	0	0	0	0	0	0	N/A	N/A	N/A	N/A
4081108500	250283	118523	74556.3	21489.7	255.748	0	0	7.25387e-08	35458.6	155437	75062	36534.8	11810.6	255.748	0	0	0	31773.9	0.621046	0.633314	0.49003	0.549595	1	N/A	N/A	0	0.896084
4081108550	85119.9	50727.6	10196.2	0	231.66	0	23964.5	0	0	0	0	0	0	0	0	0	0	0	0	0	0	N/A	0	N/A	0	N/A	N/A
4081108580	50039.9	24979.3	11812.7	0	291.574	0	0	12956.4	0	22126.6	13976.8	6612.91	0	0	0	0	1536.85	0	0.442178	0.559536	0.559813	N/A	0	N/A	N/A	0.118618	N/A
4081108620	313486	142680	71547.8	67601.8	31656.5	0	0	0	0	0	0	0	0	0	0	0	0	0	0	0	0	0	0	N/A	N/A	N/A	N/A
4081108640	1.1421e+06	554684	282034	213206	33156.2	59021.9	0	0	0	0	0	0	0	0	0	0	0	0	0	0	0	0	0	0	N/A	N/A	N/A
4081108670	29520.5	22397.1	0	0	0	321.853	0	6801.59	0	0	0	0	0	0	0	0	0	0	0	0	N/A	N/A	N/A	0	N/A	0	N/A
4081108680	300437	152904	72924.3	32575.1	42033.3	0	0	0	0	0	0	0	0	0	0	0	0	0	0	0	0	0	0	N/A	N/A	N/A	N/A
4081108740	111130	44814.6	29297.3	0	321.848	0	36696.4	0	0	0	0	0	0	0	0	0	0	0	0	0	0	N/A	0	N/A	0	N/A	N/A
4081108750	40071	21058.9	5071.99	0	291.114	0	13649	0	0	0	0	0	0	0	0	0	0	0	0	0	0	N/A	0	N/A	0	N/A	N/A
4081108760	140016	70775.2	22617.3	0	223.507	0	0	46400.3	0	0	0	0	0	0	0	0	0	0	0	0	0	N/A	0	N/A	N/A	0	N/A
4081108770	69740.4	36144.8	3305.48	231.653	0	30058.4	0	0	0	0	0	0	0	0	0	0	0	0	0	0	0	0	N/A	0	N/A	N/A	N/A
4081108780	61858.7	25990.5	19774.7	0	286.149	0	0	15807.4	0	0	0	0	0	0	0	0	0	0	0	0	0	N/A	0	N/A	N/A	0	N/A
4081108810	138710	80909.3	20420.4	37380.8	0	0	0	0	0	0	0	0	0	0	0	0	0	0	0	0	0	0	N/A	N/A	N/A	N/A	N/A
4081108860	251075	139621	58562.8	288.968	52602.7	0	0	0	0	0	0	0	0	0	0	0	0	0	0	0	0	0	0	N/A	N/A	N/A	N/A
4081108980	394965	166118	124930	46597.3	223.139	57096.5	0	0	0	0	0	0	0	0	0	0	0	0	0	0	0	0	0	0	N/A	N/A	N/A
4081109040	158305	85964.7	27334.4	45005.9	0	0	0	0	0	0	0	0	0	0	0	0	0	0	0	0	0	0	N/A	N/A	N/A	N/A	N/A
4081109120	449490	243208	96600.9	50777.1	58904	0	0	0	0	2789.56	2789.56	0	0	0	0	0	0	0	0.00620605	0.0114698	0	0	0	N/A	N/A	N/A	N/A
4081109130	250607	121124	79336.8	38318.2	11827.4	0	0	0	0	84929.1	37163.2	26008.8	14518.9	7238.2	0	0	0	0	0.338894	0.306819	0.327828	0.378903	0.611987	N/A	N/A	N/A	N/A
4081109220	6251.89	694.969	0	0	231.66	0	0	5325.26	0	0	0	0	0	0	0	0	0	0	0	0	N/A	N/A	0	N/A	N/A	0	N/A
4081109310	773904	388923	221606	96022.1	67353.1	0	0	0	0	212816	138776	60462.4	13577.7	0	0	0	0	0	0.27499	0.356822	0.272837	0.141402	0	N/A	N/A	N/A	N/A
4081109540	54277.3	33276.5	11997.5	244.789	0	8758.52	0	0	0	0	0	0	0	0	0	0	0	0	0	0	0	0	N/A	0	N/A	N/A	N/A
4081109630	123699	52274.4	49920.4	21504.2	0	0	0	0	0	0	0	0	0	0	0	0	0	0	0	0	0	0	N/A	N/A	N/A	N/A	N/A
4081109640	154919	83517.3	41134.3	16294.5	13972.6	0	0	0	0	0	0	0	0	0	0	0	0	0	0	0	0	0	0	N/A	N/A	N/A	N/A
4081109670	1.1736e+06	602848	275110	169206	126432	0	0	0.00515055	0	0	0	0	0	0	0	0	0	0	0	0	0	0	0	N/A	N/A	0	N/A
4081109680	66450.1	33226.1	12623.9	0	0	291.105	0	20309	0	0	0	0	0	0	0	0	0	0	0	0	0	N/A	N/A	0	N/A	0	N/A
4081109690	570193	294295	132301	98091.2	45505.4	0	0	0	0	0	0	0	0	0	0	0	0	0	0	0	0	0	0	N/A	N/A	N/A	N/A
4081109790	14765.6	0	0	0	231.656	14534	0	0	0	0	0	0	0	0	0	0	0	0	0	N/A	N/A	N/A	0	0	N/A	N/A	N/A
4081109810	11272.9	1609.61	0	0	0	0	524.173	9139.13	0	0	0	0	0	0	0	0	0	0	0	0	N/A	N/A	N/A	N/A	0	0	N/A
4081110180	706863	366019	181611	103779	55453.6	0	0	0	0	0	0	0	0	0	0	0	0	0	0	0	0	0	0	N/A	N/A	N/A	N/A
4081110190	89640.3	60256.7	0	0	223.756	29159.7	0	0	0	0	0	0	0	0	0	0	0	0	0	0	N/A	N/A	0	0	N/A	N/A	N/A
4081110320	621658	287587	144121	53518.8	0	0	136431	0	0	0	0	0	0	0	0	0	0	0	0	0	0	0	N/A	N/A	0	N/A	N/A
4081110330	163461	84482.7	47770.7	31207.7	0	0	0	0	0	0	0	0	0	0	0	0	0	0	0	0	0	0	N/A	N/A	N/A	N/A	N/A
4081110370	18376.7	6671.66	0	280.986	0	0	11424.1	0	0	0	0	0	0	0	0	0	0	0	0	0	N/A	0	N/A	N/A	0	N/A	N/A
4081110440	305011	165049	81596.4	4348.18	0	54017.8	0	0	0	0	0	0	0	0	0	0	0	0	0	0	0	0	N/A	0	N/A	N/A	N/A
4081110540	192029	100341	34479.1	14248	464.921	0	42496.3	0	0	0	0	0	0	0	0	0	0	0	0	0	0	0	0	N/A	0	N/A	N/A
4081110630	7773.88	694.969	0	252.257	6826.65	0	0	0	0	0	0	0	0	0	0	0	0	0	0	0	N/A	0	0	N/A	N/A	N/A	N/A
4081110770	13388	8504.5	0	0	0	203.736	4679.76	0	0	0	0	0	0	0	0	0	0	0	0	0	N/A	N/A	N/A	0	0	N/A	N/A
4081110780	158061	86359.8	24769.5	46932.2	0	0	0	0	0	0	0	0	0	0	0	0	0	0	0	0	0	0	N/A	N/A	N/A	N/A	N/A
4081110860	319715	167755	76740.3	23538.9	10550.7	0	0	321.847	40808.3	5274.55	3576.48	0	0	0	0	0	130.953	1567.12	0.0164977	0.0213197	0	0	0	N/A	N/A	0.406879	0.038402
4081110870	465917	241708	122093	67664	0	34451.4	0	0	0	0	0	0	0	0	0	0	0	0	0	0	0	0	N/A	0	N/A	N/A	N/A
4081110990	137773	73267.2	21402.7	8949.72	291.113	0	33862.1	0	0	0	0	0	0	0	0	0	0	0	0	0	0	0	0	N/A	0	N/A	N/A
4081111040	74183.4	42389.7	4484.26	4233.14	545.115	22531.2	0.00499952	0	0	0	0	0	0	0	0	0	0	0	0	0	0	0	0	0	0	N/A	N/A
4081111160	174853	97566.5	29700.9	5203.69	42382.3	0	0	0	0	0	0	0	0	0	0	0	0	0	0	0	0	0	0	N/A	N/A	N/A	N/A
4081111220	117766	62913.3	31080.9	23771.9	0	0	0	0	0	0	0	0	0	0	0	0	0	0	0	0	0	0	N/A	N/A	N/A	N/A	N/A
4081111420	294276	159119	49900.8	42383.8	553.539	42318.9	0	0	0	108594	58896.3	29289.6	15589.9	0	4818.46	0	0	0	0.369021	0.37014	0.586955	0.367826	0	0.113861	N/A	N/A	N/A
4081111580	117527	56942.5	31476.4	22923.8	6184.05	0	0	0	0	117527	56942.5	31476.4	22923.8	6184.05	0	0	0	0	1	1	1	1	1	N/A	N/A	N/A	N/A
4081111760	103373	65088.4	22214	5175.23	231.653	10663.3	0	0	0	3385.65	1550.2	0	0	231.653	1603.79	0	0	0	0.0327519	0.0238169	0	0	1	0.150403	N/A	N/A	N/A
4081111770	140264	72958	48338.7	17653.5	1313.6	0	0	0	0	0	0	0	0	0	0	0	0	0	0	0	0	0	0	N/A	N/A	N/A	N/A
4081112130	59386.3	29197.2	30189.2	0	0	0	0	0	0	0	0	0	0	0	0	0	0	0	0	0	0	N/A	N/A	N/A	N/A	N/A	N/A
4081112180	19675.4	12194	0	223.795	7257.61	0	0	0	0	0	0	0	0	0	0	0	0	0	0	0	N/A	0	0	N/A	N/A	N/A	N/A
4081112220	133130	76950.1	12670.7	0	43509.7	0	0	0	0	0	0	0	0	0	0	0	0	0	0	0	0	N/A	0	N/A	N/A	N/A	N/A
4081112280	144590	91366.3	17077.6	0	476.309	35669.5	0	0	0	0	0	0	0	0	0	0	0	0	0	0	0	N/A	0	0	N/A	N/A	N/A
4081112290	133704	74569.8	28294.9	0	30839.6	0	0	0	0	0	0	0	0	0	0	0	0	0	0	0	0	N/A	0	N/A	N/A	N/A	N/A
4081112370	454844	226470	131978	35318.6	61076.9	0	0	0	0	55722	48279.2	7442.85	0	0	0	0	0	0	0.122508	0.213181	0.0563946	0	0	N/A	N/A	N/A	N/A
4081112420	145598	84548.4	18811.7	42238.1	0	0	0	0	0	0	0	0	0	0	0	0	0	0	0	0	0	0	N/A	N/A	N/A	N/A	N/A
4081112430	25333.3	8133.8	0	239.264	16960.2	0	0	0	0	0	0	0	0	0	0	0	0	0	0	0	N/A	0	0	N/A	N/A	N/A	N/A
4081112530	198832	98232.1	73347.5	27252.9	1.14647e-07	0	0	0	0	0	0	0	0	0	0	0	0	0	0	0	0	0	0	N/A	N/A	N/A	N/A
4081112590	16268.7	4979.39	0	507.164	10782.1	0	0	0	0	0	0	0	0	0	0	0	0	0	0	0	N/A	0	0	N/A	N/A	N/A	N/A
4081112650	44404	24408.2	0	0	644.413	19351.4	0	0	0	0	0	0	0	0	0	0	0	0	0	0	N/A	N/A	0	0	N/A	N/A	N/A
4081112670	82787.7	38922.6	41056.5	2808.56	0	0	0	0	0	0	0	0	0	0	0	0	0	0	0	0	0	0	N/A	N/A	N/A	N/A	N/A
4081113100	25470.5	8895.55	3275.81	223.861	13075.3	0	0	0	0	0	0	0	0	0	0	0	0	0	0	0	0	0	0	N/A	N/A	N/A	N/A
4081113200	37666.3	27556.9	10109.4	0	0	0	0	0	0	0	0	0	0	0	0	0	0	0	0	0	0	N/A	N/A	N/A	N/A	N/A	N/A
4081113210	205295	93212.5	95355.1	16727.2	0	0	0	0	0	4562.58	4562.58	0	0	0	0	0	0	0	0.0222246	0.0489482	0	0	N/A	N/A	N/A	N/A	N/A
4081113270	72399	44475.2	0	224.003	27699.8	0	0	0	0	0	0	0	0	0	0	0	0	0	0	0	N/A	0	0	N/A	N/A	N/A	N/A
4081113460	116976	59862.4	36631.6	20482.3	0	0	0	0	0	0	0	0	0	0	0	0	0	0	0	0	0	0	N/A	N/A	N/A	N/A	N/A
4081113540	31434.4	19267.7	0	291.113	11875.6	0	0	0	0	0	0	0	0	0	0	0	0	0	0	0	N/A	0	0	N/A	N/A	N/A	N/A
4081113560	50173.4	7127.93	0	561.598	42483.9	0	0	0	0	0	0	0	0	0	0	0	0	0	0	0	N/A	0	0	N/A	N/A	N/A	N/A
4081113600	163413	83687.7	37007.4	42718	0	0	0	0	0	5732.9	5732.9	0	0	0	0	0	0	0	0.0350822	0.0685035	0	0	N/A	N/A	N/A	N/A	N/A
4081113660	71461	32020.2	4580.56	237.138	34623.1	0	0	0	0	0	0	0	0	0	0	0	0	0	0	0	0	0	0	N/A	N/A	N/A	N/A
4081113670	27646.6	12210.1	15436.5	0	0	0	0	0	0	0	0	0	0	0	0	0	0	0	0	0	0	N/A	N/A	N/A	N/A	N/A	N/A
4081113700	41826.3	23277.9	9294.51	9253.88	0	0	0	0	0	0	0	0	0	0	0	0	0	0	0	0	0	0	N/A	N/A	N/A	N/A	N/A
4081113710	265005	162427	38461.9	25950	28237.3	9928.48	0	0	0	21132.4	17938.5	3193.84	0	0	0	0	0	0	0.0797433	0.11044	0.083039	0	0	0	N/A	N/A	N/A
4081113740	38045.5	17193.3	231.656	0	20620.6	0	0	0	0	0	0	0	0	0	0	0	0	0	0	0	0	N/A	0	N/A	N/A	N/A	N/A
4081113750	117095	65165.4	26598.3	25331	0	0	0	0	0	0	0	0	0	0	0	0	0	0	0	0	0	0	N/A	N/A	N/A	N/A	N/A
4081113850	79718.6	27720	25209.9	468.18	26320.5	0	0	0	0	0	0	0	0	0	0	0	0	0	0	0	0	0	0	N/A	N/A	N/A	N/A
4081113860	247460	114736	82163.7	50560.2	0	0	0	0	0	41618.7	30694.9	10923.8	0	0	0	0	0	0	0.168184	0.267526	0.132952	0	N/A	N/A	N/A	N/A	N/A
4081114250	89114.3	47851.9	25313.3	15949.1	0	0	0	0	0	0	0	0	0	0	0	0	0	0	0	0	0	0	N/A	N/A	N/A	N/A	N/A
4081114260	10498.5	2534.22	2632.44	0	806.114	4525.71	0	0	0	0	0	0	0	0	0	0	0	0	0	0	0	N/A	0	0	N/A	N/A	N/A
4081114320	74544	29671.8	16206	736.294	27929.9	0	0	0	0	0	0	0	0	0	0	0	0	0	0	0	0	0	0	N/A	N/A	N/A	N/A
4081114370	419996	183811	116538	113423	6223.28	0	0	0	0	83178.4	45557.1	36353.6	1267.73	0	0	0	0	0	0.198046	0.247847	0.311946	0.011177	0	N/A	N/A	N/A	N/A
4081114550	385894	222830	78149.7	37878.7	47036.2	0	0	0	0	16063	16063	0	0	0	0	0	0	0	0.0416254	0.0720865	0	0	0	N/A	N/A	N/A	N/A
4081114560	317807	180233	83553.3	10228.2	43793.1	0	0	0	0	9697.92	9697.92	0	0	0	0	0	0	0	0.0305151	0.0538078	0	0	0	N/A	N/A	N/A	N/A
4081114570	589899	283050	128245	102067	2023.8	74512.5	0	0	0	0	0	0	0	0	0	0	0	0	0	0	0	0	0	0	N/A	N/A	N/A
4081114680	30428.7	14700.9	1107.8	0	223.982	14396	0	0	0	0	0	0	0	0	0	0	0	0	0	0	0	N/A	0	0	N/A	N/A	N/A
4081114800	207031	121348	39741.4	9012.99	36929.1	0	0	0	0	45112.2	31831.3	13280.9	0	0	0	0	0	0	0.2179	0.262314	0.334183	0	0	N/A	N/A	N/A	N/A
4081114810	84094.7	43834.8	19247.4	21012.5	0.00503635	0	0	0	0	0	0	0	0	0	0	0	0	0	0	0	0	0	0	N/A	N/A	N/A	N/A
4081114830	351258	162157	98718.8	16233.1	225.252	73924.4	0	0	0	46551	26908	13866.3	0	0	5776.71	0	0	0	0.132526	0.165938	0.140462	0	0	0.0781435	N/A	N/A	N/A
4081114920	766445	377162	219244	80565.9	89472.6	0.00515563	0	0	0	318370	156341	92407.6	34125.1	35496.4	0	0	0	0	0.415386	0.41452	0.421482	0.423568	0.396729	0	N/A	N/A	N/A
4081115130	196279	91206.9	67969	37102.9	0	0	0	0	0	0	0	0	0	0	0	0	0	0	0	0	0	0	N/A	N/A	N/A	N/A	N/A
4081115160	6045.4	0	322.285	0	5723.12	0	0	0	0	0	0	0	0	0	0	0	0	0	0	N/A	0	N/A	0	N/A	N/A	N/A	N/A
4081115510	113769	60088.2	12963.6	0	40717.6	0	0	0	0	0	0	0	0	0	0	0	0	0	0	0	0	N/A	0	N/A	N/A	N/A	N/A
4081115550	41594.1	30706.4	10887.7	0	0.00515643	0	0	0	0	0	0	0	0	0	0	0	0	0	0	0	0	N/A	0	N/A	N/A	N/A	N/A
4081115560	10368	0	0	513.25	9854.79	0	0	0	0	0	0	0	0	0	0	0	0	0	0	N/A	N/A	0	0	N/A	N/A	N/A	N/A
4081115570	333137	177624	92244.4	63268.7	0	0	0	0	0	0	0	0	0	0	0	0	0	0	0	0	0	0	N/A	N/A	N/A	N/A	N/A
4081115580	554727	292189	123766	109459	29312.3	0	0	0	0	198824	109856	64704.2	24262.9	0	0	0	0	0	0.358417	0.375977	0.522796	0.221661	0	N/A	N/A	N/A	N/A
4081115630	121605	42607.7	31050.2	47947.4	0	0	0	0	0	0	0	0	0	0	0	0	0	0	0	0	0	0	N/A	N/A	N/A	N/A	N/A
4081115710	136001	61840.1	36486.8	19524.1	18150.2	0	0	0	0	1458.54	1458.54	0	0	0	0	0	0	0	0.0107244	0.0235856	0	0	0	N/A	N/A	N/A	N/A
4081115720	78743.4	52728.3	26015.1	0	0	0	0	0	0	1209.59	1209.59	0	0	0	0	0	0	0	0.0153612	0.0229402	0	N/A	N/A	N/A	N/A	N/A	N/A
4081115830	13116	5470.3	4134.03	510.299	3001.34	0	0	0	0	0	0	0	0	0	0	0	0	0	0	0	0	0	0	N/A	N/A	N/A	N/A
4081115880	35290.7	13313.7	12170.7	9806.33	0	0	0	0	0	0	0	0	0	0	0	0	0	0	0	0	0	0	N/A	N/A	N/A	N/A	N/A
4081116100	47099.1	25839.6	21259.5	0	0	0	0	0	0	0	0	0	0	0	0	0	0	0	0	0	0	N/A	N/A	N/A	N/A	N/A	N/A
4081116130	136311	85589.3	28242.7	22479	0	0	0	0	0	29621	27916.1	1704.82	0	0	0	0	0	0	0.217304	0.326164	0.0603633	0	N/A	N/A	N/A	N/A	N/A
4081116140	108567	68314	14411.3	261.695	0	25580.2	0	0	0	0	0	0	0	0	0	0	0	0	0	0	0	0	N/A	0	N/A	N/A	N/A
4081116160	77300.8	43515.6	3969.25	515.365	29300.6	0	0	0	0	0	0	0	0	0	0	0	0	0	0	0	0	0	0	N/A	N/A	N/A	N/A
4081116200	90450.3	49210.4	20459	20780.9	0	0	0	0	0	45553.8	31265.2	14288.6	0	0	0	0	0	0	0.503633	0.635337	0.698401	0	N/A	N/A	N/A	N/A	N/A
4081116210	69328	25540.6	26080.9	17706.5	0	0	0	0	0	0	0	0	0	0	0	0	0	0	0	0	0	0	N/A	N/A	N/A	N/A	N/A
4081116220	93072.6	44223.1	13815.3	35034.2	0	0	0	0	0	13471	13304.6	166.394	0	0	0	0	0	0	0.144737	0.300852	0.0120442	0	N/A	N/A	N/A	N/A	N/A
4081116240	78178.4	40607.9	30063.8	7506.66	0	0	0	0	0	3452.23	3452.23	0	0	0	0	0	0	0	0.0441583	0.0850137	0	0	N/A	N/A	N/A	N/A	N/A
4081116260	74614.3	32206.4	26953.3	15454.6	0	0	0	0	0	9063.86	1171.61	7892.25	0	0	0	0	0	0	0.121476	0.0363781	0.292812	0	N/A	N/A	N/A	N/A	N/A
4081116280	227424	111751	41253.3	74419.8	0	0	0	0	0	54080.2	27670.2	20422.3	5987.68	0	0	0	0	0	0.237794	0.247606	0.495047	0.0804581	N/A	N/A	N/A	N/A	N/A
4081116350	125423	76963.4	25724.2	22735.5	0	0	0	0	0	12837.6	12150.1	687.45	0	0	0	0	0	0	0.102354	0.157869	0.0267238	0	N/A	N/A	N/A	N/A	N/A
4081116410	89721.2	51095.3	20748.3	17877.6	0	0	0	0	0	19030.9	19030.9	0	0	0	0	0	0	0	0.212111	0.372458	0	0	N/A	N/A	N/A	N/A	N/A
4081116430	163865	69800.4	36523.4	56273.3	1268.32	0	0	0	0	38369.3	16144.3	9266.15	11690.6	1268.32	0	0	0	0	0.234151	0.231292	0.253705	0.207746	1	N/A	N/A	N/A	N/A
4081116470	292329	153695	72022	21787.8	0	793.568	44031	0	0	0	0	0	0	0	0	0	0	0	0	0	0	0	N/A	0	0	N/A	N/A
4081116480	43252.3	18063.9	12272.7	455.25	0	12460.4	0	0	0	0	0	0	0	0	0	0	0	0	0	0	0	0	N/A	0	N/A	N/A	N/A
4081116490	112818	61850.3	24743.8	18802.9	7420.9	0	0	0	0	0	0	0	0	0	0	0	0	0	0	0	0	0	0	N/A	N/A	N/A	N/A
4081116560	49495.7	26059.3	3741.94	224.064	19470.4	0	0	0	0	30876.7	11573.3	2685.1	0	16618.2	0	0	0	0	0.623825	0.444115	0.717569	0	0.853512	N/A	N/A	N/A	N/A
4081116570	606110	314322	131048	69995.1	90745.5	0	0	0	0	0	0	0	0	0	0	0	0	0	0	0	0	0	0	N/A	N/A	N/A	N/A
4081116850	10261.8	6295.98	0	0	224.14	3741.65	0	0	0	0	0	0	0	0	0	0	0	0	0	0	N/A	N/A	0	0	N/A	N/A	N/A
4081116910	286861	159203	59359.7	10518.6	57779.4	0	0	0	0	0	0	0	0	0	0	0	0	0	0	0	0	0	0	N/A	N/A	N/A	N/A
4081117130	126852	75671.5	26067.6	25113.4	0	0	0	0	0	14285.4	14285.4	0	0	0	0	0	0	0	0.112614	0.188781	0	0	N/A	N/A	N/A	N/A	N/A
4081117140	141287	82899.9	38235.2	20151.6	0	0	0	0	0	1212.81	1212.81	0	0	0	0	0	0	0	0.00858405	0.0146299	0	0	N/A	N/A	N/A	N/A	N/A
4081117650	945625	495320	244939	118803	6880.07	321.979	0	0	79361.1	401105	224677	102080	73313.1	1034.59	0	0	0	0	0.424169	0.453601	0.416756	0.6171	0.150375	0	N/A	N/A	0
4081117700	621957	328126	180730	65097.4	48003.6	0	0	0	0	0	0	0	0	0	0	0	0	0	0	0	0	0	0	N/A	N/A	N/A	N/A
4081117840	40508.4	28757.9	6493.3	5257.19	0	0	0	0	0	0	0	0	0	0	0	0	0	0	0	0	0	0	N/A	N/A	N/A	N/A	N/A
4081117850	605792	323324	183568	56369	42531.1	0	0	0	0	372695	213625	98911.6	33934.9	26223.3	0	0	0	0	0.615219	0.660714	0.538828	0.602014	0.616567	N/A	N/A	N/A	N/A
4081117860	56616.3	22584.2	7570.87	0	806.688	25654.5	0	0	0	56616.3	22584.2	7570.87	0	806.688	25654.5	0	0	0	1	1	1	N/A	1	1	N/A	N/A	N/A
4081117920	2056.93	0	454.124	1602.8	0	0	0	0	0	0	0	0	0	0	0	0	0	0	0	N/A	0	0	N/A	N/A	N/A	N/A	N/A
4081118010	98832.9	47830.5	34849.5	16152.8	0	0	0	0	0	9385.66	7295.9	2089.76	0	0	0	0	0	0	0.0949649	0.152536	0.0599653	0	N/A	N/A	N/A	N/A	N/A
4081118020	34633.1	21665.5	12967.7	0	0	0	0	0	0	0	0	0	0	0	0	0	0	0	0	0	0	N/A	N/A	N/A	N/A	N/A	N/A
4081118040	102306	65915.4	24148.1	12242.4	0	0	0	0	0	57156.1	45234.6	11921.4	0	0	0	0	0	0	0.558678	0.686252	0.493679	0	N/A	N/A	N/A	N/A	N/A
4081118100	212631	130851	38600.6	39456.1	3723.12	0	0	0	0	114500	78968.9	20299.8	15231.3	0	0	0	0	0	0.538491	0.603501	0.525893	0.386031	0	N/A	N/A	N/A	N/A
4081118770	30222.2	11455.7	1093.47	0	322.422	17350.6	0	0	0	30222.2	11455.7	1093.47	0	322.422	17350.6	0	0	0	1	1	1	N/A	1	1	N/A	N/A	N/A
4081118830	357887	154996	107625	45204.7	224.144	0	49837.5	0	0	291876	122112	91476.7	45204.7	0	0	33082.5	0	0	0.815552	0.787839	0.849958	1	0	N/A	0.663808	N/A	N/A
4081119260	144143	68763.3	41834.9	0	224.169	33321	0	0	0	1147.57	733.036	414.537	0	0	0	0	0	0	0.00796133	0.0106603	0.00990888	N/A	0	0	N/A	N/A	N/A
4081119270	227688	119366	54111.3	18042.1	224.459	35944.2	0	0	0	0	0	0	0	0	0	0	0	0	0	0	0	0	0	0	N/A	N/A	N/A
4081119640	694721	347594	159943	85221.3	73542.4	28419.7	0	0	0	42780.4	34083	8697.42	0	0	0	0	0	0	0.0615793	0.0980539	0.0543782	0	0	0	N/A	N/A	N/A
4081119710	331962	180588	83480.2	51237.7	16656	0	0	0	0	9155.33	5718.55	3436.78	0	0	0	0	0	0	0.0275795	0.0316663	0.0411688	0	0	N/A	N/A	N/A	N/A
4081119870	56005.6	32421.4	23584.2	0	0	0	0	0	0	56005.6	32421.4	23584.2	0	0	0	0	0	0	1	1	1	N/A	N/A	N/A	N/A	N/A	N/A
4081119880	54731.8	30509.3	15110.7	9111.76	0	0	0	0	0	52853.3	28630.8	15110.7	9111.76	0	0	0	0	0	0.965678	0.938429	1	1	N/A	N/A	N/A	N/A	N/A
4081119900	85566.4	50041.8	11026.6	0	7.23706e-08	283.787	24214.2	0	0	85420.5	49986.2	11026.6	0	7.23706e-08	215.71	24191.9	0	0	0.998294	0.998889	1	N/A	1	0.760112	0.99908	N/A	N/A
4081120050	376944	191926	106893	59734.6	18390.5	0	0	0	0	376690	191901	106670	59729.1	18390.5	0	0	0	0	0.999326	0.999868	0.997911	0.999909	1	N/A	N/A	N/A	N/A
4081121020	135128	68217.4	38905.8	4448.67	322.584	0	23233.2	0	0	129460	67072.4	38532.8	4191.13	322.584	0	19341.5	0	0	0.958061	0.983216	0.990413	0.94211	1	N/A	0.832495	N/A	N/A
4081121030	135542	63491	52167.2	16473.5	3409.93	0	0	0	0	127356	61862.5	46374.8	15709	3409.93	0	0	0	0	0.939609	0.974351	0.888964	0.95359	1	N/A	N/A	N/A	N/A
4081121080	303852	177216	71248.8	42034.4	13352.6	0	0	0	0	110148	70987.4	25693.2	13467.8	0	0	0	0	0	0.362507	0.40057	0.360612	0.3204	0	N/A	N/A	N/A	N/A
4081121140	161246	93132.6	37012.5	31101.2	0	0	0	0	0	67452.6	43596.3	18022.7	5833.65	0	0	0	0	0	0.41832	0.46811	0.486936	0.18757	N/A	N/A	N/A	N/A	N/A
4081121470	363994	200579	89789.3	51257.8	22367	0	0	0	0	0	0	0	0	0	0	0	0	0	0	0	0	0	0	N/A	N/A	N/A	N/A
4081121610	70787.6	37596.1	19126.4	0	578.496	13486.5	0	0	0	19072.5	6669.4	1317.11	0	578.496	10507.5	0	0	0	0.269433	0.177396	0.0688636	N/A	1	0.779112	N/A	N/A	N/A
4081122050	323537	162330	113295	27488.5	20423.6	0	0	0	0	176387	87531.6	73705.5	5865.43	9284.42	0	0	0	0	0.545183	0.539221	0.650562	0.213377	0.454592	N/A	N/A	N/A	N/A
4081122060	62502.6	36020.5	10219.1	14202.3	2060.77	0	0	0	0	62502.6	36020.5	10219.1	14202.3	2060.77	0	0	0	0	1	1	1	1	1	N/A	N/A	N/A	N/A
4081122070	78600.3	35020.4	22340.5	21239.4	0	0	0	0	0	0	0	0	0	0	0	0	0	0	0	0	0	0	N/A	N/A	N/A	N/A	N/A
4081122170	86584.5	38710.7	22442	5782.93	322.68	19326.2	0	0	0	46126.9	25275.2	17586.1	1396.49	0	1869.23	0	0	0	0.532739	0.652925	0.783623	0.241486	0	0.0967196	N/A	N/A	N/A
4081122250	190801	121592	40293.1	28915.2	0	0	0	0	0	90992.4	68159.9	17600.1	5232.35	0	0	0	0	0	0.476898	0.560561	0.436802	0.180955	N/A	N/A	N/A	N/A	N/A
4081122260	128235	75546.7	43979.8	8708.92	0	0	0	0	0	45668.9	44550.7	1118.22	0	0	0	0	0	0	0.356134	0.589711	0.0254257	0	N/A	N/A	N/A	N/A	N/A
4081122300	96741.6	60746.4	17274	18721.1	0	0	0	0	0	0	0	0	0	0	0	0	0	0	0	0	0	0	N/A	N/A	N/A	N/A	N/A
4081122370	7400.48	0	0	231.656	0	7168.83	0	0	0	640.235	0	0	0	0	640.235	0	0	0	0.0865126	N/A	N/A	0	N/A	0.0893082	N/A	N/A	N/A
4081122420	229206	124640	60639.6	43925.4	0	0	0	0	0	218120	123890	59854.5	34375.4	0	0	0	0	0	0.951634	0.993977	0.987053	0.782586	N/A	N/A	N/A	N/A	N/A
4081122510	69884.3	33375.8	19294.4	17214	0	0	0	0	0	170.319	170.319	0	0	0	0	0	0	0	0.00243715	0.00510305	0	0	N/A	N/A	N/A	N/A	N/A
4081122520	5893.84	1269.58	0	0	454.528	0	4169.74	0	0	0	0	0	0	0	0	0	0	0	0	0	N/A	N/A	0	N/A	0	N/A	N/A
4081122560	14766.5	6539.6	0	554.365	7672.58	0	0	0	0	0	0	0	0	0	0	0	0	0	0	0	N/A	0	0	N/A	N/A	N/A	N/A
4081122630	487078	244925	116337	58225.4	67589.8	0	0	0	0	480148	243286	116337	58225.4	62298.6	0	0	0	0	0.985772	0.993309	1	1	0.921717	N/A	N/A	N/A	N/A
4081122690	724845	395303	147196	102864	0	226.407	79256	0	0	37501.4	24113.9	1560.21	2107.33	0	0	9720.01	0	0	0.0517371	0.061001	0.0105996	0.0204866	N/A	0	0.122641	N/A	N/A
4081122780	113645	57488.7	13080.9	23566	322.657	0	19186.4	0	0	58523.5	28013.2	13080.9	9856.37	275.226	0	7297.82	0	0	0.514969	0.487282	1	0.418245	0.852999	N/A	0.380365	N/A	N/A
4081122800	4691.16	161.943	0	291.104	0	0	4238.11	0	0	0	0	0	0	0	0	0	0	0	0	0	N/A	0	N/A	N/A	0	N/A	N/A
4081122840	431816	220191	135759	46274.4	29592.1	0	0.0103278	0	0	391293	197354	125720	41471.6	26747.8	0	0	0	0	0.906156	0.896287	0.926047	0.896211	0.903883	N/A	0	N/A	N/A
4081122850	128380	58543.8	16667.1	38317.2	14851.8	0	0.0103278	0	0	2258.83	2258.83	0	0	0	0	0	0	0	0.0175949	0.0385836	0	0	0	N/A	0	N/A	N/A
4081123420	459326	262912	92396.7	36145.3	291.768	0	0	0	67580.2	57791.7	52761.4	5030.21	0	0	0	0	0	0	0.125818	0.200681	0.0544415	0	0	N/A	N/A	N/A	0
4081123450	128837	49781.4	45470.9	33585	0	0	0	0	0	100493	41139.5	36870.1	22483.7	0	0	0	0	0	0.78	0.826402	0.81085	0.669455	N/A	N/A	N/A	N/A	N/A
4081123460	24669.3	14494.2	0	0	224.721	0	9950.35	0	0	13962.9	11570.5	0	0	0	0	2392.42	0	0	0.566006	0.798287	N/A	N/A	0	N/A	0.240435	N/A	N/A
4081123470	216481	110476	43532	47351.8	15121.1	0	0	0	0	195750	100159	43532	47349.7	4709.42	0	0	0	0	0.904237	0.906613	1	0.999956	0.311447	N/A	N/A	N/A	N/A
4081123570	112018	65617.8	24733.9	504.532	0	21161.9	0	0	0	40891.5	36494.2	4397.32	0	0	0	0	0	0	0.365044	0.556163	0.177785	0	N/A	0	N/A	N/A	N/A
4081123600	256726	132154	76764.1	3775.59	224.721	0	43807.9	0	0	122661	71125.6	49164.2	625.827	0	0	1745.18	0	0	0.477789	0.538204	0.640459	0.165756	0	N/A	0.0398371	N/A	N/A
4081123690	168665	92098.4	61456.3	231.668	14878.4	0	0	0	0	0	0	0	0	0	0	0	0	0	0	0	0	0	0	N/A	N/A	N/A	N/A
4081123700	182955	117791	20286.4	44877.7	0	0	0	0	0	0	0	0	0	0	0	0	0	0	0	0	0	0	N/A	N/A	N/A	N/A	N/A
4081124250	1.02457e+06	489496	273699	154531	17449.8	554.185	88840.5	0	0	33891.2	23975.9	9915.27	0	0	0	0	0	0	0.0330784	0.0489808	0.0362268	0	0	0	0	N/A	N/A
4081124290	566167	278506	151008	54733.3	14560.6	67357.7	0	0	0	163928	78469.6	49854.5	22997	9263.69	3343.71	0	0	0	0.289541	0.281752	0.330144	0.420164	0.636216	0.049641	N/A	N/A	N/A
4081124350	27408.8	15301.1	3299.36	322.792	8485.51	0	0	0	0	0	0	0	0	0	0	0	0	0	0	0	0	0	0	N/A	N/A	N/A	N/A
4081124400	91069.9	49268.6	19747.6	22053.7	0	0	0	0	0	1238.81	1238.81	0	0	0	0	0	0	0	0.0136029	0.0251441	0	0	N/A	N/A	N/A	N/A	N/A
4081124470	1828.91	0	0	224.862	1604.05	0	0	0	0	0	0	0	0	0	0	0	0	0	0	N/A	N/A	0	0	N/A	N/A	N/A	N/A
4081124550	548540	286311	119275	66230.7	19231.7	57491.9	0	0	0	102770	46199.1	7150.47	34013.5	5441.23	9965.5	0	0	0	0.187352	0.16136	0.0599497	0.51356	0.282931	0.173337	N/A	N/A	N/A
4081124730	785612	403246	222845	83677.1	55100.3	20743.2	0	0	0	576021	297159	140975	62043.8	55100.3	20743.2	0	0	0	0.733214	0.736917	0.632614	0.741467	1	1	N/A	N/A	N/A
4081124760	610577	304015	149167	121346	30860.5	5189.55	0	0	0	319562	156392	76582.9	68726.5	12671.7	5189.55	0	0	0	0.523378	0.514422	0.513405	0.56637	0.410611	1	N/A	N/A	N/A
4081125300	692529	368754	206317	65587.9	25826.7	26043.2	0	0	0	503205	290462	134328	41883	10488.1	26043.2	0	0	0	0.726619	0.787685	0.651078	0.638577	0.406096	1	N/A	N/A	N/A
4081125370	105460	52064.8	27139.1	0	0	461.867	25794.1	0	0	102704	49308.8	27139.1	0	0	461.867	25794.1	0	0	0.973867	0.947065	1	N/A	N/A	1	1	N/A	N/A
4081126020	520697	287534	124036	48577.3	60548.8	0	0	0	0	404036	218611	90526.4	38910.3	55988.1	0	0	0	0	0.775952	0.760295	0.729837	0.800997	0.924676	N/A	N/A	N/A	N/A
4081126030	205082	111484	37887.2	18983.4	0	322.787	0	0	36404.2	68490.7	31186.2	13712.5	2667.95	0	0	0	0	20924.1	0.333968	0.279737	0.361929	0.140542	N/A	0	N/A	N/A	0.574772
4081126710	86380.2	44899.5	12398.9	0	291.109	28790.6	0	0	0	0	0	0	0	0	0	0	0	0	0	0	0	N/A	0	0	N/A	N/A	N/A
4081126770	163050	87897.8	50907.6	24245	0	0	0	0	0	0	0	0	0	0	0	0	0	0	0	0	0	0	N/A	N/A	N/A	N/A	N/A
4081126930	508363	279053	88015.2	66627.8	291.113	0	74376.3	0	0	208181	141355	33853.7	16192.9	0	0	16779.4	0	0	0.409513	0.506553	0.384635	0.243035	0	N/A	0.225602	N/A	N/A
4081127010	287977	151926	57696.3	61280.6	17074.1	0	0.0103361	0	0	79535.2	27479.7	7247.63	35248.9	9558.9	0	0	0	0	0.276186	0.180875	0.125617	0.575206	0.559849	N/A	0	N/A	N/A
4081127510	295147	141143	97266.9	30330.7	26405.5	0	0	0	0	0	0	0	0	0	0	0	0	0	0	0	0	0	0	N/A	N/A	N/A	N/A
4081127640	113425	36777.8	54838	21809.3	0	0	0	0	0	0	0	0	0	0	0	0	0	0	0	0	0	0	N/A	N/A	N/A	N/A	N/A
4081127770	475511	255449	141488	53466.4	25107.1	0.00516904	0	0	0	57516.6	32193.2	20934.8	4388.62	0	0	0	0	0	0.120957	0.126026	0.147961	0.0820818	0	0	N/A	N/A	N/A
4081127840	11433.6	3468.67	0	0	323.066	7641.86	0	0	0	0	0	0	0	0	0	0	0	0	0	0	N/A	N/A	0	0	N/A	N/A	N/A
4081127920	377464	180951	97813.4	80977	17721.9	0	0	0	0	0	0	0	0	0	0	0	0	0	0	0	0	0	0	N/A	N/A	N/A	N/A
4081127950	18306.5	7773.39	0	0	490.656	10042.5	0	0	0	0	0	0	0	0	0	0	0	0	0	0	N/A	N/A	0	0	N/A	N/A	N/A
4081127980	78772.8	48148	15603.4	0	323.052	14698.4	0	0	0	0	0	0	0	0	0	0	0	0	0	0	0	N/A	0	0	N/A	N/A	N/A
4081128010	398582	196542	123923	28577.5	0	291.106	49248.5	0	0	114306	61554.6	30607.2	9252.08	0	291.106	12601.1	0	0	0.286782	0.313188	0.246986	0.323754	N/A	1	0.255869	N/A	N/A
4081128020	376624	201680	81455.4	68395.5	25093.2	0	0	0	0	181029	121576	50503.6	6226.38	2722.22	0	0	0	0	0.480661	0.602818	0.620016	0.0910349	0.108484	N/A	N/A	N/A	N/A
4081128040	124922	53617.5	17107.1	0	231.656	53966.2	0	0	0	0	0	0	0	0	0	0	0	0	0	0	0	N/A	0	0	N/A	N/A	N/A
4081128070	1529.58	0	0	0	0	560.347	969.234	0	0	0	0	0	0	0	0	0	0	0	0	N/A	N/A	N/A	N/A	0	0	N/A	N/A
4081128080	219655	109606	28968	81080.7	0	0	0	0	0	72024.1	45132.5	9606.77	17284.9	0	0	0	0	0	0.327897	0.41177	0.331634	0.213181	N/A	N/A	N/A	N/A	N/A
4081128090	478400	252286	103144	53096.6	0	0	69872.9	0	0	409828	212207	95524.7	45603	0	0	56493.5	0	0	0.856664	0.841133	0.926132	0.85887	N/A	N/A	0.808519	N/A	N/A
4081128120	129755	71334.7	27295.2	0	0	0	323.08	30802	0	22939.5	10549.2	1311.71	0	0	0	0	11078.6	0	0.176791	0.147883	0.0480567	N/A	N/A	N/A	0	0.35967	N/A
4081128130	132100	74196	20829.2	0	225.096	0	36850.1	0	0	70065.1	43254.5	12759.3	0	0	0	14051.3	0	0	0.530393	0.582976	0.612568	N/A	0	N/A	0.381309	N/A	N/A
4081128180	665665	353813	176026	24166.6	8393.22	0	0.00516927	103266	0	289481	154832	58854.3	18461.8	8245.57	0	0	49088	0	0.434876	0.437609	0.33435	0.76394	0.982408	N/A	0	0.475355	N/A
4081128230	190866	99499.2	39084.1	20303.6	322.947	0	0	0	31655.7	122412	50326.6	30584	9522.53	322.947	0	0	0	31655.7	0.64135	0.505799	0.782518	0.469006	1	N/A	N/A	N/A	1
4081128330	11096.8	3430.04	0	0	0	0	323.088	7343.71	0	871.532	0	0	0	0	0	0	871.532	0	0.0785388	0	N/A	N/A	N/A	N/A	0	0.118677	N/A
4081128580	63705.4	28073.4	0	323.048	35309	0	0	0	0	0	0	0	0	0	0	0	0	0	0	0	N/A	0	0	N/A	N/A	N/A	N/A
4081128590	286851	142294	62461.9	71974.2	10120.2	0	0	0	0	5097.42	4228.43	868.992	0	0	0	0	0	0	0.0177703	0.0297161	0.0139124	0	0	N/A	N/A	N/A	N/A
4081128660	160600	89224	29474	41902.1	0	0	0	0	0.0114584	39060	18602.7	18551.6	1905.68	0	0	0	0	0.0114584	0.243213	0.208494	0.629424	0.0454795	N/A	N/A	N/A	N/A	1
4081128670	149965	78636.7	35339.4	29569.8	0	0	0	225.222	6193.77	12981.8	5364.3	773.931	528.06	0	0	0	225.222	6090.27	0.0865655	0.0682162	0.0218999	0.0178581	N/A	N/A	N/A	1	0.983289
4081128880	103008	43462.4	29741.2	29804.4	0	0	0	0	0	43409.7	16328.7	10613.8	16467.2	0	0	0	0	0	0.42142	0.375697	0.356871	0.55251	N/A	N/A	N/A	N/A	N/A
4081128890	113981	71051.9	21929.5	21000.1	0	0	0	0	0	9417.95	7735.28	0	1682.67	0	0	0	0	0	0.0826271	0.108868	0	0.0801268	N/A	N/A	N/A	N/A	N/A
4081129210	147764	73390.1	46195.9	6661.84	0	0	21515.8	0	0	0	0	0	0	0	0	0	0	0	0	0	0	0	N/A	N/A	0	N/A	N/A
4081129220	246794	101675	77581.3	15648.5	51888.4	0	0.00517043	0	0	93261.2	45004.7	33984	13619.1	653.469	0	0	0	0	0.377892	0.442632	0.438044	0.87031	0.0125937	N/A	0	N/A	N/A
4081129270	704473	354635	192604	99518.3	231.66	0	0	57485.1	0	313777	158364	83845.3	33376.1	101.918	0	0	38090	0	0.445407	0.446555	0.435325	0.335377	0.439945	N/A	N/A	0.662608	N/A
4081129350	187598	87570.2	68668.1	27376.3	3983.48	0	0	0	0	187598	87570.2	68668.1	27376.3	3983.48	0	0	0	0	1	1	1	1	1	N/A	N/A	N/A	N/A
4081129400	141943	63427.7	48453.7	2193.33	323.077	0	27545.5	0	0	89854.2	46215.7	30729.4	0	289.243	0	12619.9	0	0	0.633028	0.728635	0.6342	0	0.895275	N/A	0.458146	N/A	N/A
4081129440	108374	63139.2	18483.1	26751.6	0	0	0	0	0	10566.8	10566.8	0	0	0	0	0	0	0	0.0975036	0.167358	0	0	N/A	N/A	N/A	N/A	N/A
4081129890	510717	283095	91136	26292.1	110194	0	0	0	0	61404.9	43371.1	7814.16	0	10219.6	0	0	0	0	0.120233	0.153203	0.0857418	0	0.0927423	N/A	N/A	N/A	N/A
4081129930	155681	92514.7	13845.1	675.732	0	48645.4	0	0	0	14227.4	3243.19	0	0	0	10984.2	0	0	0	0.0913882	0.035056	0	0	N/A	0.225802	N/A	N/A	N/A
4081130180	110161	62509.8	15090.5	12187.5	231.653	0	20141.3	0	0	4367.27	969.653	0	0	0	0	3397.62	0	0	0.0396445	0.015512	0	0	0	N/A	0.168689	N/A	N/A
4081130230	602395	283941	177849	60261.2	45220.6	35122.7	0.00942371	0	0	12295.5	0	0	0	0	12295.5	0.00942371	0	0	0.020411	0	0	0	0	0.350072	1	N/A	N/A
4081130370	995616	518568	247742	121817	100246	7244.11	0	0	0	402417	206243	72502.7	34413.5	82061.1	7197.12	0	0	0	0.404189	0.397716	0.292654	0.282502	0.818598	0.993513	N/A	N/A	N/A
4081130420	13690.7	7455.74	0	0	0	0	557.414	5677.55	0	13598.3	7455.73	0	0	0	0	557.414	5585.18	0	0.993253	0.999999	N/A	N/A	N/A	N/A	1	0.983731	N/A
4081130450	34342.1	16966.7	6182.83	0	455.273	0	0	10737.3	0	27996.9	16611.6	6151.75	0	350.692	0	0	4882.86	0	0.815235	0.979068	0.994973	N/A	0.77029	N/A	N/A	0.454758	N/A
4081130460	127298	70991.2	22278.1	7681.97	0	291.106	0	26055.2	0	117776	70390.6	21629.7	7601.86	0	147.181	0	18006.7	0	0.925202	0.99154	0.970894	0.989572	N/A	0.505592	N/A	0.691097	N/A
4081130470	708298	385617	168621	99560.5	41014.1	13485.6	0	0	0	120151	76124.3	11317.3	2678.54	22018.4	8012.27	0	0	0	0.169633	0.197409	0.0671169	0.0269037	0.53685	0.594134	N/A	N/A	N/A
4081130540	675729	332082	184861	85066.3	73719.4	0	0	0	0	564688	292383	146334	70711.2	55260.7	0	0	0	0	0.835673	0.880452	0.79159	0.831249	0.749608	N/A	N/A	N/A	N/A
4081130600	242438	133583	56236.3	26338.9	26279.8	0	0	0	0	242438	133583	56236.3	26338.9	26279.8	0	0	0	0	1	1	1	1	1	N/A	N/A	N/A	N/A
4081130610	173038	82021.4	45212.3	18865.2	521.663	26417.9	0	0	0	0	0	0	0	0	0	0	0	0	0	0	0	0	0	0	N/A	N/A	N/A
4081130690	126065	59373.9	42040.6	209.04	0	0	0	0	24441.3	20813.5	884.35	2757.3	209.04	0	0	0	0	16962.9	0.165102	0.0148946	0.0655865	1	N/A	N/A	N/A	N/A	0.694024
4081130720	167586	92359.9	10944.4	64282.1	0	0	0	0	0	159066	89061.8	10944.4	59059.5	0	0	0	0	0	0.949157	0.964291	1	0.918755	N/A	N/A	N/A	N/A	N/A
4081130770	247002	122038	63947.4	61016.5	0	0	0	0	0	0	0	0	0	0	0	0	0	0	0	0	0	0	N/A	N/A	N/A	N/A	N/A
4081130800	183100	91465.2	23754.4	29284.6	0	837.002	37758.8	0	0	175882	87369.4	23754.4	29284.6	0	0	35473.3	0	0	0.960577	0.95522	1	1	N/A	0	0.93947	N/A	N/A
4081130810	146346	60115.4	79480	6750.25	0	0	0	0	0	0	0	0	0	0	0	0	0	0	0	0	0	0	N/A	N/A	N/A	N/A	N/A
4081130840	8933.57	4079.23	0	0	231.653	0	4622.69	0	0	8933.57	4079.23	0	0	231.653	0	4622.69	0	0	1	1	N/A	N/A	1	N/A	1	N/A	N/A
4081130860	135121	48896.4	68879.5	0	231.653	17113.2	0	0	0	41957.1	11637.1	12975.1	0	231.653	17113.2	0	0	0	0.310515	0.237995	0.188374	N/A	1	1	N/A	N/A	N/A
4081130890	7139.23	694.969	0	0	0	297.893	6146.36	0	0	7139.23	694.969	0	0	0	297.893	6146.36	0	0	1	1	N/A	N/A	N/A	1	1	N/A	N/A
4081130930	248380	116136	73596.7	49319.8	9327	0.0051725	0	0	0	0	0	0	0	0	0	0	0	0	0	0	0	0	0	0	N/A	N/A	N/A
4081130940	165507	90733	18167.6	20315.3	0	36290.8	0	0	0	0	0	0	0	0	0	0	0	0	0	0	0	0	N/A	0	N/A	N/A	N/A
4081130960	4173.03	0	0	283.301	0	0	0	0	3889.73	0	0	0	0	0	0	0	0	0	0	N/A	N/A	0	N/A	N/A	N/A	N/A	0
4081131090	118930	50682	37693.6	30554.6	0	0	0	0	0	115658	50682	37693.6	27282.5	0	0	0	0	0	0.972488	1	1	0.892911	N/A	N/A	N/A	N/A	N/A
4081131160	83792.9	31026	21450.8	0	0	247.416	31068.8	0	0	53730.9	13627.6	8787.08	0	0	247.416	31068.8	0	0	0.641234	0.439232	0.40964	N/A	N/A	1	1	N/A	N/A
4081131190	342273	142713	98984.9	60624.6	39950	0	0.0103453	0	0	265404	96283.4	74368.9	54801.2	39950	0	0.0103453	0	0	0.775416	0.674664	0.751315	0.903944	1	N/A	1	N/A	N/A
4081131200	4126.11	1420.85	0	510.108	0	0	2195.15	0	0	4126.11	1420.85	0	510.108	0	0	2195.15	0	0	1	1	N/A	1	N/A	N/A	1	N/A	N/A
4081131210	212754	110478	56632.9	45642.8	0	0	0	0	0	165698	79275.2	43096.4	43326	0	0	0	0	0	0.778823	0.717565	0.760978	0.949241	N/A	N/A	N/A	N/A	N/A
4081131250	1.2477e+06	650553	274608	115608	98058	108875	0	0	0	476658	264445	106229	47614.9	43655.3	14713.2	0	0	0	0.382028	0.406493	0.38684	0.411866	0.445199	0.135138	N/A	N/A	N/A
4081131290	271357	133545	60749.8	40126.1	0	231.656	36704.3	0	0	269822	132870	60749.8	40126.1	0	0	36076.6	0	0	0.994343	0.994941	1	1	N/A	0	0.9829	N/A	N/A
4081131420	53323.2	34074.6	2950.76	0	0	323.27	15974.5	0	0	53323.2	34074.6	2950.76	0	0	323.27	15974.5	0	0	1	1	1	N/A	N/A	1	1	N/A	N/A
4081131430	571401	300426	142192	108904	19879.1	0	0	0	0	125901	40290.9	35072.1	33719	16819.4	0	0	0	0	0.220338	0.134112	0.246654	0.309621	0.846086	N/A	N/A	N/A	N/A
4081131460	147651	82170.8	29363.4	283.157	0	0	35833.8	0	0	83705.5	49569	7207.36	0	0	0	26929.1	0	0	0.566914	0.603244	0.245454	0	N/A	N/A	0.7515	N/A	N/A
4081131470	57057.3	22367.5	15562.6	19127.2	0	0	0	0	0	39027.5	15685.4	15562.6	7779.52	0	0	0	0	0	0.684005	0.701259	1	0.406725	N/A	N/A	N/A	N/A	N/A
4081131500	42302.1	20344.8	7573.22	477.729	13906.3	0	0	0	0	0	0	0	0	0	0	0	0	0	0	0	0	0	0	N/A	N/A	N/A	N/A
4081131530	114724	53450.9	31897.4	29375.5	0	0	0	0	0	0	0	0	0	0	0	0	0	0	0	0	0	0	N/A	N/A	N/A	N/A	N/A
4081131590	57570.4	39140.5	5621.21	12808.7	0	0	0	0	0	1037.34	0	0	1037.34	0	0	0	0	0	0.0180187	0	0	0.0809875	N/A	N/A	N/A	N/A	N/A
4081131600	6382.85	0	0	225.534	6157.31	0	0	0	0	0	0	0	0	0	0	0	0	0	0	N/A	N/A	0	0	N/A	N/A	N/A	N/A
4081131640	3561.46	0	0	0	231.66	0	3329.8	0	0	3561.46	0	0	0	231.66	0	3329.8	0	0	1	N/A	N/A	N/A	1	N/A	1	N/A	N/A
4081131650	462412	183354	145559	72922.3	60576.2	0	0	0	0	118702	39997.1	16859.6	29324.1	32520.9	0	0	0	0	0.256701	0.218142	0.115826	0.402129	0.536859	N/A	N/A	N/A	N/A
4081131660	327942	168513	73609.3	40939	44881.2	0	0	0	0	263418	128855	54726	40430.5	39407.2	0	0	0	0	0.803246	0.764659	0.743466	0.987578	0.878033	N/A	N/A	N/A	N/A
4081131670	402541	205195	135429	25549.1	36367.8	0	0	0	0	15949.2	11339.8	4609.33	0	0	0	0	0	0	0.0396212	0.0552637	0.034035	0	0	N/A	N/A	N/A	N/A
4081132340	46153.1	24799.9	11526.9	7.26726e-08	646.772	9179.62	0	0	0	0	0	0	0	0	0	0	0	0	0	0	0	0	0	0	N/A	N/A	N/A
4081132360	146885	73701.6	40872.1	32311.5	0	0	0	0	0	57258	36187.1	21070.9	0	0	0	0	0	0	0.389814	0.490995	0.515533	0	N/A	N/A	N/A	N/A	N/A
4081132450	181952	88182.3	45776.5	14245	33748.4	0	0	0	0	0	0	0	0	0	0	0	0	0	0	0	0	0	0	N/A	N/A	N/A	N/A
4081132510	3459.83	0	0	225.664	3234.17	0	0	0	0	0	0	0	0	0	0	0	0	0	0	N/A	N/A	0	0	N/A	N/A	N/A	N/A
4081132560	63396.2	32662.2	11865.7	18868.3	0	0	0	0	0	29972.3	6770.31	6407.51	16794.5	0	0	0	0	0	0.472778	0.207283	0.540004	0.890092	N/A	N/A	N/A	N/A	N/A
4081132570	78946.7	43647.1	11646.7	205.481	23447.4	0	0	0	0	59991	34918.4	4746.88	0	20325.7	0	0	0	0	0.759892	0.800015	0.407572	0	0.866865	N/A	N/A	N/A	N/A
4081132670	201486	102031	60892.5	38562.9	0	0	0	0	0	28164.5	18181.3	9983.2	0	0	0	0	0	0	0.139784	0.178194	0.163948	0	N/A	N/A	N/A	N/A	N/A
4081132710	249485	116112	54171.6	35693.2	43507.8	0	0	0	0	28812.5	20082.5	7578.77	1151.26	0	0	0	0	0	0.115488	0.172958	0.139903	0.0322544	0	N/A	N/A	N/A	N/A
4081132800	581113	344827	112851	103772	231.66	0.00517474	19430	0	0	198858	103249	4874.37	71072.2	231.66	0.00517474	19430	0	0	0.342202	0.299423	0.043193	0.684885	1	1	1	N/A	N/A
4081132850	80929	32431.3	17775.6	225.759	0	30496.4	0	0	0	39200.3	14438.3	9803.99	0	0	14958.1	0	0	0	0.484379	0.445196	0.551543	0	N/A	0.490486	N/A	N/A	N/A
4081132910	7355.03	676.969	0	455.487	6222.57	0	0	0	0	7091.03	676.969	0	455.487	5958.57	0	0	0	0	0.964106	1	N/A	1	0.957573	N/A	N/A	N/A	N/A
4081132920	832491	424680	233947	75714.4	98149.4	0	0	0	0	449972	228921	131778	32782.4	56491.4	0	0	0	0	0.540513	0.539042	0.563281	0.432975	0.575565	N/A	N/A	N/A	N/A
4081133050	663506	336433	191072	72501.9	5777.46	0	57720.8	0	0	324966	178826	56310.1	35141.7	1361.55	0	53327	0	0	0.489771	0.531534	0.294706	0.484701	0.235666	N/A	0.923877	N/A	N/A
4081133080	678275	350852	181649	74036.8	12139.9	59597.5	0	0	0	21988.4	7963.79	3409.23	0	0	10615.4	0	0	0	0.0324181	0.0226984	0.0187683	0	0	0.178118	N/A	N/A	N/A
4081133090	5576.54	0	0	0	0	323.421	5253.12	0	0	5576.54	0	0	0	0	323.421	5253.12	0	0	1	N/A	N/A	N/A	N/A	1	1	N/A	N/A
4081133100	795750	349327	217759	175640	45107.7	7915.73	0	0	0	516970	239805	146350	104565	22120.3	4130.16	0	0	0	0.649664	0.686476	0.672071	0.595339	0.49039	0.521766	N/A	N/A	N/A
4081133590	176848	107101	27651.1	38118.4	3977.46	0	0	0	0	84332.5	63506.6	16098.9	4072.3	654.694	0	0	0	0	0.476863	0.592957	0.582216	0.106833	0.164601	N/A	N/A	N/A	N/A
4081133660	496506	229992	126963	40006.3	99544.9	0	0	0	0	297338	147344	85718.1	30086.6	34189.8	0	0	0	0	0.598862	0.640649	0.675143	0.752048	0.343461	N/A	N/A	N/A	N/A
4081133850	114755	53628.7	36321.5	24804.9	0	0	0	0	0	0	0	0	0	0	0	0	0	0	0	0	0	0	N/A	N/A	N/A	N/A	N/A
4081133900	21642.8	8274.82	6396.2	0	549.302	6422.53	0	0	0	0	0	0	0	0	0	0	0	0	0	0	0	N/A	0	0	N/A	N/A	N/A
4081133910	106701	49698.2	33931.4	23071.4	0	0	0.00921385	0	0	95704	48620.9	33931.4	13151.6	0	0	0	0	0	0.896936	0.978325	1	0.570039	N/A	N/A	0	N/A	N/A
4081133920	281463	139530	95912.1	8693.73	0	0	37327.5	0	0	163491	92646	63724.8	4000.12	0	0	3120.18	0	0	0.580861	0.663987	0.664408	0.460116	N/A	N/A	0.0835892	N/A	N/A
4081134350	344672	156830	113240	43068.4	31534.8	0	0	0	0	2805.56	2805.56	0	0	0	0	0	0	0	0.0081398	0.0178893	0	0	0	N/A	N/A	N/A	N/A
4081134380	48018.4	21626.2	9043.71	0	534.477	16814	0	0	0	32377.2	16231	2701.41	0	534.477	12910.3	0	0	0	0.674266	0.750523	0.298706	N/A	1	0.76783	N/A	N/A	N/A
4081134410	205953	74234.8	38610.5	25825.5	67282	0	0	0	0	11516.4	10295.6	645.301	257.939	317.567	0	0	0	0	0.0559177	0.13869	0.0167131	0.00998776	0.00471993	N/A	N/A	N/A	N/A
4081134420	107993	49587.3	30186.7	28218.9	0	0	0	0	0	14256.7	7062.57	4659.6	2534.49	0	0	0	0	0	0.132015	0.142427	0.154359	0.0898153	N/A	N/A	N/A	N/A	N/A
4081134510	100941	43282.8	19626.2	38032.3	0	0	0	0	0	11764.4	4128.49	0	7635.96	0	0	0	0	0	0.116547	0.0953841	0	0.200776	N/A	N/A	N/A	N/A	N/A
4081134580	639819	326744	134153	84484.5	94437.6	0.0049129	0	0	0	196232	111087	53862.9	22024.5	9257.33	0.0049129	0	0	0	0.306699	0.339982	0.401505	0.260693	0.098026	1	N/A	N/A	N/A
4081134590	2719.03	0	0	265.414	0	2453.61	0	0	0	2719.03	0	0	265.414	0	2453.61	0	0	0	1	N/A	N/A	1	N/A	1	N/A	N/A	N/A
4081134660	136445	80859.3	21801.7	0	555.993	33227.8	0	0	0	84146	52469.1	11523.6	0	0	20153.3	0	0	0	0.616704	0.648894	0.528565	N/A	0	0.60652	N/A	N/A	N/A
4081134780	60501.8	31589.5	16560.2	246.176	0	0	12105.9	0	0	1037.85	1037.85	0	0	0	0	0	0	0	0.017154	0.0328543	0	0	N/A	N/A	0	N/A	N/A
4081134880	119841	46435.5	37646	35759.2	0	0	0	0	0	388.637	0	388.637	0	0	0	0	0	0	0.00324295	0	0.0103234	0	N/A	N/A	N/A	N/A	N/A
4081134930	79754.7	41839.9	37914.8	0	0	0	0	0	0	28551	22308.8	6242.24	0	0	0	0	0	0	0.357985	0.533193	0.164639	N/A	N/A	N/A	N/A	N/A	N/A
4081134940	384817	210561	81542.1	69185.7	23528.6	0	0	0	0	357540	194352	81268	69185.7	12734	0	0	0	0	0.929116	0.923021	0.996639	1	0.541215	N/A	N/A	N/A	N/A
4081135220	229553	106767	78019.8	18715.6	26050.4	0	0	0	0	146.615	0	0	0	146.615	0	0	0	0	0.000638699	0	0	0	0.00562814	N/A	N/A	N/A	N/A
4081135310	749410	408179	147473	111471	13227.8	549.987	68508.8	0	0	92846.6	62167.1	7760.94	19266.8	0	0	3651.86	0	0	0.123893	0.152303	0.0526261	0.172842	0	0	0.0533051	N/A	N/A
4081135720	374960	186437	116286	5817.8	0	0	0	0	66420.2	204812	100051	64442.8	5515.26	0	0	0	0	34803.6	0.546224	0.536647	0.554177	0.947997	N/A	N/A	N/A	N/A	0.523991
4081135750	238670	97304.1	89038.5	33902.3	18424.7	0	0	0	0	198558	90148.9	78409.7	19230.2	10769.2	0	0	0	0	0.831936	0.926466	0.880626	0.567226	0.584495	N/A	N/A	N/A	N/A
4081135810	457694	227587	124908	44701.9	0	323.431	60173.2	0	0	238456	106124	58516.2	13319.4	0	323.431	60173.2	0	0	0.520995	0.4663	0.468474	0.297959	N/A	1	1	N/A	N/A
4081135850	75701	15161.3	30609.8	0	244.074	29685.8	0	0	0	75701	15161.3	30609.8	0	244.074	29685.8	0	0	0	1	1	1	N/A	1	1	N/A	N/A	N/A
4081135860	2571.77	0	0	0	258.848	0	0	0	2312.92	0	0	0	0	0	0	0	0	0	0	N/A	N/A	N/A	0	N/A	N/A	N/A	0
4081135870	40138.7	14394.2	7501.14	225.808	0	18017.6	0	0	0	0	0	0	0	0	0	0	0	0	0	0	0	0	N/A	0	N/A	N/A	N/A
4081136200	73607.7	17380.5	12731.9	32889.5	0	225.939	10379.9	0	0	73607.7	17380.5	12731.9	32889.5	0	225.939	10379.9	0	0	1	1	1	1	N/A	1	1	N/A	N/A
4081136270	122417	60878.1	37502.5	0	284.116	23752.3	1.5221e-07	0	0	30676.2	12957.7	8220.87	0	0	9497.69	1.5221e-07	0	0	0.250588	0.212847	0.219208	N/A	0	0.399863	1	N/A	N/A
4081136630	144643	72974.5	42261.8	25093.5	4312.9	0	0	0	0	144643	72974.5	42261.8	25093.5	4312.9	0	0	0	0	1	1	1	1	1	N/A	N/A	N/A	N/A
4081136670	391161	194234	78065.6	92022.1	26839.1	0	0	0	0	290758	130714	52704.6	80597.3	26742.9	0	0	0	0	0.743322	0.67297	0.675132	0.875846	0.996415	N/A	N/A	N/A	N/A
4081136720	263696	143081	80064.9	33471.6	7079.28	0	0	0	0	3565.06	2626.23	938.826	0	0	0	0	0	0	0.0135195	0.0183549	0.0117258	0	0	N/A	N/A	N/A	N/A
4081136800	221523	99055.4	55675.4	25410.5	41381.7	0	0	0	0	50674.1	26328.3	6839.69	14780.6	2725.48	0	0	0	0	0.228753	0.265794	0.122849	0.581674	0.0658619	N/A	N/A	N/A	N/A
4081137150	74371.2	33678.9	14459.4	26233	0	0	0	0	0	65916.2	31558	14345.9	20012.4	0	0	0	0	0	0.886313	0.937025	0.992154	0.762869	N/A	N/A	N/A	N/A	N/A
4081137210	56876.4	29710.8	8959.23	226.131	0	17980.2	0	0	0	21617.5	14561.4	315.294	198.684	0	6542.12	0	0	0	0.380078	0.490104	0.035192	0.878625	N/A	0.363851	N/A	N/A	N/A
4081137270	140172	79575.2	16831.3	323.835	0	43441.6	0	0	0	0	0	0	0	0	0	0	0	0	0	0	0	0	N/A	0	N/A	N/A	N/A
4081137280	240245	116545	70280	34480.4	18940.3	0	0	0	0	0	0	0	0	0	0	0	0	0	0	0	0	0	0	N/A	N/A	N/A	N/A
4081137540	110069	52331.5	22678.2	24287.1	457.692	10315	0	0	0	0	0	0	0	0	0	0	0	0	0	0	0	0	0	0	N/A	N/A	N/A
4081137630	265104	134727	70342	34461.5	25573.9	0	0	0	0	47774.9	27063.3	19974.7	736.902	0	0	0	0	0	0.180212	0.200875	0.283965	0.0213833	0	N/A	N/A	N/A	N/A
4081137690	312464	128010	126038	31304	27112.3	0	0	0	0	17951.6	14736.6	3215.06	0	0	0	0	0	0	0.0574519	0.11512	0.0255087	0	0	N/A	N/A	N/A	N/A
4081137700	58100.1	25370.7	9506.7	0	809.817	22413	0	0	0	58100.1	25370.7	9506.7	0	809.817	22413	0	0	0	1	1	1	N/A	1	1	N/A	N/A	N/A
4081137720	161335	78970.9	18355.4	11049.8	0	52958.8	0	0	0	0	0	0	0	0	0	0	0	0	0	0	0	0	N/A	0	N/A	N/A	N/A
4081137730	217766	122938	69810.1	25017.9	0	0	0	0	0	217164	122914	69806.1	24444.5	0	0	0	0	0	0.997238	0.999805	0.999942	0.977081	N/A	N/A	N/A	N/A	N/A
4081137800	66558.2	31794.5	11075.2	23688.5	0	0	0	0	0	53092.5	27185.3	8217.28	17689.9	0	0	0	0	0	0.797684	0.855029	0.741952	0.746773	N/A	N/A	N/A	N/A	N/A
4081137910	107562	68618	22297.7	16646.3	0	0	0	0	0	268.399	0	0	268.399	0	0	0	0	0	0.0024953	0	0	0.0161237	N/A	N/A	N/A	N/A	N/A
4081137950	5135.34	0	0	323.751	4811.59	0	0	0	0	2030.99	0	0	1.21048e-07	2030.99	0	0	0	0	0.395494	N/A	N/A	3.73891e-10	0.422105	N/A	N/A	N/A	N/A
4081137980	126593	59168	28681.6	13983.3	455.935	24304	0	0	0	37534	21907.1	7816.84	7158.27	0	651.812	0	0	0	0.296494	0.370253	0.272538	0.511917	0	0.0268192	N/A	N/A	N/A
4081138160	478179	248669	142513	30259.9	0	213.877	56522.8	0	0	250709	96148.1	81903.9	17583.1	0	213.877	54859.8	0	0	0.524299	0.386651	0.574713	0.581068	N/A	1	0.970577	N/A	N/A
4081138170	722741	386409	183400	80040.6	72891.6	0	0	0	0	137906	91621.2	30711.1	3577.2	11996.5	0	0	0	0	0.19081	0.237109	0.167455	0.0446923	0.16458	N/A	N/A	N/A	N/A
4081138290	97742.1	46517.4	33984.1	13779.5	3461.15	0	0	0	0	91632.5	41935.7	33330.1	13779.5	2587.1	0	0	0	0	0.937492	0.901507	0.980756	1	0.74747	N/A	N/A	N/A	N/A
4081138300	67130.1	36752.3	20379.3	9998.54	0	0	0	0	0	40122.9	23665.1	14824.6	1633.3	0	0	0	0	0	0.597689	0.643907	0.727433	0.163354	N/A	N/A	N/A	N/A	N/A
4081138310	453288	239992	104348	36996	41090.4	30861.6	0	0	0	76456.2	54496.9	19596.9	0	2362.34	0	0	0	0	0.16867	0.227078	0.187804	0	0.0574911	0	N/A	N/A	N/A
4081138370	134482	82848.1	30643.8	20990.3	0	0	0	0	0	0	0	0	0	0	0	0	0	0	0	0	0	0	N/A	N/A	N/A	N/A	N/A
4081138440	777291	407183	211530	67047.7	54818.1	231.653	0	0	36480.4	178758	108448	64730.6	5579.24	0	0	0	0	0	0.229976	0.266338	0.306012	0.0832131	0	0	N/A	N/A	0
4081138450	281480	128707	70442.7	36431.2	0	45898.6	0	0	0	0	0	0	0	0	0	0	0	0	0	0	0	0	N/A	0	N/A	N/A	N/A
4081138490	24373.9	10344.6	0	0	206.008	13823.4	0	0	0	0	0	0	0	0	0	0	0	0	0	0	N/A	N/A	0	0	N/A	N/A	N/A
4081138540	133074	74225.7	32025.1	17975.5	8847.44	0	0	0	0	14395.7	8329.5	4072.15	0	1994.04	0	0	0	0	0.108178	0.112219	0.127155	0	0.225381	N/A	N/A	N/A	N/A
4081138550	111891	63511.1	16196.1	15701.1	456.073	16026.6	0	0	0	15404.4	11190.7	71.9146	0	232.815	3908.93	0	0	0	0.137673	0.176201	0.00444025	0	0.510479	0.243902	N/A	N/A	N/A
4081138600	97428.7	53621.7	17666.5	5554.76	226.236	20359.5	0	0	0	26574.2	17224.1	7292.13	2057.92	0	0	0	0	0	0.272755	0.321216	0.412765	0.370479	0	0	N/A	N/A	N/A
4081138630	41581.7	17769.6	13518	0	323.755	0	9970.3	0	0	0	0	0	0	0	0	0	0	0	0	0	0	N/A	0	N/A	0	N/A	N/A
4081138690	350909	161915	92283.7	60033.3	36676.5	0	0	0	0	82231.3	56443.5	25787.8	0	0	0	0	0	0	0.234338	0.348599	0.279441	0	0	N/A	N/A	N/A	N/A
4081138700	209562	119495	51225.5	4573.38	0	34267.4	0	0	0	1062.12	0	0	509.957	0	552.165	0	0	0	0.00506831	0	0	0.111506	N/A	0.0161134	N/A	N/A	N/A
4081138730	83606.3	39336.5	22997.3	21272.5	0	0	0	0	0	0	0	0	0	0	0	0	0	0	0	0	0	0	N/A	N/A	N/A	N/A	N/A
4081138820	81869.5	43750.9	20611.6	265.414	0	17241.5	0	0	0	27976.2	9927.04	9247.5	265.414	0	8536.2	0	0	0	0.341716	0.226899	0.448654	1	N/A	0.495095	N/A	N/A	N/A
4081138850	120429	52411	35880.1	30359.2	1778.77	0	0	0	0	16293.3	11045	5248.32	0	0	0	0	0	0	0.135294	0.210738	0.146274	0	0	N/A	N/A	N/A	N/A
4081138950	350562	170499	82218.8	9351.1	0	0	88493	0	0	2292.87	0	2292.87	0	0	0	0	0	0	0.00654057	0	0.0278875	0	N/A	N/A	0	N/A	N/A
4081138990	33127.2	15697.3	1747.79	0	231.66	15450.5	0	0	0	4440.83	4440.83	0	0	0	0	0	0	0	0.134054	0.282905	0	N/A	0	0	N/A	N/A	N/A
4081139070	139149	59224.5	44875.8	20241.5	14806.8	0	0	0	0	46677.2	23818.5	3566.83	16467.9	2824.04	0	0	0	0	0.335449	0.402173	0.0794822	0.813572	0.190726	N/A	N/A	N/A	N/A
4081139080	119187	64781.6	24851.7	6923.78	0	22630.1	0	0	0	21524.6	12428.9	6736.08	0	0	2359.56	0	0	0	0.180595	0.191859	0.271051	0	N/A	0.104266	N/A	N/A	N/A
4081139130	16550.2	12148.1	1758.64	0.00518151	237.144	2406.35	0	0	0	0	0	0	0	0	0	0	0	0	0	0	0	0	0	0	N/A	N/A	N/A
4081139140	274986	157479	60186.7	57320.7	0	0	0	0	0	158545	106732	29851.1	21961.7	0	0	0	0	0	0.576554	0.677752	0.495976	0.383137	N/A	N/A	N/A	N/A	N/A
4081139260	115154	70292	14722.5	0	647.763	29492	0	0	0	30260.3	26754.4	3071.78	0	167.529	266.636	0	0	0	0.262781	0.380617	0.208646	N/A	0.258628	0.00904095	N/A	N/A	N/A
4081139270	358307	169861	97163.5	73115.4	18167	0	0	0	0	308759	148013	90750.6	68645.5	1349.87	0	0	0	0	0.861717	0.871378	0.933999	0.938864	0.0743037	N/A	N/A	N/A	N/A
4081139450	320139	154816	70099.1	60581.5	14033.1	0	20609.6	0	0	41344.1	24774	9472.37	7097.78	0	0	0	0	0	0.129144	0.160022	0.135128	0.117161	0	N/A	0	N/A	N/A
4081139510	267617	134082	72130.5	61404.6	0	0	0	0	0	43408.2	32959.8	10448.4	0	0	0	0	0	0	0.162202	0.245817	0.144855	0	N/A	N/A	N/A	N/A	N/A
4081139580	727440	384650	203096	58191.5	81502.8	0	0	0	0	673025	356546	184930	58189.2	73359.9	0	0	0	0	0.925197	0.926938	0.910553	0.999961	0.90009	N/A	N/A	N/A	N/A
4081139660	95848.7	59462.5	19548.4	6698.37	10139.4	0	0	0	0	95848.7	59462.5	19548.4	6698.37	10139.4	0	0	0	0	1	1	1	1	1	N/A	N/A	N/A	N/A
4081139760	56019.8	28795.1	15739.2	11485.5	0	0	0	0	0	35351.3	20482.4	11299.8	3569.14	0	0	0	0	0	0.631051	0.711315	0.71794	0.310752	N/A	N/A	N/A	N/A	N/A
4081139870	65686.3	40887.7	16799.7	7998.91	0	0	0	0	0	64026.2	39227.6	16799.7	7998.91	0	0	0	0	0	0.974727	0.959399	1	1	N/A	N/A	N/A	N/A	N/A
4081139950	54592.7	31993.8	22598.9	0	0	0	0	0	0	13060.3	11480	1580.24	0	0	0	0	0	0	0.239231	0.35882	0.0699255	N/A	N/A	N/A	N/A	N/A	N/A
4081139970	214784	116560	38338.9	19328.3	0	231.66	0	0	40324.6	0	0	0	0	0	0	0	0	0	0	0	0	0	N/A	0	N/A	N/A	0
4081139980	28379.8	12656.3	2849.21	0	522.842	12351.5	0	0	0	0	0	0	0	0	0	0	0	0	0	0	0	N/A	0	0	N/A	N/A	N/A
4081140030	91151.1	46046.3	11843.1	456.287	0	32805.5	0	0	0	0	0	0	0	0	0	0	0	0	0	0	0	0	N/A	0	N/A	N/A	N/A
4081140110	15318.5	0	0	456.138	0	0	14862.4	0	0	0	0	0	0	0	0	0	0	0	0	N/A	N/A	0	N/A	N/A	0	N/A	N/A
4081140120	362841	201792	86300	28067.8	27277.1	226.265	19177.7	0	0	2242.82	2242.82	0	0	0	0	0	0	0	0.00618126	0.0111145	0	0	0	0	0	N/A	N/A
4081140150	268285	144407	77287.9	32174.4	14416.2	0	0	0	0	266501	143080	77287.9	32174.4	13958.8	0	0	0	0	0.99335	0.990813	1	1	0.968269	N/A	N/A	N/A	N/A
4081140180	32431	19223.2	2964.39	0	231.653	10011.7	0	0	0	24913.1	12498.6	2219.64	0	231.653	9963.17	0	0	0	0.768187	0.650183	0.748769	N/A	1	0.99515	N/A	N/A	N/A
4081140330	631121	306476	183596	80754.3	41920.1	18374	0	0	0	498331	270466	141969	67406.9	7783.01	10706.3	0	0	0	0.789597	0.882502	0.773268	0.834716	0.185663	0.582686	N/A	N/A	N/A
4081140380	428266	224950	109150	55234.6	38931.1	0	0	0	0	20974.7	9018.37	4828.92	0	7127.43	0	0	0	0	0.0489759	0.0400905	0.0442411	0	0.183078	N/A	N/A	N/A	N/A
4081140610	327343	160230	83705.7	21236.4	62171.4	0	0	0	0	130437	68899.7	29069.5	7966.27	24501.6	0	0	0	0	0.398472	0.430006	0.347282	0.375124	0.394098	N/A	N/A	N/A	N/A
4081140640	601888	308902	144960	108355	39670.4	0	0	0	0	16082.6	11364.5	4193	525.168	0	0	0	0	0	0.0267204	0.0367899	0.0289252	0.00484673	0	N/A	N/A	N/A	N/A
4081140800	81457.2	42408.6	23352.9	15695.7	0	0	0	0	0	0	0	0	0	0	0	0	0	0	0	0	0	0	N/A	N/A	N/A	N/A	N/A
4081140900	289745	152131	67241.5	26987	226.62	43158.2	0	0	0	0	0	0	0	0	0	0	0	0	0	0	0	0	0	0	N/A	N/A	N/A
4081141880	466396	224049	116780	56201.8	0	226.373	0	0	69138.8	0	0	0	0	0	0	0	0	0	0	0	0	0	N/A	0	N/A	N/A	0
4081141920	351879	188025	63395.5	28313.2	72145.5	0	0	0	0	0	0	0	0	0	0	0	0	0	0	0	0	0	0	N/A	N/A	N/A	N/A
4081142250	262072	146210	48227.7	6154.38	291.105	61188.7	0	0	0	0	0	0	0	0	0	0	0	0	0	0	0	0	0	0	N/A	N/A	N/A
4081142310	200468	116372	46656.6	21719.1	15719.9	0.0103702	0	0	0	0	0	0	0	0	0	0	0	0	0	0	0	0	0	0	N/A	N/A	N/A
4081142670	226849	122439	54275.2	41796.8	8338.25	0	0	0	0	0	0	0	0	0	0	0	0	0	0	0	0	0	0	N/A	N/A	N/A	N/A
4081142680	190678	91705.9	45544.8	4075.92	0	0	810.331	48541	0	0	0	0	0	0	0	0	0	0	0	0	0	0	N/A	N/A	0	0	N/A
4081142910	162919	68989.7	65604	22108.4	474.112	0	0	5742.74	0	0	0	0	0	0	0	0	0	0	0	0	0	0	0	N/A	N/A	0	N/A
4081142950	251894	130947	49884.8	71061.5	0	0	0	0	0	28542.7	19211.1	9331.53	0	0	0	0	0	0	0.113312	0.146709	0.187062	0	N/A	N/A	N/A	N/A	N/A
4081143790	103034	59212.6	26781.9	270.769	0	0	0	16768.8	0	0	0	0	0	0	0	0	0	0	0	0	0	0	N/A	N/A	N/A	0	N/A
4081143810	205320	107182	78799.9	19338.3	0	0	0	0	0	0	0	0	0	0	0	0	0	0	0	0	0	0	N/A	N/A	N/A	N/A	N/A
4081144060	6029.48	0	0	285.037	0.0107918	0	0	5744.43	0	0	0	0	0	0	0	0	0	0	0	N/A	N/A	0	0	N/A	N/A	0	N/A
4081144070	331686	171411	65751.2	46179.2	48344.5	0	0	0	0	0	0	0	0	0	0	0	0	0	0	0	0	0	0	N/A	N/A	N/A	N/A
4081144120	321079	165739	93719.5	29179	32441.6	0	0	0	0	321061	165724	93719.5	29176	32441.6	0	0	0	0	0.999943	0.999907	1	0.999897	1	N/A	N/A	N/A	N/A
4081144130	129938	61098.6	23756.1	29687.2	15396.1	0	0	0	0	101654	53855.4	16591.9	25905	5301.56	0	0	0	0	0.782325	0.88145	0.698427	0.872598	0.344344	N/A	N/A	N/A	N/A
4081144860	320113	139532	44996.8	31974.9	226.589	0	0	0	103383	0	0	0	0	0	0	0	0	0	0	0	0	0	0	N/A	N/A	N/A	0
4081144880	37278.9	15894.2	1760.36	0	324.231	0	0	19300.1	0.00462774	0	0	0	0	0	0	0	0	0	0	0	0	N/A	0	N/A	N/A	0	0
4081145530	284434	171394	75555.6	0	782.248	36701.3	0	0	0	76845.4	48285.8	25807.7	0	782.238	1969.59	0	0	0	0.27017	0.281723	0.341573	N/A	0.999987	0.0536653	N/A	N/A	N/A
4081145610	390174	224827	80890.7	79905.6	4550.18	0	0	0	0	85756.7	60522.7	13512	11721.9	0	0	0	0	0	0.219791	0.269197	0.16704	0.146697	0	N/A	N/A	N/A	N/A
4081146600	83540.4	26421.9	5635.16	0	0	0	0	239.119	51244.2	0	0	0	0	0	0	0	0	0	0	0	0	N/A	N/A	N/A	N/A	0	0
4081146620	474553	220738	126867	62299.2	49510.3	15138.6	0	0	0	0	0	0	0	0	0	0	0	0	0	0	0	0	0	0	N/A	N/A	N/A
4081147060	9674.27	0	0	0	0	227.164	0	0	9447.1	0	0	0	0	0	0	0	0	0	0	N/A	N/A	N/A	N/A	0	N/A	N/A	0
4081147130	187226	100377	32660.4	45368	8820.95	0	0	0	0	0	0	0	0	0	0	0	0	0	0	0	0	0	0	N/A	N/A	N/A	N/A
4081149870	162680	72290	57863.8	30255.4	2271.05	0	0	0	0	6454.32	4699.66	1754.66	0	0	0	0	0	0	0.0396749	0.0650112	0.030324	0	0	N/A	N/A	N/A	N/A
4081149890	346990	170773	60292.9	49966.4	487.31	0	0	0	65470.9	0	0	0	0	0	0	0	0	0	0	0	0	0	0	N/A	N/A	N/A	0
4081150200	975531	541941	149916	89526.5	324.358	193823	0	0	0	0	0	0	0	0	0	0	0	0	0	0	0	0	0	0	N/A	N/A	N/A
4081150220	851584	433213	197715	102253	118404	0.00578677	0	0	0	0	0	0	0	0	0	0	0	0	0	0	0	0	0	0	N/A	N/A	N/A
4081150230	877.158	0	0	0	227.617	649.541	0	0	0	0	0	0	0	0	0	0	0	0	0	N/A	N/A	N/A	0	0	N/A	N/A	N/A
4081150260	479317	229918	113773	73082.2	62544	0	0	0	0	18274.6	2875.11	6930.81	8468.69	0	0	0	0	0	0.0381263	0.012505	0.0609177	0.115879	0	N/A	N/A	N/A	N/A
4081150930	235837	111578	61762.4	17877.9	11898.8	32720.2	0	0	0	0	0	0	0	0	0	0	0	0	0	0	0	0	0	0	N/A	N/A	N/A
4081150940	107963	63220	13625.5	0	231.66	0	0	0	30886	0	0	0	0	0	0	0	0	0	0	0	0	N/A	0	N/A	N/A	N/A	0
4081151280	28768.1	13851.7	2868.22	8.87184e-08	0	357.914	0	0	11690.2	0	0	0	0	0	0	0	0	0	0	0	0	0	N/A	0	N/A	N/A	0
4081151310	71626.9	37261.2	16472.1	17893.6	0	0	0	0	0	0	0	0	0	0	0	0	0	0	0	0	0	0	N/A	N/A	N/A	N/A	N/A
4081151530	71601.8	33380.9	21782.9	974.766	0	0	0	0	15463.3	0	0	0	0	0	0	0	0	0	0	0	0	0	N/A	N/A	N/A	N/A	0
4081151550	70225.6	32297.7	16155.4	21772.4	0	0	0	0	0	0	0	0	0	0	0	0	0	0	0	0	0	0	N/A	N/A	N/A	N/A	N/A
4081152160	79486.1	46837.5	25085.9	7562.65	0	0	0	0	0	0	0	0	0	0	0	0	0	0	0	0	0	0	N/A	N/A	N/A	N/A	N/A
4081152170	202365	110902	35471.9	8166.96	0	0	0	0	47824.8	0	0	0	0	0	0	0	0	0	0	0	0	0	N/A	N/A	N/A	N/A	0
4081152560	153397	70251.3	61342.6	21803.1	0	0	0	0	0	0	0	0	0	0	0	0	0	0	0	0	0	0	N/A	N/A	N/A	N/A	N/A
4081152570	132523	56454.8	62672.6	13395.1	0	0	0	0	0	0	0	0	0	0	0	0	0	0	0	0	0	0	N/A	N/A	N/A	N/A	N/A
4081152760	101287	38161.2	22381.4	11242.6	0	0	0	0	29501.7	0	0	0	0	0	0	0	0	0	0	0	0	0	N/A	N/A	N/A	N/A	0
4081152770	72591.1	30625.5	22338.6	19627	0	0	0	0	0	0	0	0	0	0	0	0	0	0	0	0	0	0	N/A	N/A	N/A	N/A	N/A
4081153550	546162	262971	99820.7	38379.1	144991	0	0	0	0	4391.58	3711.15	0	680.423	0	0	0	0	0	0.00804079	0.0141124	0	0.017729	0	N/A	N/A	N/A	N/A
4081153580	105062	56607.6	30764.4	17689.7	0.00520621	0	0	0	0	0	0	0	0	0	0	0	0	0	0	0	0	0	0	N/A	N/A	N/A	N/A
4081154080	101410	47940.2	24591.1	10882.2	17996.4	0	0	0	0	23251.3	12504.8	10746.6	0	0	0	0	0	0	0.229281	0.260841	0.43701	0	0	N/A	N/A	N/A	N/A
4081154100	84256.7	49780.9	5101.65	29374.1	0	0	0	0	0	0	0	0	0	0	0	0	0	0	0	0	0	0	N/A	N/A	N/A	N/A	N/A
4081154300	827886	437932	210793	81643.3	97518.1	0	0	0	0	0	0	0	0	0	0	0	0	0	0	0	0	0	0	N/A	N/A	N/A	N/A
4081154320	22606.6	12352.7	1114.27	287.263	8852.37	0	0	0	0	0	0	0	0	0	0	0	0	0	0	0	0	0	0	N/A	N/A	N/A	N/A
4081574290	35261.7	25191.1	8511.41	1559.19	0	0	0	0	0	13199.6	10250.7	2948.88	0	0	0	0	0	0	0.374331	0.406916	0.346463	0	N/A	N/A	N/A	N/A	N/A
