# Supplementary material
Source: Research Square preprint supplement (doi:10.21203/rs.3.rs-9610239/v1)
Supplement: Supplementary file 2 [file be264eaa8ee579ff3b1ae49f.xlsx]

## Sheet: Sheet2
Supplementary Data 2. Fish biodiversity, river connectivity, barrier density, and protection efficiency across HydroBASINS Level 8 sub-basins in the Mekong River Basin. Columns B–E provide fish species richness metrics for each sub-basin, including total species richness and richness of selected conservation or ecological groups. Column F reports the Local Contribution to Beta Diversity (LCBD), i…
HYBAS_ID	Threaten_spc	Potadro	Diadro	Fish_tot	lcbd	Bar_den	ECOLOGICAL	DCIp	Headwater	Tributary	Main_channel	Unweighted_OPE	OPE
4080016840	12	81	11	325	0.000919	9	Delta	29	0	0	N/A	0	0
4080016900	9	70	9	272	0.0010059	6	Delta	33	0	0	N/A	0	0
4080016910	8	60	11	248	0.0010922	62	Delta	61	0	N/A	N/A	0	0
4080016920	11	75	9	295	0.0009432	5	Delta	35	0	0	N/A	0	0
4080016930	10	62	14	294	0.0010537	6	Delta	100	0.0770719	N/A	N/A	0.0770719	7.70719
4080016940	16	83	12	361	0.00081	2	Delta	41	0.00441499	0	N/A	0.00220749	0.220749
4080016950	10	63	13	302	0.0010283	0	Delta	40	0	0	N/A	0	0
4080016980	9	68	13	263	0.0010497	0	Delta	61	0	0	N/A	0	0
4080016990	10	66	12	261	0.0010766	0	Delta	87	0	0	N/A	0	0
4080017020	16	96	15	392	0.0007478	0	Delta	21.8018	0	0	0	0	0
4080017030	9	75	16	321	0.0009821	0	Delta	19	0	0	N/A	0	0
4080017110	1	51	9	203	0.0011444	0	Delta	79.2747	0	0	N/A	0	0
4080017120	1	36	10	151	0.0012577	0	Delta	72	0	N/A	N/A	0	0
4080017150	2	32	8	153	0.0012775	0	Delta	47	0	0	N/A	0	0
4080017160	1	27	9	158	0.0013034	1	Delta	18	0.284564	0.298353	N/A	0.291459	29.1459
4080017240	1	30	6	123	0.0012725	1	Delta	34.958	0.43255	0.339316	N/A	0.385933	38.5933
4080017250	1	29	10	147	0.00128	6	Delta	2	0.76892	0.857786	N/A	0.813353	81.3353
4080017390	1	51	7	197	0.0011251	4	Delta	64	0.313196	0.318486	N/A	0.315841	31.5841
4080017400	1	27	11	144	0.0012807	0	Delta	100	0.00552636	N/A	N/A	0.00552636	0.552636
4080017430	1	35	8	162	0.0011788	3	Delta	79	0.0196731	0.00052997	N/A	0.0101015	1.01015
4080017440	1	34	10	165	0.0011999	6	Delta	29	0.863167	1	N/A	0.931583	93.1583
4080017490	2	31	10	154	0.0012479	3	Delta	24	0.0670915	0.110172	N/A	0.0886317	8.86317
4080060240	21	76	0	208	0.0008509	0	Middle Mekong	100	0.86717	1	N/A	0.933585	93.3585
4080667790	0	0	0	2	0.0001776	0	Himalaya	100	1	1	N/A	1	100
4080667880	0	0	0	2	0.0001776	0	Himalaya	100	1	1	N/A	1	100
4080668740	0	0	0	2	0.0001776	0	Himalaya	100	1	1	N/A	1	100
4080668930	0	0	0	2	0.0001776	0	Himalaya	100	1	1	N/A	1	100
4080675030	0	0	0	2	0.0001776	0	Himalaya	100	1	1	N/A	1	100
4080675320	0	0	0	2	0.0001776	0	Himalaya	98.6919	1	1	N/A	1	100
4080675870	0	0	0	8	0.0006191	0	Himalaya	100	N/A	1	N/A	1	100
4080676090	0	0	0	3	0.0002846	0	Himalaya	100	1	1	N/A	1	100
4080676750	0	0	0	3	0.0002846	1	Himalaya	78.8827	1	1	N/A	1	100
4080676760	0	0	0	3	0.0002846	0	Himalaya	100	1	1	N/A	1	100
4080679040	0	0	0	8	0.0006191	4	Himalaya	51	1	1	N/A	1	100
4080679050	0	0	0	3	0.0002846	0	Himalaya	100	1	1	N/A	1	100
4080683140	0	0	0	3	0.0002846	0	Himalaya	100	1	1	N/A	1	100
4080683150	0	0	0	3	0.0002846	0	Himalaya	100	1	1	N/A	1	100
4080683740	0	0	0	3	0.0002846	0	Himalaya	100	1	1	N/A	1	100
4080683860	0	0	0	3	0.0002846	0	Himalaya	100	1	1	N/A	1	100
4080684900	0	0	0	3	0.0002846	0	Himalaya	100	1	1	N/A	1	100
4080685100	0	0	0	3	0.0002846	0	Himalaya	100	1	0.873081	N/A	0.936541	93.6541
4080685110	0	0	0	3	0.0002846	0	Himalaya	100	1	1	N/A	1	100
4080685120	0	0	0	3	0.0002846	0	Himalaya	100	1	N/A	N/A	1	100
4080685250	0	0	0	3	0.0002846	10	Himalaya	51.2174	1	1	N/A	1	100
4080685400	0	0	0	3	0.0002846	0	Himalaya	100	1	1	N/A	1	100
4080687190	0	0	0	8	0.0006191	0	Himalaya	100	1	1	N/A	1	100
4080687290	0	0	0	3	0.0002846	0	Himalaya	100	1	1	N/A	1	100
4080687300	0	0	0	8	0.0006191	0	Himalaya	100	N/A	1	N/A	1	100
4080687390	0	0	0	3	0.0002846	2	Himalaya	89.0786	1	1	N/A	1	100
4080687680	0	0	0	8	0.0006191	0	Himalaya	75	1	1	N/A	1	100
4080687900	0	0	0	3	0.0002846	0	Himalaya	100	1	1	N/A	1	100
4080688050	0	0	0	3	0.0002846	0	Himalaya	100	1	1	N/A	1	100
4080688220	0	0	0	3	0.0002846	0	Himalaya	100	0	0	N/A	0	0
4080688230	0	0	0	3	0.0002846	0	Himalaya	100	1	1	N/A	1	100
4080688340	0	0	0	3	0.0002846	0	Himalaya	100	0	0	N/A	0	0
4080690200	0	0	0	3	0.0002846	0	Himalaya	100	1	1	N/A	1	100
4080690510	0	0	0	3	0.0002846	0	Himalaya	100	0.440616	0.979083	N/A	0.709849	70.9849
4080691450	0	0	0	8	0.0006191	0	Himalaya	100	1	1	N/A	1	100
4080691460	0	0	0	3	0.0002846	0	Himalaya	100	1	1	N/A	1	100
4080691750	0	0	0	3	0.0002846	0	Himalaya	100	1	1	N/A	1	100
4080691960	0	0	0	3	0.0002846	0	Himalaya	100	0.0914994	0.42395	N/A	0.257725	25.7725
4080697110	0	0	0	3	0.0002846	3	Himalaya	68.4757	1	1	N/A	1	100
4080697440	0	0	0	3	0.0002846	0	Himalaya	100	1	1	N/A	1	100
4080697620	0	0	0	8	0.0006191	4	Himalaya	62.0763	1	1	N/A	1	100
4080697810	0	0	0	9	0.0006662	215	Himalaya	87.0039	1	N/A	N/A	1	100
4080699270	0	0	0	10	0.0006861	0	Himalaya	100	1	1	N/A	1	100
4080699410	0	0	0	3	0.0002846	21	Himalaya	45.8521	1	1	N/A	1	100
4080700840	0	0	0	4	0.0003922	0	Himalaya	100	1	1	N/A	1	100
4080701040	0	0	0	3	0.0002846	0	Himalaya	100	1	1	N/A	1	100
4080701360	0	0	0	3	0.0002846	0	Himalaya	100	0.95399	0.806342	N/A	0.880166	88.0166
4080701520	0	0	0	3	0.0002846	0	Himalaya	100	0	0	N/A	0	0
4080702680	0	0	0	3	0.0002846	3	Himalaya	56.1247	1	0.969359	N/A	0.984679	98.4679
4080702880	0	0	0	4	0.0003816	0	Himalaya	100	0	0	N/A	0	0
4080703390	0	0	0	3	0.0002846	0	Himalaya	100	0.103692	0	N/A	0.0518462	5.18462
4080703540	0	0	0	3	0.0002846	0	Himalaya	100	0	0	N/A	0	0
4080704210	0	0	0	10	0.0006861	0	Himalaya	100	1	1	N/A	1	100
4080704220	0	0	0	3	0.0002846	0	Himalaya	100	0	0.0124971	N/A	0.00624856	0.624856
4080704370	0	0	0	4	0.0003816	0	Himalaya	100	0.722818	0.435124	N/A	0.578971	57.8971
4080704380	0	0	0	4	0.0003816	0	Himalaya	100	0	0	N/A	0	0
4080704390	0	0	0	3	0.0002846	0	Himalaya	100	0	0	N/A	0	0
4080704680	0	0	0	3	0.0002846	0	Himalaya	100	0	0	N/A	0	0
4080705050	0	0	0	6	0.0005271	0	Himalaya	100	0.607877	0	0.222375	0.276751	27.6751
4080705180	0	0	0	8	0.0006248	0	Himalaya	100	0	0.16037	0	0.0534568	5.34568
4080706380	0	0	0	10	0.0007286	0	Himalaya	100	1	1	N/A	1	100
4080706630	0	0	0	3	0.0002846	0	Himalaya	100	1	N/A	N/A	1	100
4080706840	0	0	0	9	0.0006881	0	Himalaya	100	1	1	N/A	1	100
4080706850	0	0	0	3	0.0002846	0	Himalaya	100	1	N/A	N/A	1	100
4080709130	0	0	0	10	0.0006861	0	Himalaya	100	0	0	0	0	0
4080709300	0	0	0	4	0.0003816	0	Himalaya	100	0	N/A	N/A	0	0
4080711440	0	0	0	10	0.0006861	0	Himalaya	100	0	N/A	0	0	0
4080711580	0	0	0	4	0.0003816	0	Himalaya	100	0	0	N/A	0	0
4080713300	0	0	0	3	0.0002846	0	Himalaya	79	0.996222	0.913115	N/A	0.954669	95.4669
4080713390	0	0	0	9	0.0006881	0	Himalaya	87.6285	0.094037	0.00937343	N/A	0.0517052	5.17052
4080715800	0	0	0	2	0.0001842	0	Himalaya	100	0	0	N/A	0	0
4080715810	0	0	0	2	0.0001842	2	Himalaya	63.8613	1	1	N/A	1	100
4080715910	0	0	0	2	0.0001842	0	Himalaya	100	0	N/A	N/A	0	0
4080715920	0	0	0	2	0.0001842	0	Himalaya	100	0	0	N/A	0	0
4080718810	0	0	0	12	0.0007655	0	Himalaya	100	0	0	0	0	0
4080718820	0	0	0	9	0.0006553	3	Himalaya	46.8508	0	0	N/A	0	0
4080720320	0	0	0	12	0.0007655	0	Himalaya	100	0	0	0	0	0
4080720500	0	0	0	6	0.0005202	0	Himalaya	100	0	0	N/A	0	0
4080725930	0	0	0	9	0.0007549	2	Himalaya	83.7198	0.289384	0.683824	N/A	0.486604	48.6604
4080726290	0	0	0	4	0.0004942	0	Himalaya	100	0	0	N/A	0	0
4080727350	0	0	0	9	0.0007549	0	Himalaya	100	0	0	N/A	0	0
4080727660	0	0	0	5	0.0006058	0	Himalaya	100	0.551114	0.549262	N/A	0.550188	55.0188
4080730280	0	1	0	15	0.0008379	4	Himalaya	31.9584	0.0486151	0	0	0.016205	1.6205
4080730290	0	1	0	14	0.000816	0	Himalaya	100	0	0	0	0	0
4080745580	0	1	0	16	0.0008616	0	Himalaya	89.193	0	0	0	0	0
4080745590	0	0	0	9	0.0006441	9	Himalaya	62.5908	0	0	0	0	0
4080746370	0	1	0	16	0.0008616	0	Himalaya	100	N/A	0	0	0	0
4080746500	0	0	0	11	0.0007348	1	Himalaya	56.1286	0	0	N/A	0	0
4080746510	0	0	0	5	0.0004435	0	Himalaya	100	0	0	N/A	0	0
4080746660	0	0	0	5	0.0004435	0	Himalaya	100	0	0	N/A	0	0
4080747600	0	0	0	4	0.0003781	0	Himalaya	100	0	0	N/A	0	0
4080747730	0	0	0	5	0.0004435	0	Himalaya	100	0	0	N/A	0	0
4080748060	0	0	0	4	0.0003781	3	Himalaya	81.6561	0.0520893	0	N/A	0.0260446	2.60446
4080748070	0	0	0	4	0.0003781	1	Himalaya	72.4996	0.235801	0.133312	N/A	0.184557	18.4557
4080750020	0	0	0	4	0.0003781	10	Himalaya	50.9861	N/A	0	N/A	0	0
4080750290	0	0	0	4	0.0003816	0	Himalaya	100	0.00206147	0	N/A	0.00103074	0.103074
4080766740	0	1	0	17	0.0008566	0	Himalaya	95.5423	0	0	0	0	0
4080767050	0	0	0	7	0.0005638	0	Himalaya	100	0	0	N/A	0	0
4080773190	0	1	0	16	0.000859	0	Himalaya	57.5692	0	0	0	0	0
4080773200	0	0	0	8	0.0006298	0	Himalaya	100	0	0	N/A	0	0
4080782770	0	3	0	25	0.0009378	0	Himalaya	99.3541	0.26596	0.950514	0.30171	0.506061	50.6061
4080782900	0	2	0	15	0.0007195	6	Himalaya	40.0366	0	0	N/A	0	0
4080812830	0	3	0	32	0.0010217	0	Himalaya	98.9536	0.60718	0.953147	0.922679	0.827669	82.7669
4080812990	0	3	0	29	0.001016	0	Himalaya	100	0.293224	0.703219	N/A	0.498222	49.8222
4080818380	0	3	0	33	0.0010158	0	Himalaya	100	0.948145	1	1	0.982715	98.2715
4080818390	0	3	0	20	0.000825	0	Himalaya	100	1	1	N/A	1	100
4080823900	0	3	0	33	0.0010158	0	Himalaya	100	0.859553	1	1	0.953184	95.3184
4080824050	0	3	0	19	0.0008006	5	Himalaya	51	0.783375	1	N/A	0.891687	89.1687
4080849850	0	4	0	38	0.0010579	2	Himalaya	34.6377	0.270701	0.00818988	0.0637567	0.114216	11.4216
4080850070	0	4	0	33	0.0010291	36	Himalaya	22.6869	0.14441	0	N/A	0.0722048	7.22048
4080861460	0	4	0	46	0.001127	0	Himalaya	68	0.550676	0.964408	0.317071	0.610718	61.0718
4080861470	0	4	0	37	0.0010861	20	Himalaya	37.8353	0.222928	0.304609	N/A	0.263769	26.3769
4080863620	0	6	0	46	0.0012079	0	Himalaya	100	0.861071	0	0	0.287024	28.7024
4080863800	0	6	0	25	0.0009696	0	Himalaya	100	0.934651	N/A	N/A	0.934651	93.4651
4080870310	0	6	0	46	0.0012276	0	Himalaya	56.46	0.454319	N/A	0	0.22716	22.716
4080870320	0	6	0	21	0.000882	0	Himalaya	97	0.496917	0.155185	N/A	0.326051	32.6051
4080877140	0	6	0	48	0.0012405	3	Himalaya	52	0.511807	0	0.149466	0.220424	22.0424
4080877150	0	6	0	27	0.0010136	13	Himalaya	72.9076	0.877338	1	N/A	0.938669	93.8669
4080884980	0	6	0	52	0.0012675	3	Himalaya	78.0541	0.437133	1	0.354637	0.597257	59.7257
4080885150	0	6	0	34	0.0011118	0	Himalaya	100	0.83222	0.581702	N/A	0.706961	70.6961
4080887700	0	4	0	17	0.0008596	14	Himalaya	28.5595	0.105278	0	N/A	0.0526388	5.26388
4080887710	1	4	0	33	0.00115	27	Himalaya	14.1353	0.105728	0.199603	N/A	0.152665	15.2665
4080905860	2	8	0	62	0.0013038	1	Himalaya	55.2573	0.00646221	0	0	0.00215407	0.215407
4080905950	3	6	0	75	0.0013536	12	Himalaya	12.7128	0.259653	0.168045	N/A	0.213849	21.3849
4080906410	2	6	0	52	0.0012753	11	Himalaya	14.6098	0.0686286	0.150987	N/A	0.109808	10.9808
4080906600	2	6	0	43	0.0013159	11	Himalaya	36.3331	0.40909	0.695484	N/A	0.552287	55.2287
4080909370	2	7	0	57	0.0013249	11	Himalaya	79	0	0	0	0	0
4080909500	0	6	0	19	0.0008593	3	Himalaya	47.6302	0	0	N/A	0	0
4080915620	3	9	0	64	0.0013052	4	Himalaya	50.1818	0	0	0	0	0
4080915920	0	6	0	27	0.0009468	0	Himalaya	100	0	0	N/A	0	0
4080922260	3	8	0	78	0.001326	1	Himalaya	27.3384	0.0529811	0	0	0.0176604	1.76604
4080922270	0	7	0	34	0.001064	46	Himalaya	20.6785	0.0765959	0.0391333	N/A	0.0578646	5.78646
4080933180	3	10	0	78	0.0013089	0	Himalaya	100	0	0	0	0	0
4080933190	3	11	0	74	0.0013182	0	Himalaya	100	0.00140402	0	0	0.000468006	0.0468006
4080938280	5	11	0	78	0.0013114	6	Upper Mekong	43.775	0	0	N/A	0	0
4080938290	4	11	0	86	0.0013286	3	Upper Mekong	60	0.168549	0	0	0.0561832	5.61832
4080939020	0	6	0	35	0.0010173	78	Upper Mekong	37.8743	0	0	N/A	0	0
4080939190	5	10	0	75	0.0013155	0	Upper Mekong	100	0	0	N/A	0	0
4080940330	0	7	0	36	0.0010424	42	Upper Mekong	89.3434	0	0	N/A	0	0
4080940480	5	10	0	75	0.0013155	49	Upper Mekong	85.511	0	0	N/A	0	0
4080940790	1	7	0	39	0.001084	119	Upper Mekong	13.2353	0	0	N/A	0	0
4080941110	4	10	0	67	0.0012841	25	Upper Mekong	22.8165	0	0	N/A	0	0
4080941300	0	7	0	33	0.0009956	25	Upper Mekong	11.9342	0	0	N/A	0	0
4080941570	0	7	0	27	0.0008547	0	Upper Mekong	88.1211	0	0	N/A	0	0
4080948680	6	12	0	82	0.001315	0	Upper Mekong	97	0.175818	0.139822	0	0.105213	10.5213
4080948910	0	6	0	31	0.0009551	2	Upper Mekong	86.705	0.0824182	0	N/A	0.0412091	4.12091
4080952740	6	12	0	83	0.001324	0	Upper Mekong	70.7134	0	0	0	0	0
4080952930	1	8	0	34	0.0009934	46	Upper Mekong	26	0	0	N/A	0	0
4080962820	1	6	0	34	0.0010715	9	Upper Mekong	33.4069	0	0	N/A	0	0
4080962990	2	7	0	47	0.0011805	0	Upper Mekong	82.7425	0	0	N/A	0	0
4080967240	1	7	0	44	0.0011541	10	Upper Mekong	35.5274	0	0	N/A	0	0
4080967250	3	9	0	55	0.0012357	9	Upper Mekong	53.1859	0	0	N/A	0	0
4080967590	6	12	0	80	0.0013136	1	Upper Mekong	79.8033	0.488488	0.59721	0.55558	0.547092	54.7092
4080967750	0	7	0	36	0.0010291	3	Upper Mekong	48.4775	0.0299524	0.0352572	N/A	0.0326048	3.26048
4080971860	0	7	0	33	0.0010313	4	Upper Mekong	30.0151	0.586982	0.809874	N/A	0.698428	69.8428
4080972030	0	7	0	25	0.0009141	7	Upper Mekong	29.2792	0.219486	0	N/A	0.109743	10.9743
4080972580	2	9	0	36	0.0010553	47	Upper Mekong	9	0.0895674	0.00853667	N/A	0.049052	4.9052
4080972650	1	10	0	41	0.0011092	0	Upper Mekong	100	0.0921952	0	N/A	0.0460976	4.60976
4080972890	1	10	0	41	0.0011092	0	Upper Mekong	100	0	0	N/A	0	0
4080972990	0	6	0	20	0.0007849	17	Upper Mekong	31.274	0	0	N/A	0	0
4080976600	5	13	0	74	0.0012845	0	Upper Mekong	100	0	0	N/A	0	0
4080976610	6	12	0	83	0.0013073	0	Upper Mekong	65.3603	0	0	0	0	0
4080977110	5	13	0	81	0.0013101	3	Upper Mekong	57	0	0	N/A	0	0
4080977240	0	6	0	28	0.0008624	21	Upper Mekong	37.5627	0	0	N/A	0	0
4080981970	3	9	0	58	0.0012397	1	Upper Mekong	53	0.0953901	0.142413	N/A	0.118902	11.8902
4080981980	1	9	0	47	0.0011456	2	Upper Mekong	83	0	0	N/A	0	0
4080985650	3	10	0	59	0.0012222	0	Upper Mekong	100	0	0	N/A	0	0
4080985820	1	8	0	41	0.0010905	7	Upper Mekong	53.9543	0.0776478	0	N/A	0.0388239	3.88239
4080986490	8	17	0	91	0.0013036	0	Upper Mekong	58.2244	0.0328486	0.148228	0.0928481	0.0913082	9.13082
4080986500	3	10	0	69	0.0012584	0	Upper Mekong	100	0.329781	0.461756	N/A	0.395769	39.5769
4080990840	8	20	0	97	0.0013031	0	Upper Mekong	100	0.818793	1	1	0.939598	93.9598
4080990940	4	11	0	59	0.0011837	5	Upper Mekong	62.9819	0.142022	0.188793	N/A	0.165408	16.5408
4080999280	9	25	0	113	0.0012946	2	Upper Mekong	35.68	0.107948	0.0195791	0.366208	0.164578	16.4578
4080999290	3	15	0	60	0.0011771	12	Upper Mekong	25.2762	0.0818447	0.109099	N/A	0.0954721	9.54721
4081000250	3	9	0	42	0.0010537	33	Upper Mekong	26.0959	0.537397	0.719581	N/A	0.628489	62.8489
4081000260	8	31	0	127	0.0012905	6	Upper Mekong	16.5098	0.0602568	0.108587	N/A	0.0844217	8.44217
4081000320	9	26	0	117	0.0012849	0	Upper Mekong	61.7846	0.111276	0.708199	0.513216	0.44423	44.423
4081000530	3	15	0	63	0.0012101	4	Upper Mekong	61.168	0.0473891	0.000461009	N/A	0.0239251	2.39251
4081003150	1	7	0	26	0.0007978	14	Upper Mekong	15	0.00263457	0	N/A	0.00131728	0.131728
4081003160	0	7	0	24	0.0007242	8	Upper Mekong	50.4953	0	0	N/A	0	0
4081004390	4	15	0	58	0.0011183	0	Upper Mekong	77.3288	0.883005	1	N/A	0.941503	94.1503
4081004400	10	36	0	130	0.0012585	0	Upper Mekong	81.884	0.173063	0.589771	N/A	0.381417	38.1417
4081004850	3	10	0	51	0.0010608	10	Upper Mekong	66.0391	0	0	N/A	0	0
4081004860	3	11	0	59	0.001132	8	Upper Mekong	21.0291	0	0	N/A	0	0
4081004990	2	10	0	40	0.0009124	0	Upper Mekong	100	0.260913	0.4335	N/A	0.347206	34.7206
4081005080	3	12	0	57	0.001094	7	Upper Mekong	68.5962	0.252113	0.505322	N/A	0.378718	37.8718
4081006500	3	11	0	59	0.0011273	0	Upper Mekong	48.7511	0	0	N/A	0	0
4081006700	3	10	0	50	0.0010467	6	Upper Mekong	79	0	0	N/A	0	0
4081007260	9	41	2	169	0.0012174	2	Upper Mekong	29.4404	0.980644	0.997999	0.985698	0.988114	98.8114
4081007420	8	35	1	150	0.0012418	23	Upper Mekong	8	0.101764	0.178579	1	0.426781	42.6781
4081008200	9	38	0	137	0.0012487	3	Upper Mekong	52.5441	0.0441832	0.00970476	N/A	0.026944	2.6944
4081008210	6	16	0	62	0.0011359	19	Upper Mekong	54.6904	0	0	N/A	0	0
4081009620	1	10	0	27	0.0007045	0	Upper Mekong	100	0	0	N/A	0	0
4081009630	4	12	0	55	0.001159	3	Upper Mekong	31	0	0	N/A	0	0
4081010070	9	39	1	154	0.0012349	0	Upper Mekong	31.6712	0.43448	0.33873	N/A	0.386605	38.6605
4081010170	5	14	1	72	0.0011905	2	Upper Mekong	77	0.0238513	0.072927	N/A	0.0483892	4.83892
4081010870	1	9	0	23	0.0007375	21	Upper Mekong	23.0733	0	0	N/A	0	0
4081011110	2	9	0	26	0.0008166	4	Upper Mekong	32	0	0	N/A	0	0
4081011520	10	39	1	156	0.0012268	0	Upper Mekong	100	0	0	0	0	0
4081011680	11	43	2	182	0.0011899	0	Upper Mekong	82.4609	0.303471	0.399544	0.574011	0.425675	42.5675
4081012160	6	15	0	74	0.0011569	0	Upper Mekong	78.3468	0.669621	0.640574	N/A	0.655098	65.5098
4081012230	6	12	0	61	0.0011256	6	Upper Mekong	44.6725	0	0	N/A	0	0
4081014260	7	21	0	73	0.0012084	24	Upper Mekong	44.419	0	0	N/A	0	0
4081014270	3	13	0	35	0.0008569	7	Upper Mekong	43.2758	0	0	N/A	0	0
4081014470	4	17	0	49	0.0010633	3	Upper Mekong	73	0	0	N/A	0	0
4081014590	3	18	0	39	0.0009752	11	Upper Mekong	58.3053	0	0	N/A	0	0
4081015660	7	16	0	79	0.0011754	5	Upper Mekong	95.6687	0	0	N/A	0	0
4081015860	4	14	0	52	0.0010362	8	Upper Mekong	16.3759	0.000432475	0	N/A	0.000216237	0.0216237
4081016170	7	25	0	105	0.0012673	15	Upper Mekong	25.7423	0.354872	0	N/A	0.177436	17.7436
4081016380	12	37	0	168	0.0011931	5	Upper Mekong	49.1787	0.116405	0	N/A	0.0582027	5.82027
4081016390	7	17	0	85	0.001184	0	Upper Mekong	100	0	0	0	0	0
4081016400	3	15	0	59	0.001053	0	Upper Mekong	83.7905	0.646999	0.538862	N/A	0.592931	59.2931
4081017040	15	44	2	180	0.0011627	0	Upper Mekong	14.9883	0	0	0	0	0
4081017050	13	38	0	163	0.0011987	12	Upper Mekong	51.7912	0	0	0	0	0
4081018410	2	10	0	27	0.0008278	6	Upper Mekong	50.8874	0	0	N/A	0	0
4081018580	3	11	0	27	0.0008324	23	Upper Mekong	31.6095	0.0577729	0.00186631	N/A	0.0298196	2.98196
4081018590	7	21	0	72	0.0012077	4	Upper Mekong	65.0754	0	0	N/A	0	0
4081018600	4	12	0	36	0.000884	0	Upper Mekong	100	0	0	N/A	0	0
4081019350	6	20	0	95	0.0012211	7	Upper Mekong	50.2376	0.0972752	0.0181681	N/A	0.0577217	5.77217
4081019360	6	26	0	109	0.0012547	0	Upper Mekong	100	0	0	N/A	0	0
4081019460	7	17	0	85	0.001184	0	Upper Mekong	100	0	0	0	0	0
4081019470	3	15	0	59	0.0010588	0	Upper Mekong	100	0	0	N/A	0	0
4081019780	4	19	0	77	0.0011798	17	Upper Mekong	38	0.396753	0.193446	N/A	0.2951	29.51
4081019790	6	26	0	109	0.0012547	4	Upper Mekong	79.2579	0.19344	0.575507	N/A	0.384473	38.4473
4081019910	7	17	0	87	0.0011785	0	Upper Mekong	100	N/A	0	0	0	0
4081020060	3	15	0	59	0.0010588	0	Upper Mekong	79.7291	0	0	N/A	0	0
4081020150	6	24	0	111	0.0012622	14	Upper Mekong	15	0.913687	0.937717	N/A	0.925702	92.5702
4081020240	4	18	0	85	0.0012217	5	Upper Mekong	46	0.234381	0.148097	N/A	0.191239	19.1239
4081020580	6	21	0	73	0.001211	0	Upper Mekong	100	0	0	N/A	0	0
4081020650	2	12	0	34	0.0008949	4	Upper Mekong	79.0175	0	0	N/A	0	0
4081022090	8	30	0	105	0.0012145	1	Upper Mekong	83.4661	0	0	0	0	0
4081022100	11	45	0	161	0.001133	0	Upper Mekong	45.1782	0	0	0	0	0
4081023660	7	17	0	87	0.0011785	3	Upper Mekong	97	0	0	0	0	0
4081023670	3	15	0	60	0.0010582	5	Upper Mekong	45	0	0	N/A	0	0
4081025570	10	43	0	137	0.0011286	0	Upper Mekong	100	0	N/A	0	0	0
4081025630	6	26	0	87	0.0011034	0	Upper Mekong	100	0	0	N/A	0	0
4081026210	4	17	0	67	0.0010434	0	Upper Mekong	100	0	0	N/A	0	0
4081026350	6	20	0	76	0.0010998	11	Upper Mekong	65.4035	0.516775	0.427891	N/A	0.472333	47.2333
4081026620	7	18	0	92	0.0011695	7	Upper Mekong	85.8457	0	0	0	0	0
4081026710	6	20	0	77	0.001099	19	Upper Mekong	98	0	0	N/A	0	0
4081027230	4	17	0	62	0.0011564	5	Upper Mekong	16.2939	0.0517535	0.0421384	N/A	0.0469459	4.69459
4081027320	7	23	0	96	0.0011738	0	Upper Mekong	100	0	0	0	0	0
4081027480	6	20	0	76	0.0010992	10	Upper Mekong	93.4503	0	0	N/A	0	0
4081027560	4	17	0	66	0.0010303	0	Upper Mekong	100	0.0675329	0	N/A	0.0337665	3.37665
4081027700	10	44	0	140	0.0011115	0	Upper Mekong	100	0	0	0	0	0
4081027890	6	26	0	85	0.0010883	0	Upper Mekong	100	0	N/A	N/A	0	0
4081027950	3	18	0	57	0.0009975	0	Upper Mekong	100	0	0	N/A	0	0
4081027960	10	44	0	140	0.0011115	0	Upper Mekong	100	0	0	0	0	0
4081029060	8	26	0	104	0.0011483	0	Upper Mekong	100	0	0	0	0	0
4081029140	6	25	0	102	0.0011374	16	Upper Mekong	42.6921	0.803904	0.654837	N/A	0.729371	72.9371
4081029150	6	24	0	101	0.0011458	0	Upper Mekong	94	0	0	N/A	0	0
4081029160	3	16	0	66	0.0010633	0	Upper Mekong	100	0	0	N/A	0	0
4081030160	5	26	0	100	0.0011646	3	Upper Mekong	67.877	0.198106	0	N/A	0.0990529	9.90529
4081030240	12	50	0	152	0.0010603	0	Upper Mekong	100	0	0	0	0	0
4081030630	8	26	0	104	0.0011483	0	Upper Mekong	100	0	0	0	0	0
4081030730	3	15	0	64	0.001068	7	Upper Mekong	34.1276	0	0	N/A	0	0
4081030890	4	19	0	71	0.0010626	9	Upper Mekong	30.8153	0	0	N/A	0	0
4081030900	4	19	0	71	0.0010626	0	Upper Mekong	100	N/A	0	N/A	0	0
4081030970	4	18	0	67	0.0010354	19	Upper Mekong	31.8627	0	0	N/A	0	0
4081030980	6	21	0	84	0.001115	15	Upper Mekong	38.9758	0.211403	0.0252208	N/A	0.118312	11.8312
4081031350	11	43	0	126	0.0011063	0	Upper Mekong	100	0	0	0	0	0
4081031450	8	32	0	100	0.0010641	24	Upper Mekong	69.1947	N/A	0.122962	N/A	0.122962	12.2962
4081031460	8	26	0	104	0.0011522	0	Upper Mekong	100	0	0	0	0	0
4081031660	3	17	0	66	0.0010657	0	Upper Mekong	100	0	0	N/A	0	0
4081031930	8	32	0	100	0.0010641	8	Upper Mekong	82.9939	0.354262	0.0510901	N/A	0.202676	20.2676
4081032010	5	25	0	75	0.0011081	22	Upper Mekong	61.7709	0	N/A	N/A	0	0
4081032020	12	50	0	151	0.0010423	0	Upper Mekong	66.6138	0	0	0	0	0
4081032030	5	28	0	88	0.0010316	2	Upper Mekong	59.9066	0.21258	0.132651	N/A	0.172615	17.2615
4081032970	6	26	0	105	0.0011386	3	Upper Mekong	40.5975	0.524292	0.706829	N/A	0.615561	61.5561
4081033030	6	25	0	94	0.0011134	10	Upper Mekong	43.391	0	0.0140261	N/A	0.00701306	0.701306
4081033080	5	23	0	78	0.0009835	0	Upper Mekong	100	0.365443	0.00191913	N/A	0.183681	18.3681
4081033090	5	23	0	76	0.0009843	0	Upper Mekong	100	0.315896	0	N/A	0.157948	15.7948
4081033460	2	17	0	49	0.0009917	5	Upper Mekong	25.6696	0	0	N/A	0	0
4081033470	12	50	0	153	0.0010384	0	Upper Mekong	100	0	N/A	0	0	0
4081033690	2	13	0	42	0.0008148	19	Middle Mekong	25.8635	0	0	N/A	0	0
4081033770	2	13	0	42	0.0008148	0	Middle Mekong	100	0.792308	0.592933	N/A	0.69262	69.262
4081034660	2	11	0	25	0.0008076	0	Upper Mekong	100	0	0	N/A	0	0
4081034670	5	23	0	78	0.0009835	0	Upper Mekong	100	0	0	N/A	0	0
4081034730	2	11	0	26	0.0008053	0	Upper Mekong	100	0	N/A	N/A	0	0
4081034750	5	23	0	78	0.0009835	0	Upper Mekong	100	0	0	N/A	0	0
4081035250	5	23	0	78	0.0009835	0	Upper Mekong	100	0.062994	N/A	N/A	0.062994	6.2994
4081035260	5	23	0	78	0.0009835	0	Upper Mekong	54	0.318097	0	N/A	0.159049	15.9049
4081035930	5	21	0	82	0.0011137	4	Upper Mekong	53.197	0.266831	0.0568772	0	0.107903	10.7903
4081035940	9	31	0	113	0.0011456	3	Upper Mekong	86.9247	0	0	0	0	0
4081036060	2	11	0	25	0.0008076	3	Upper Mekong	92.4254	0	0	N/A	0	0
4081036150	2	11	0	25	0.0008076	6	Upper Mekong	75	0	0	N/A	0	0
4081036980	2	11	0	25	0.0008076	0	Upper Mekong	100	0	0	N/A	0	0
4081036990	2	11	0	25	0.0008076	0	Upper Mekong	68.3781	0	0	N/A	0	0
4081037370	2	14	0	44	0.0008191	0	Middle Mekong	100	0	0	N/A	0	0
4081037380	2	14	0	44	0.0008191	0	Middle Mekong	100	0.0289451	0	N/A	0.0144726	1.44726
4081038100	2	11	0	25	0.0008076	0	Upper Mekong	100	0	0	N/A	0	0
4081038140	2	11	0	25	0.0008076	0	Upper Mekong	100	0	N/A	N/A	0	0
4081038650	8	36	0	120	0.0010664	6	Upper Mekong	61.7034	0	N/A	N/A	0	0
4081038760	14	67	1	204	0.0008817	0	Upper Mekong	100	0	0	0	0	0
4081038830	8	37	0	116	0.0010634	22	Upper Mekong	43.963	0	0	N/A	0	0
4081038940	14	70	0	207	0.0008723	0	Upper Mekong	36.8716	0	0	0	0	0
4081039130	14	67	1	204	0.0008817	0	Upper Mekong	100	0	N/A	0	0	0
4081039180	2	23	0	81	0.0010784	6	Upper Mekong	17.817	0	0	N/A	0	0
4081039190	13	58	0	168	0.0010117	0	Upper Mekong	41.0095	0.177619	0	0.00143209	0.0596837	5.96837
4081039200	10	33	1	113	0.0010989	4	Upper Mekong	35.8293	0.653895	0.541912	N/A	0.597904	59.7904
4081039500	10	37	0	119	0.0011222	0	Upper Mekong	100	0	0	0	0	0
4081039570	5	29	0	101	0.001106	7	Upper Mekong	22.6158	0.0167541	0	N/A	0.00837705	0.837705
4081040610	13	63	0	186	0.0009335	0	Upper Mekong	46.9356	0	0	0	0	0
4081040780	5	35	0	112	0.001093	4	Upper Mekong	60.6215	0.0131335	0	N/A	0.00656677	0.656677
4081040790	14	70	0	207	0.0008723	0	Upper Mekong	100	N/A	0	0	0	0
4081040800	14	70	0	207	0.0008723	0	Upper Mekong	100	N/A	0	0	0	0
4081040840	10	55	0	171	0.0009851	2	Upper Mekong	12.7416	0	0	N/A	0	0
4081040850	9	44	0	134	0.0010297	21	Upper Mekong	31.3656	0	0	0	0	0
4081041310	16	71	1	211	0.0008623	0	Upper Mekong	92.4645	0	0	0	0	0
4081041330	9	55	1	164	0.0009791	7	Upper Mekong	13.2756	0	0	N/A	0	0
4081041350	6	27	0	106	0.0011165	1	Upper Mekong	66.0283	0.122263	0.00760592	N/A	0.0649346	6.49346
4081041480	6	27	0	98	0.0011005	10	Upper Mekong	57.1659	0	0	N/A	0	0
4081041900	2	17	0	49	0.0008485	2	Middle Mekong	77.2679	0.0443976	0	N/A	0.0221988	2.21988
4081041950	2	16	0	49	0.0008625	8	Middle Mekong	28	0.212856	0	N/A	0.106428	10.6428
4081042230	6	29	0	110	0.0011037	2	Upper Mekong	98.857	0.0985954	0	N/A	0.0492977	4.92977
4081042320	6	28	0	103	0.0010981	0	Upper Mekong	41	0	0	N/A	0	0
4081042400	2	12	0	32	0.0008116	12	Upper Mekong	37.4471	0	0	N/A	0	0
4081042410	2	12	0	35	0.0008355	21	Upper Mekong	74.2694	0	0	N/A	0	0
4081042900	18	74	0	213	0.0008474	0	Upper Mekong	12.7608	0	0	0	0	0
4081043000	5	28	0	107	0.0011019	0	Upper Mekong	100	0	0	N/A	0	0
4081043580	20	82	0	240	0.0007747	0	Upper Mekong	81.1872	0	0	0	0	0
4081043590	13	58	0	181	0.0009737	4	Upper Mekong	69.5341	0	0	0	0	0
4081043740	2	16	0	49	0.0009522	0	Upper Mekong	100	0	0.0472988	N/A	0.0236494	2.36494
4081043920	1	20	0	79	0.0010941	13	Upper Mekong	14	0.279509	0.0206011	N/A	0.150055	15.0055
4081044950	8	38	0	130	0.0010825	0	Middle Mekong	87.2015	0	0	N/A	0	0
4081045050	6	36	0	120	0.0010767	4	Middle Mekong	76.5906	0	0	N/A	0	0
4081045130	21	85	0	243	0.0007627	0	Middle Mekong	100	0	0	0	0	0
4081045140	8	38	0	130	0.0010825	0	Middle Mekong	100	N/A	0	N/A	0	0
4081045660	5	26	0	96	0.0010747	42	Upper Mekong	28.8316	0	0	N/A	0	0
4081045730	5	29	0	93	0.0010875	0	Upper Mekong	95.8894	0.296758	0.235752	N/A	0.266255	26.6255
4081045740	4	36	0	101	0.0010836	2	Upper Mekong	58.191	0.166092	0.00270342	N/A	0.0843975	8.43975
4081045790	2	17	0	71	0.0010292	45	Upper Mekong	44.8212	0.146656	0	N/A	0.0733278	7.33278
4081045940	19	86	0	242	0.0007681	0	Middle Mekong	57.6676	0	0	0	0	0
4081045990	10	52	0	174	0.0010015	3	Middle Mekong	52	0	0	N/A	0	0
4081046070	3	20	0	73	0.0010387	2	Middle Mekong	61.253	0.55701	0.444751	N/A	0.500881	50.0881
4081046170	18	75	0	216	0.0008382	0	Upper Mekong	100	0	0	0	0	0
4081046180	5	33	0	114	0.0010834	10	Upper Mekong	13	0	0	N/A	0	0
4081046330	3	20	0	74	0.0010445	0	Middle Mekong	79.5792	0.268006	0.236521	N/A	0.252263	25.2263
4081046820	9	42	0	127	0.0010505	0	Upper Mekong	94.6693	0	0	N/A	0	0
4081046960	18	75	0	219	0.0008218	0	Upper Mekong	100	0	0	0	0	0
4081047660	18	75	0	214	0.0008492	0	Upper Mekong	100	0	0	0	0	0
4081047710	5	37	0	125	0.0010412	64	Upper Mekong	36.7981	0	0	N/A	0	0
4081047720	6	37	0	123	0.0010251	5	Upper Mekong	26.5275	0	0	N/A	0	0
4081047770	18	75	0	213	0.0008409	0	Upper Mekong	82.0246	0	0	0	0	0
4081047880	7	49	0	151	0.0009967	7	Upper Mekong	27	0	0	N/A	0	0
4081047890	8	44	0	133	0.0010343	12	Upper Mekong	40.9993	0	0	N/A	0	0
4081048880	4	34	0	112	0.0010587	0	Middle Mekong	94.5079	0	0	N/A	0	0
4081048980	10	52	0	174	0.0010015	0	Middle Mekong	100	0	0	N/A	0	0
4081049440	3	22	0	87	0.0010731	3	Middle Mekong	59.929	0.129255	0.144219	N/A	0.136737	13.6737
4081049600	4	25	0	94	0.0010763	2	Middle Mekong	78	0	0	N/A	0	0
4081049700	4	29	0	89	0.0009853	2	Middle Mekong	53.1042	0	0	N/A	0	0
4081049780	5	30	0	106	0.0010808	3	Middle Mekong	50.1482	0	0	N/A	0	0
4081049950	3	37	0	114	0.0010417	15	Upper Mekong	11	0	0	N/A	0	0
4081049960	5	23	0	84	0.0010133	35	Upper Mekong	9.63649	0.23808	0	N/A	0.11904	11.904
4081050260	1	15	0	61	0.0009506	10	Upper Mekong	44.2345	0	0	N/A	0	0
4081050380	3	34	0	96	0.0010669	20	Upper Mekong	66.3078	0.354211	0	N/A	0.177106	17.7106
4081050750	1	16	0	62	0.0009525	29	Upper Mekong	39.4335	0.176105	0	N/A	0.0880525	8.80525
4081050890	3	34	0	96	0.0010697	20	Upper Mekong	36.6196	0.389508	0	N/A	0.194754	19.4754
4081052600	5	21	0	89	0.0010811	11	Middle Mekong	27.2187	0	0	N/A	0	0
4081052720	5	23	0	91	0.0010327	15	Middle Mekong	49.9753	0	0	N/A	0	0
4081053310	2	36	0	112	0.0010468	8	Upper Mekong	52.1783	0	0	N/A	0	0
4081053350	2	26	0	95	0.0010301	47	Upper Mekong	45.4299	0.186234	0	N/A	0.0931171	9.31171
4081053580	1	20	0	75	0.0009824	10	Upper Mekong	13.929	0.062126	0	N/A	0.031063	3.1063
4081053650	1	16	0	63	0.0009556	0	Upper Mekong	100	0	0	N/A	0	0
4081053660	2	37	0	109	0.0010806	17	Upper Mekong	24.6371	0.0955665	0	N/A	0.0477832	4.77832
4081053770	3	34	0	96	0.0010697	3	Upper Mekong	66.6034	0.0908328	0	N/A	0.0454164	4.54164
4081054640	8	34	0	114	0.0009949	7	Middle Mekong	91.0809	0	0	N/A	0	0
4081054650	5	26	0	93	0.0010393	0	Middle Mekong	100	0	0	N/A	0	0
4081054660	5	27	0	98	0.0010385	6	Middle Mekong	44.1223	0	0	N/A	0	0
4081054710	8	34	0	110	0.0009992	0	Middle Mekong	100	0	N/A	N/A	0	0
4081055020	8	34	0	114	0.0009949	0	Middle Mekong	100	0	0	N/A	0	0
4081055070	8	33	0	112	0.0010096	2	Middle Mekong	71.5526	0	0	N/A	0	0
4081056790	6	29	0	97	0.0009961	33	Middle Mekong	56.2858	0	0	N/A	0	0
4081056800	6	29	0	97	0.0009981	8	Middle Mekong	42.2363	0	0	N/A	0	0
4081056990	9	49	0	157	0.0009802	8	Middle Mekong	50.1057	0	0	N/A	0	0
4081057000	9	46	0	155	0.0010071	11	Middle Mekong	46.1839	0	0	N/A	0	0
4081057080	8	34	0	112	0.0009998	9	Middle Mekong	86.1877	0	0	N/A	0	0
4081057090	8	34	0	112	0.000999	0	Middle Mekong	95	0	0	N/A	0	0
4081057700	1	18	0	65	0.0009538	10	Upper Mekong	83.0161	0.939385	0.250202	N/A	0.594793	59.4793
4081057840	3	35	0	98	0.001076	0	Upper Mekong	100	0.483009	0	N/A	0.241505	24.1505
4081058080	20	87	0	234	0.0007785	1	Middle Mekong	61	0	0	0	0	0
4081058150	8	34	0	113	0.0009974	13	Middle Mekong	63	0	0	N/A	0	0
4081058860	9	50	0	157	0.0009688	3	Middle Mekong	43	0	0	N/A	0	0
4081058870	9	49	0	156	0.0009751	10	Middle Mekong	71.0933	0	0	N/A	0	0
4081060120	5	29	0	101	0.0010268	9	Middle Mekong	55.9173	0	0	N/A	0	0
4081060180	5	29	0	100	0.0010179	4	Middle Mekong	76.514	0	0	N/A	0	0
4081060780	9	47	0	153	0.0009957	18	Middle Mekong	52.9887	0	0	N/A	0	0
4081060830	9	50	0	159	0.0009738	5	Middle Mekong	54.3776	0	0	N/A	0	0
4081061430	19	86	0	228	0.0007779	0	Middle Mekong	100	0	0	0	0	0
4081061500	8	37	0	115	0.0009934	2	Middle Mekong	50.5302	0.279769	0.277462	N/A	0.278615	27.8615
4081061610	6	30	0	100	0.0009982	2	Middle Mekong	52.0474	0	0	N/A	0	0
4081061700	6	30	0	97	0.0009945	0	Middle Mekong	100	0	0	N/A	0	0
4081062190	5	29	0	98	0.0010187	2	Middle Mekong	71.054	0	0	N/A	0	0
4081062200	5	30	0	102	0.0010236	8	Middle Mekong	30.7354	0	0	N/A	0	0
4081062590	19	86	0	230	0.0007692	0	Middle Mekong	100	0	0	0	0	0
4081062600	10	48	0	133	0.0009958	1	Middle Mekong	52.9521	0	0	N/A	0	0
4081063090	5	22	0	72	0.0010005	0	Middle Mekong	100	0.2388	0.124385	N/A	0.181593	18.1593
4081063100	5	21	0	72	0.0010025	0	Middle Mekong	100	0	0	N/A	0	0
4081064100	9	50	0	160	0.0009737	0	Middle Mekong	100	0	0	N/A	0	0
4081064180	9	50	0	159	0.000962	29	Middle Mekong	25.7836	0	0	N/A	0	0
4081064950	6	36	0	116	0.0010414	8	Middle Mekong	49.8776	0	0	N/A	0	0
4081064960	5	30	0	104	0.0010226	18	Middle Mekong	44.2804	0	0	N/A	0	0
4081065060	6	32	0	104	0.0010004	4	Middle Mekong	50	0	0	N/A	0	0
4081065130	5	23	0	78	0.0009938	0	Middle Mekong	100	0	0	N/A	0	0
4081065230	6	31	0	105	0.0009959	3	Middle Mekong	78.5976	0	0	N/A	0	0
4081065240	5	23	0	76	0.000996	0	Middle Mekong	100	0	0	N/A	0	0
4081065790	6	20	0	62	0.0009922	0	Middle Mekong	100	0	0	N/A	0	0
4081065800	6	19	0	62	0.0009963	0	Middle Mekong	100	0	0	N/A	0	0
4081066240	5	24	0	80	0.0009912	0	Middle Mekong	100	0	0	N/A	0	0
4081066320	5	22	0	82	0.001014	3	Middle Mekong	64.291	0.15295	0.0387966	N/A	0.0958731	9.58731
4081066410	7	32	0	109	0.0010333	11	Middle Mekong	13	0	0	N/A	0	0
4081066460	6	33	0	108	0.0009947	5	Middle Mekong	70.9939	0	0	N/A	0	0
4081066830	6	19	0	62	0.0009963	0	Middle Mekong	95.7111	0	0	N/A	0	0
4081066900	6	18	0	61	0.0009967	0	Middle Mekong	43	0	0	N/A	0	0
4081067890	8	42	0	134	0.0010039	0	Middle Mekong	98.9324	0	0	N/A	0	0
4081067900	15	67	0	211	0.0008219	0	Middle Mekong	100	0	0	N/A	0	0
4081068060	15	67	0	211	0.0008219	0	Middle Mekong	100	N/A	0	N/A	0	0
4081068230	11	51	0	160	0.0009694	1	Middle Mekong	67.3316	0.0847731	0	N/A	0.0423866	4.23866
4081068270	14	50	0	168	0.0009589	3	Middle Mekong	56.8759	0	0	N/A	0	0
4081068330	15	67	0	211	0.0008219	31	Middle Mekong	52	0	0	N/A	0	0
4081068920	7	20	0	65	0.0010112	21	Middle Mekong	80.2921	0	0	N/A	0	0
4081068960	7	20	0	65	0.0010112	0	Middle Mekong	100	0	0	N/A	0	0
4081069140	5	24	0	84	0.0009989	0	Middle Mekong	100	0.731764	0.68073	N/A	0.706247	70.6247
4081069190	5	23	0	76	0.0009979	6	Middle Mekong	55	0	0.0118209	N/A	0.00591045	0.591045
4081069340	7	20	0	65	0.0010112	0	Middle Mekong	100	0	0	N/A	0	0
4081069420	6	18	0	60	0.0010111	16	Middle Mekong	35.3156	0.112858	0.150981	N/A	0.13192	13.192
4081069880	9	55	0	177	0.0009214	1	Middle Mekong	50.7559	0.0125456	0	N/A	0.00627281	0.627281
4081069940	25	102	0	297	0.000549	0	Middle Mekong	31.6394	0.29661	0.268118	0	0.188243	18.8243
4081070290	26	102	0	307	0.000513	0	Middle Mekong	69.4634	0	0	0	0	0
4081070300	5	24	0	84	0.0009989	3	Middle Mekong	83.832	0.272511	0.566046	N/A	0.419278	41.9278
4081070360	9	54	0	170	0.0009463	3	Middle Mekong	69	0.0670693	0.0188789	N/A	0.0429741	4.29741
4081070370	18	47	0	153	0.0010494	0	Middle Mekong	74	0.76786	0.790277	0.828038	0.795391	79.5391
4081070400	19	86	0	231	0.0007686	0	Middle Mekong	75	0	0	0	0	0
4081070410	6	32	0	104	0.0009837	0	Middle Mekong	100	0.497809	0.340189	N/A	0.418999	41.8999
4081070470	10	57	0	191	0.000902	4	Middle Mekong	35	0.617835	0.474688	N/A	0.546262	54.6262
4081070550	26	100	0	283	0.0005678	0	Middle Mekong	11.4006	0.062629	0	0	0.0208763	2.08763
4081070820	12	52	0	162	0.0009137	0	Middle Mekong	50.4389	0.398469	0.168052	N/A	0.28326	28.326
4081070830	16	69	0	212	0.0007971	0	Middle Mekong	55.5508	0.0466576	0	0	0.0155525	1.55525
4081071310	27	103	0	293	0.0005533	0	Middle Mekong	70.5698	0	0	0	0	0
4081071320	17	62	0	177	0.000945	4	Middle Mekong	40.8694	0.438944	0.329614	0.515078	0.427879	42.7879
4081071670	26	102	0	303	0.0005122	0	Middle Mekong	30.3743	0	0	0	0	0
4081071680	20	74	0	217	0.0007671	8	Middle Mekong	40	0.30303	0	N/A	0.151515	15.1515
4081072100	15	69	0	209	0.0007976	0	Middle Mekong	100	0	0	0	0	0
4081072160	13	53	0	171	0.0008976	6	Middle Mekong	40.2744	0.720543	0.284762	N/A	0.502653	50.2653
4081072170	10	25	0	79	0.0011152	2	Middle Mekong	96	0.0141034	0	N/A	0.00705168	0.705168
4081072230	16	42	0	140	0.001096	4	Middle Mekong	13.4005	0.0111273	0.395399	N/A	0.203263	20.3263
4081072660	12	43	0	120	0.0009653	5	Middle Mekong	13.4005	0	0	N/A	0	0
4081072700	22	89	0	249	0.0006785	0	Middle Mekong	92.711	0.0571215	0	0	0.0190405	1.90405
4081072710	12	53	0	164	0.0009082	10	Middle Mekong	24.315	0.412924	0.354502	N/A	0.383713	38.3713
4081072800	14	68	0	211	0.0007905	0	Middle Mekong	26.6815	0.283025	0	0	0.0943415	9.43415
4081073750	14	68	0	212	0.0007913	0	Middle Mekong	100	0	0	0	0	0
4081073760	14	71	0	227	0.0007564	1	Middle Mekong	72	0.155347	0	0	0.0517823	5.17823
4081073820	12	53	0	169	0.0009037	10	Middle Mekong	61.4692	0.463691	0	N/A	0.231845	23.1845
4081073830	25	98	0	277	0.0005927	0	Middle Mekong	100	0	0	0	0	0
4081074480	13	60	0	178	0.0008516	16	Middle Mekong	19	0	0	N/A	0	0
4081074530	22	89	0	248	0.0006795	0	Middle Mekong	65	0	0	0	0	0
4081074540	14	58	0	167	0.0009111	4	Middle Mekong	68.5603	0.324102	0	N/A	0.162051	16.2051
4081074620	13	61	0	180	0.0008412	4	Middle Mekong	36.5435	0	0	N/A	0	0
4081075060	10	20	0	80	0.0011263	8	Middle Mekong	13	0.259333	0.0412075	N/A	0.15027	15.027
4081075260	13	34	0	128	0.0011684	1	Middle Mekong	92.2047	0.82901	0.85578	N/A	0.842395	84.2395
4081075530	22	89	0	249	0.0006816	0	Middle Mekong	51.1086	0	0	0	0	0
4081075570	14	57	0	164	0.0009154	0	Middle Mekong	94.1848	0	0	N/A	0	0
4081075640	25	98	0	277	0.0005927	0	Middle Mekong	100	0	0	0	0	0
4081075650	12	60	0	175	0.000852	4	Middle Mekong	84.5858	0	0	N/A	0	0
4081075960	25	96	0	279	0.0005743	0	Middle Mekong	13.8477	0	0	0	0	0
4081076030	12	51	0	152	0.0009057	10	Middle Mekong	13.7177	0	0	N/A	0	0
4081076150	13	58	0	173	0.0008565	0	Middle Mekong	82.1411	0	0	N/A	0	0
4081076170	13	61	0	177	0.000847	3	Middle Mekong	38.6546	0	0	N/A	0	0
4081076840	12	51	0	154	0.0009365	5	Middle Mekong	35.451	0	0	N/A	0	0
4081076950	21	89	0	252	0.0006763	0	Middle Mekong	100	0	N/A	0	0	0
4081076980	21	89	0	252	0.0006763	0	Middle Mekong	100	0	0	0	0	0
4081077010	13	61	0	173	0.0008871	4	Middle Mekong	45.5122	0	N/A	N/A	0	0
4081077430	25	94	0	272	0.0006157	0	Middle Mekong	18	0.0828574	0	0	0.0276191	2.76191
4081077480	12	53	0	148	0.0009228	16	Middle Mekong	4.87007	0.013127	0	N/A	0.00656348	0.656348
4081077580	21	89	0	252	0.0006763	0	Middle Mekong	100	0	0	0	0	0
4081077590	9	44	0	127	0.0009658	7	Middle Mekong	14.3094	0	0	N/A	0	0
4081077860	11	52	0	153	0.0008798	10	Middle Mekong	78.7334	0	0	N/A	0	0
4081077890	11	59	0	165	0.0008649	3	Middle Mekong	18.0323	0	0	N/A	0	0
4081077930	20	88	0	242	0.0007229	0	Middle Mekong	51.8913	0.0847228	0.0725099	0	0.0524109	5.24109
4081077940	7	49	0	148	0.0009427	7	Middle Mekong	36	0	0	N/A	0	0
4081077980	13	58	0	174	0.0008575	6	Middle Mekong	17.8201	0	0	N/A	0	0
4081078110	14	60	0	180	0.000847	1	Middle Mekong	27	0	0	N/A	0	0
4081078600	13	58	0	170	0.0008603	29	Middle Mekong	31.678	0	0	N/A	0	0
4081078690	13	61	0	176	0.0008607	15	Middle Mekong	57.6413	0	0	N/A	0	0
4081079240	6	45	0	139	0.000963	12	Middle Mekong	79.148	0	0	N/A	0	0
4081079250	15	61	0	182	0.0008386	9	Middle Mekong	69.1223	0	0	N/A	0	0
4081079310	6	42	0	122	0.000964	0	Middle Mekong	86.3547	0.00708343	0	N/A	0.00354172	0.354172
4081079370	13	48	0	139	0.0009206	17	Middle Mekong	7.10217	0	0	N/A	0	0
4081079380	10	30	0	108	0.0011651	1	Middle Mekong	85	0.996623	0.988409	N/A	0.992516	99.2516
4081079460	11	28	0	103	0.0011644	1	Middle Mekong	84.9034	0.939483	0.760925	N/A	0.850204	85.0204
4081079600	13	59	0	171	0.0008704	0	Middle Mekong	45	0	0	N/A	0	0
4081079610	13	59	0	172	0.0008693	7	Middle Mekong	55.1454	0	0	N/A	0	0
4081080120	25	105	0	287	0.0005666	0	Middle Mekong	44.9014	0.0312631	0	0	0.010421	1.0421
4081080170	21	97	0	256	0.0006663	2	Middle Mekong	28	0	0	0	0	0
4081080340	17	77	0	216	0.0007663	4	Middle Mekong	39	0	0	N/A	0	0
4081080370	11	51	0	154	0.0008739	3	Middle Mekong	47.2849	0	0	N/A	0	0
4081080620	13	58	0	171	0.0008579	8	Middle Mekong	20	0.00425114	0	N/A	0.00212557	0.212557
4081080630	13	58	0	170	0.0008653	11	Middle Mekong	42	0	0	N/A	0	0
4081081090	14	57	0	159	0.0009131	2	Middle Mekong	53.2204	0.411775	0.332776	N/A	0.372275	37.2275
4081081110	11	58	0	163	0.0008808	7	Middle Mekong	18.3433	0	0	N/A	0	0
4081081120	11	55	0	156	0.0008729	46	Middle Mekong	5	0	0	N/A	0	0
4081081130	26	106	0	296	0.000529	0	Middle Mekong	13.0778	0	0	0	0	0
4081081190	4	28	0	95	0.0009742	4	Middle Mekong	71	0	0	N/A	0	0
4081081220	6	45	0	139	0.000963	20	Middle Mekong	62.5686	0	0	N/A	0	0
4081081930	3	35	0	111	0.001004	36	Middle Mekong	50	0	0	N/A	0	0
4081081980	3	35	0	105	0.0009989	19	Middle Mekong	36.9139	0.271614	0.106603	N/A	0.189108	18.9108
4081082460	3	32	0	107	0.0010253	11	Middle Mekong	46.5734	0.17795	0.0904459	N/A	0.134198	13.4198
4081082470	3	34	0	109	0.0010028	0	Middle Mekong	97.4144	0.109247	0	N/A	0.0546234	5.46234
4081082580	9	39	0	115	0.0009619	16	Middle Mekong	31.0979	0	N/A	N/A	0	0
4081082590	10	53	0	154	0.000883	0	Middle Mekong	100	0	0	N/A	0	0
4081082710	9	39	0	115	0.0009642	0	Middle Mekong	100	0	0	N/A	0	0
4081082720	10	58	0	159	0.0008878	16	Middle Mekong	37.2173	0	N/A	N/A	0	0
4081082890	9	39	0	113	0.000964	7	Middle Mekong	37.6388	0	N/A	N/A	0	0
4081082900	9	39	0	115	0.0009642	32	Middle Mekong	87.8695	0	0	N/A	0	0
4081082910	10	52	0	149	0.0008872	25	Middle Mekong	98	0	0	N/A	0	0
4081082920	10	52	0	153	0.0008836	15	Middle Mekong	14.7425	0	0	N/A	0	0
4081082960	13	36	0	128	0.0010774	0	Middle Mekong	100	0.558209	0.236302	N/A	0.397255	39.7255
4081083010	13	36	0	129	0.0010735	3	Middle Mekong	69.1142	0.525997	0.429378	N/A	0.477687	47.7687
4081083250	9	39	0	113	0.000964	11	Middle Mekong	27	0.0557018	N/A	N/A	0.0557018	5.57018
4081083310	9	39	0	115	0.0009642	44	Middle Mekong	47.4905	0	0	N/A	0	0
4081083420	11	42	0	133	0.0009	5	Middle Mekong	37.5521	0	0	N/A	0	0
4081083540	11	44	0	136	0.0008888	0	Middle Mekong	80.6395	0	0	N/A	0	0
4081084010	17	59	0	181	0.0009577	1	Middle Mekong	58.4064	0.185292	0.0356023	N/A	0.110447	11.0447
4081084020	14	42	0	140	0.0010359	1	Middle Mekong	60	0	0	N/A	0	0
4081084200	11	44	0	132	0.0009064	28	Middle Mekong	10	0.00490657	0	N/A	0.00245328	0.245328
4081084380	11	42	0	126	0.0008865	9	Middle Mekong	50	0.013697	0	N/A	0.00684848	0.684848
4081084580	5	30	0	81	0.0008383	13	Middle Mekong	14.6556	0	0	N/A	0	0
4081084750	5	29	0	76	0.0008078	12	Middle Mekong	26.4481	0.336187	0	N/A	0.168093	16.8093
4081084810	11	43	0	131	0.0008914	0	Middle Mekong	97	0	0	N/A	0	0
4081084830	11	42	0	129	0.0008808	0	Middle Mekong	62.9606	0.0304881	0	N/A	0.015244	1.5244
4081084980	4	32	0	86	0.0008388	25	Mun	15	0	0	N/A	0	0
4081085080	4	32	0	84	0.0008208	18	Mun	29.401	0	N/A	N/A	0	0
4081085690	20	63	0	203	0.0009055	0	Middle Mekong	100	0	0	N/A	0	0
4081085700	14	41	0	140	0.0010305	0	Middle Mekong	100	0	0	N/A	0	0
4081086300	11	42	0	129	0.0008808	4	Middle Mekong	20.4107	0.606164	0.341282	N/A	0.473723	47.3723
4081086340	11	42	0	125	0.0008899	26	Middle Mekong	13.4289	0.372652	0	N/A	0.186326	18.6326
4081086360	15	72	0	200	0.0007856	0	Middle Mekong	71.3709	0	0	N/A	0	0
4081086430	15	73	0	200	0.0007804	12	Middle Mekong	7.72194	0.218974	0.00417605	N/A	0.111575	11.1575
4081087700	22	74	0	232	0.0008208	0	Middle Mekong	100	0	0	N/A	0	0
4081087750	11	44	0	150	0.0009806	7	Middle Mekong	18.8354	0.0176816	0.0097722	N/A	0.0137269	1.37269
4081088360	15	82	0	217	0.0007465	36	Middle Mekong	17	0	0	N/A	0	0
4081088430	14	69	0	196	0.0007904	35	Middle Mekong	36.5852	0.208157	0	N/A	0.104079	10.4079
4081089090	14	76	0	204	0.0007703	29	Middle Mekong	5.93932	0	0	N/A	0	0
4081089120	15	83	0	219	0.0007501	17	Middle Mekong	20.3315	0.133772	0	N/A	0.066886	6.6886
4081089420	32	109	0	309	0.0005106	0	Middle Mekong	24	0.11721	0.0306333	0	0.049281	4.9281
4081089430	27	93	0	274	0.0006281	1	Middle Mekong	22.5103	0	0	N/A	0	0
4081089590	22	92	0	245	0.000694	15	Middle Mekong	68.4291	0	0	N/A	0	0
4081089600	32	109	0	309	0.0005106	0	Middle Mekong	100	N/A	0	0	0	0
4081090080	32	109	0	309	0.0005106	0	Middle Mekong	87	0	0	0	0	0
4081090130	21	83	0	222	0.0007428	8	Middle Mekong	75.3413	0	0	N/A	0	0
4081090730	4	35	0	94	0.000882	22	Mun	6.86093	0.0809118	0	N/A	0.0404559	4.04559
4081090800	5	32	0	87	0.0008708	27	Mun	4.34026	0.0857454	0.0781695	N/A	0.0819575	8.19575
4081090900	5	41	0	118	0.0009134	8	Mun	18.0383	0.0322681	0	N/A	0.016134	1.6134
4081090970	5	46	0	133	0.0009199	13	Mun	4	0	0	N/A	0	0
4081091080	5	38	0	100	0.0008883	27	Mun	91.051	0	0	N/A	0	0
4081091160	5	37	0	101	0.0008923	47	Mun	13.122	0.161077	0.0299279	N/A	0.0955023	9.55023
4081091170	5	50	0	133	0.0009391	9	Mun	20.9402	0.0268688	0.402652	N/A	0.21476	21.476
4081091200	5	46	0	121	0.0009374	0	Mun	96.6967	0.343386	0.562026	N/A	0.452706	45.2706
4081091210	13	55	0	155	0.0009041	0	Middle Mekong	100	0	0	N/A	0	0
4081091220	13	55	0	151	0.0009172	3	Middle Mekong	28.2552	0.409536	0.0774607	N/A	0.243498	24.3498
4081091330	5	50	0	133	0.0009391	0	Mun	100	0.824679	0.820912	N/A	0.822795	82.2795
4081091340	13	55	0	156	0.000901	0	Middle Mekong	86	0	0	N/A	0	0
4081091350	13	61	0	174	0.0008741	0	Middle Mekong	100	0	0	N/A	0	0
4081091420	6	52	0	157	0.0009185	10	Mun	8.89375	0.0405455	0.118946	N/A	0.0797457	7.97457
4081091730	5	43	0	127	0.0009307	0	Mun	88.9962	0	0	N/A	0	0
4081091810	5	38	0	117	0.0008982	3	Mun	13.6692	0.0495534	0	N/A	0.0247767	2.47767
4081091940	5	60	0	166	0.0008768	11	Mun	33.5761	0	0	N/A	0	0
4081091950	5	41	0	125	0.0009101	14	Mun	22.6911	0	0	N/A	0	0
4081092620	4	23	0	89	0.0010842	8	Middle Mekong	22.6911	0.404732	0.171083	N/A	0.287907	28.7907
4081092670	3	22	0	79	0.0010478	9	Middle Mekong	28	0.132831	0.0472521	N/A	0.0900417	9.00417
4081093390	19	77	0	208	0.0007635	7	Middle Mekong	15.8103	0.409026	0.181126	0	0.196717	19.6717
4081093400	28	109	0	305	0.0005092	0	Middle Mekong	18.8353	0	0	0	0	0
4081093670	5	51	0	146	0.0009121	0	Mun	82.0442	0	0	N/A	0	0
4081093700	6	51	0	141	0.000905	0	Mun	75.5772	0	0	N/A	0	0
4081094590	27	109	0	304	0.0004961	0	Middle Mekong	100	0	0	0	0	0
4081094680	22	89	0	235	0.0007089	9	Middle Mekong	14.2316	0	0	N/A	0	0
4081095050	13	55	0	160	0.0008914	3	Middle Mekong	69.2876	0	0	N/A	0	0
4081095060	13	61	0	174	0.0008741	0	Middle Mekong	42.9393	0	0	N/A	0	0
4081095110	21	85	0	233	0.0007143	4	Middle Mekong	40.3969	0	0	N/A	0	0
4081095190	27	109	0	304	0.0004961	0	Middle Mekong	100	N/A	0	0	0	0
4081095870	4	31	0	87	0.0008679	28	Mun	22.4093	0.266765	0.066414	N/A	0.166589	16.6589
4081095950	4	32	0	90	0.0008945	11	Mun	12.3069	0.365159	0.215077	N/A	0.290118	29.0118
4081096260	5	61	0	171	0.0008796	10	Mun	5.87678	0	0	N/A	0	0
4081096270	5	40	0	121	0.0009246	44	Mun	8	0	0	N/A	0	0
4081096290	3	23	0	77	0.000964	0	Middle Mekong	100	0.817931	0.552624	N/A	0.685278	68.5278
4081096350	3	23	0	77	0.000964	4	Middle Mekong	50.53	0.529888	0.349648	N/A	0.439768	43.9768
4081096650	5	38	0	118	0.0009125	23	Mun	12.121	0.0251899	0	N/A	0.0125949	1.25949
4081096710	3	23	0	76	0.0009578	0	Middle Mekong	74.5412	0	0	N/A	0	0
4081096730	5	47	0	134	0.0008964	26	Mun	20.0426	0	0	N/A	0	0
4081096740	5	48	0	138	0.000904	20	Mun	28.5422	0	0	N/A	0	0
4081096750	5	61	0	176	0.0008509	0	Mun	100	0	0	N/A	0	0
4081096770	3	23	0	76	0.0009578	3	Middle Mekong	75	0.153476	0	N/A	0.0767382	7.67382
4081096820	27	109	0	304	0.0004961	0	Middle Mekong	84.0228	0.00295285	0	0	0.000984284	0.0984284
4081096880	5	30	0	106	0.0010578	0	Middle Mekong	79.7013	0.675772	0.590745	N/A	0.633259	63.3259
4081096890	3	28	0	88	0.0009838	3	Middle Mekong	100	1	1	N/A	1	100
4081096920	18	78	0	214	0.0007443	11	Middle Mekong	8.45439	0.0166084	0.0315714	N/A	0.0240899	2.40899
4081096930	3	28	0	88	0.0009838	0	Middle Mekong	100	N/A	1	N/A	1	100
4081096970	3	27	0	88	0.0009789	1	Middle Mekong	52.3885	0.339344	0.259061	N/A	0.299203	29.9203
4081097380	7	53	0	153	0.0009018	5	Mun	49.2251	0	0	N/A	0	0
4081097390	5	44	0	130	0.0008777	6	Mun	38.3794	0	0	N/A	0	0
4081097510	5	61	0	179	0.0008202	0	Mun	34.6424	0	0	0	0	0
4081097520	18	80	0	226	0.0007419	0	Middle Mekong	97.6302	0	0	N/A	0	0
4081097530	16	65	0	180	0.0008952	4	Middle Mekong	19.0608	0.254935	0.0994994	N/A	0.177217	17.7217
4081097540	11	45	0	130	0.0010137	1	Middle Mekong	88	0.364631	0.288464	N/A	0.326547	32.6547
4081097590	5	44	0	136	0.0008632	36	Mun	13.8575	0	0	N/A	0	0
4081097660	15	52	0	166	0.0009308	0	Middle Mekong	28.1893	0.280054	0.273666	0.733433	0.429051	42.9051
4081098010	29	108	0	310	0.0004927	0	Middle Mekong	100	0	0	0	0	0
4081098080	16	74	0	202	0.0008304	0	Middle Mekong	48.5103	0.401575	0.637924	0.681065	0.573521	57.3521
4081098350	5	63	0	183	0.0007939	0	Mun	31.7973	0	0	0	0	0
4081098410	6	53	0	150	0.0008961	19	Mun	36.3043	0	0	N/A	0	0
4081098460	5	44	0	137	0.0008609	105	Mun	9	0	0	N/A	0	0
4081098480	5	64	0	187	0.0007807	3	Mun	11	0	0	0	0	0
4081098740	5	44	0	136	0.0008632	42	Mun	12.9297	0	0	N/A	0	0
4081098770	5	63	0	183	0.0007939	0	Mun	24.206	0	0	0	0	0
4081098790	5	64	0	186	0.0007841	0	Mun	38.3784	0	0	0	0	0
4081098850	5	49	0	146	0.0008697	57	Mun	19.9698	0	0	N/A	0	0
4081098870	3	22	0	75	0.0009573	2	Middle Mekong	62.5253	0.367191	0.143739	N/A	0.255465	25.5465
4081098890	5	41	0	125	0.0008946	18	Mun	7.35091	0	0	N/A	0	0
4081098900	5	43	0	125	0.0009101	21	Mun	5	0	0	N/A	0	0
4081098910	3	23	0	82	0.0009833	0	Middle Mekong	93.9326	0.107249	0	N/A	0.0536247	5.36247
4081099630	5	39	0	117	0.0008936	43	Mun	9	0.0383475	0	N/A	0.0191737	1.91737
4081099680	5	40	0	122	0.0008934	5	Mun	22	0	0	N/A	0	0
4081100320	29	108	0	310	0.0004927	2	Middle Mekong	12.0359	0	N/A	0	0	0
4081100330	8	26	0	90	0.0011271	3	Floodplain	49.4693	0.440995	0.393884	N/A	0.417439	41.7439
4081100360	28	109	0	309	0.0004717	0	Middle Mekong	28.448	0.0643341	0.00872012	0	0.0243514	2.43514
4081100370	29	108	0	310	0.0004927	0	Middle Mekong	100	N/A	N/A	0	0	0
4081100430	24	93	0	249	0.0006601	19	Middle Mekong	34	0	0	N/A	0	0
4081100460	8	26	0	90	0.0011185	0	Floodplain	94.7764	0.392353	0.578203	N/A	0.485278	48.5278
4081100530	8	30	0	103	0.0011196	0	Floodplain	100	N/A	1	N/A	1	100
4081100640	8	26	0	89	0.0011007	0	Floodplain	100	0	0	N/A	0	0
4081100770	5	32	0	92	0.0009032	23	Mun	10.2682	0.343975	0	N/A	0.171987	17.1987
4081100780	5	32	0	92	0.0009032	10	Mun	24.978	0.773236	0.203391	N/A	0.488314	48.8314
4081100940	7	69	0	200	0.0007476	3	Mun	19	0	0	0	0	0
4081101050	6	58	0	166	0.0008414	31	Mun	35.8651	0	0	N/A	0	0
4081101150	27	109	0	305	0.0005363	0	Middle Mekong	100	0	0	0	0	0
4081101190	5	39	0	117	0.0008936	39	Mun	12.7849	0	0	N/A	0	0
4081101220	13	57	0	159	0.0009155	2	Middle Mekong	34	0.70973	0.739965	N/A	0.724847	72.4847
4081101320	5	40	0	122	0.0008934	7	Mun	7	0	0	N/A	0	0
4081101700	7	72	0	202	0.0007464	18	Mun	75.9414	0	0	0	0	0
4081101720	6	49	0	149	0.0008435	0	Mun	59.2657	0	0	N/A	0	0
4081102060	6	48	0	150	0.0008466	15	Mun	2	0.0149919	0	N/A	0.00749595	0.749595
4081102110	8	75	0	212	0.0007019	5	Mun	38.2309	0	0	0	0	0
4081102620	27	109	0	310	0.0004799	0	Middle Mekong	28.2032	0	0	0	0	0
4081102680	21	84	0	231	0.0007517	3	Middle Mekong	38.3763	0	0	N/A	0	0
4081103250	9	79	0	217	0.0006806	15	Mun	38.9978	0	0	0	0	0
4081103300	14	62	0	174	0.000933	2	Middle Mekong	62.7502	0.0245152	0	N/A	0.0122576	1.22576
4081103320	8	59	0	172	0.000809	33	Mun	35.7547	0	0	N/A	0	0
4081103360	14	60	0	174	0.000927	8	Middle Mekong	49.4198	0	0	N/A	0	0
4081103470	5	33	0	93	0.000906	7	Mun	12.7731	0.103184	0.00163706	N/A	0.0524106	5.24106
4081103510	5	32	0	91	0.0009023	8	Mun	14.1329	0.120855	0	N/A	0.0604276	6.04276
4081103740	5	32	0	94	0.0008975	23	Mun	8.41966	0.0316177	0.0937246	N/A	0.0626712	6.26712
4081103810	5	35	0	97	0.0008597	10	Mun	25.5408	0	0	N/A	0	0
4081103920	14	65	0	183	0.0008919	9	Middle Mekong	76.0966	0.0037644	0	N/A	0.0018822	0.18822
4081104060	14	63	0	181	0.0008964	7	Middle Mekong	28.0199	0	0	N/A	0	0
4081104140	14	66	0	186	0.0008753	0	Middle Mekong	100	0.0535357	0	N/A	0.0267678	2.67678
4081104310	14	64	0	182	0.0008836	0	Middle Mekong	100	0	0	N/A	0	0
4081105000	5	33	0	94	0.0009053	25	Mun	17.291	0.0905137	0	N/A	0.0452569	4.52569
4081105040	4	31	0	88	0.0008406	16	Mun	15.9602	0.0110374	0	N/A	0.0055187	0.55187
4081105420	6	40	0	123	0.0008804	3	Mun	48	0	0	N/A	0	0
4081105500	6	45	0	132	0.0008756	0	Mun	100	0	0	N/A	0	0
4081105670	6	39	0	120	0.0008801	20	Mun	64.3691	0	0	N/A	0	0
4081105720	6	45	0	132	0.0008756	6	Mun	36.5796	0	0	N/A	0	0
4081105750	8	30	0	103	0.0011196	2	Floodplain	73	0.142873	0.194956	N/A	0.168914	16.8914
4081105800	8	26	0	90	0.0011043	0	Floodplain	100	0	0	N/A	0	0
4081106100	6	40	0	123	0.0008804	0	Mun	100	0	0	N/A	0	0
4081106130	6	45	0	134	0.0008726	12	Mun	63.2067	0	0	N/A	0	0
4081106550	27	109	0	311	0.0004717	0	Middle Mekong	61.9796	0.578448	0.499569	0.594582	0.557533	55.7533
4081106600	23	93	0	249	0.0006502	7	Middle Mekong	95.5173	0.314162	0.132419	N/A	0.22329	22.329
4081107190	6	40	0	118	0.0009036	38	Mun	14.0677	0	0	N/A	0	0
4081107310	7	64	0	183	0.0007853	0	Mun	100	0	N/A	0	0	0
4081107370	5	36	0	114	0.0008836	27	Mun	2.66761	0	0	N/A	0	0
4081107430	5	54	0	159	0.0008645	0	Mun	100	0	0	0	0	0
4081107440	5	39	0	125	0.0008848	35	Mun	6	0	0	N/A	0	0
4081107460	6	46	0	139	0.0008648	10	Mun	50.9192	0	0	N/A	0	0
4081107500	5	56	0	158	0.0008656	20	Mun	33	0	0	0	0	0
4081107510	6	44	0	132	0.0008732	13	Mun	41.0694	0	N/A	N/A	0	0
4081107750	7	64	0	183	0.0007853	0	Mun	97.9188	0	0	0	0	0
4081107760	6	43	0	142	0.0008742	80	Mun	10.3814	0	N/A	N/A	0	0
4081107770	8	66	0	188	0.0007657	17	Mun	35.5189	0	0	0	0	0
4081107780	6	46	0	139	0.0008648	0	Mun	100	0	0	N/A	0	0
4081107960	5	55	0	150	0.0008949	12	Mun	53.8176	0	0	N/A	0	0
4081107980	14	67	0	190	0.000862	2	Middle Mekong	53	0.0128111	0	N/A	0.00640554	0.640554
4081108010	5	36	0	110	0.0009146	30	Mun	5.67273	0	0	N/A	0	0
4081108020	5	55	0	156	0.0008736	20	Mun	62.8939	0	0	N/A	0	0
4081108040	14	63	0	173	0.0009276	3	Middle Mekong	60.9258	0	0	N/A	0	0
4081108070	5	42	0	118	0.000915	21	Mun	4.40304	0	0	N/A	0	0
4081108080	5	56	0	158	0.0008656	10	Mun	51.1072	0	0	0	0	0
4081108090	5	38	0	119	0.0008846	19	Mun	16.3919	0	0	N/A	0	0
4081108100	8	70	0	197	0.0007136	6	Mun	21.437	0	0	0	0	0
4081108150	6	50	0	155	0.0008671	36	Mun	4	0	0	N/A	0	0
4081108500	28	111	0	322	0.0004236	0	Middle Mekong	100	0.577986	0.554892	0.896084	0.676321	67.6321
4081108550	6	60	0	169	0.0008261	0	Mun	96.7362	0	0	0	0	0
4081108580	24	107	0	309	0.0004273	8	Mun	58.3209	0.559625	0	0.118618	0.226081	22.6081
4081108620	7	36	0	103	0.0008914	35	Mun	6.03183	0	0	N/A	0	0
4081108640	16	77	0	211	0.0007689	10	Mun	6	0	0	N/A	0	0
4081108670	22	102	1	286	0.0005143	0	Mun	100	0	0	0	0	0
4081108680	18	87	0	234	0.0006911	5	Mun	24.6297	0	0	N/A	0	0
4081108740	7	63	0	174	0.0008079	19	Mun	20.0902	0	0	0	0	0
4081108750	7	63	0	181	0.0007821	22	Mun	75.8436	0	0	0	0	0
4081108760	21	103	1	286	0.0005089	2	Mun	51.1808	0	0	0	0	0
4081108770	18	85	0	245	0.0006034	4	Mun	98.0268	0	0	N/A	0	0
4081108780	23	104	0	299	0.0004569	0	Mun	85.47	0	0	0	0	0
4081108810	6	46	0	146	0.000886	27	Mun	12.1257	0	0	N/A	0	0
4081108860	6	35	0	104	0.000899	8	Mun	15.4847	0	0	N/A	0	0
4081108980	8	34	0	115	0.0011107	0	Floodplain	98.039	0	0	N/A	0	0
4081109040	8	32	0	106	0.0010963	8	Floodplain	38.6299	0	0	N/A	0	0
4081109120	2	19	0	71	0.0010362	1	Floodplain	53	0.00820919	0	N/A	0.00410459	0.410459
4081109130	3	20	0	63	0.0010119	4	Floodplain	60	0.315134	0.433878	N/A	0.374506	37.4506
4081109220	24	107	0	309	0.0004273	0	Mun	73.8803	0	0	0	0	0
4081109310	14	76	0	222	0.0007358	3	Mun	42.2005	0.326337	0.0831074	N/A	0.204722	20.4722
4081109540	8	34	0	120	0.0011126	0	Floodplain	100	0	0	N/A	0	0
4081109630	5	37	0	107	0.0008726	18	Mun	10.0648	0	0	N/A	0	0
4081109640	17	78	0	219	0.0007175	4	Mun	71.8975	0	0	N/A	0	0
4081109670	12	69	0	205	0.000732	12	Mun	2.94937	0	0	0	0	0
4081109680	22	104	1	295	0.0004742	0	Mun	100	0	0	0	0	0
4081109690	16	43	0	151	0.0010825	8	Floodplain	60	0	0	N/A	0	0
4081109790	5	53	0	145	0.0008968	55	Mun	23.021	N/A	0	N/A	0	0
4081109810	18	96	1	272	0.0005331	0	Mun	100	0	N/A	0	0	0
4081110180	5	35	0	106	0.0009124	44	Mun	2.56045	0	0	N/A	0	0
4081110190	5	52	0	137	0.0009183	73	Mun	21.2017	0	0	N/A	0	0
4081110320	11	83	1	236	0.0006388	5	Mun	5.06689	0	0	0	0	0
4081110330	10	58	0	181	0.0008424	22	Mun	14.6027	0	0	N/A	0	0
4081110370	18	96	1	272	0.0005331	0	Mun	100	0	0	0	0	0
4081110440	10	54	0	171	0.0008333	9	Mun	30	0	0	N/A	0	0
4081110540	8	74	0	213	0.0006844	2	Mun	29.0462	0	0	0	0	0
4081110630	6	39	0	126	0.0009173	20	Mun	54.7375	0	0	N/A	0	0
4081110770	18	96	1	272	0.0005331	92	Mun	41.0115	0	0	0	0	0
4081110780	11	64	0	193	0.0007966	11	Mun	42.3463	0	0	N/A	0	0
4081110860	29	111	1	325	0.0004527	0	Middle Mekong	65	0.014628	0	0.0412854	0.0186378	1.86378
4081110870	14	68	0	197	0.0008421	3	Middle Mekong	20.9342	0	0	N/A	0	0
4081110990	11	80	1	232	0.000661	3	Mun	14.8672	0	0	0	0	0
4081111040	9	59	0	174	0.0008355	11	Mun	31.5743	0	0	0	0	0
4081111160	6	39	0	126	0.0009173	22	Mun	11.4448	0	0	N/A	0	0
4081111220	6	35	0	120	0.000928	48	Mun	26.6803	0	0	N/A	0	0
4081111420	3	21	0	72	0.0010405	3	Floodplain	76	0.421902	0.239376	N/A	0.330639	33.0639
4081111580	2	21	0	67	0.0009834	0	Floodplain	92.2589	1	1	N/A	1	100
4081111760	2	21	0	74	0.0010422	0	Floodplain	50.1915	0.0177567	0.114214	N/A	0.0659854	6.59854
4081111770	2	20	0	66	0.0009775	0	Floodplain	79.9287	0	0	N/A	0	0
4081112130	6	37	0	115	0.0008836	26	Mun	24	0	N/A	N/A	0	0
4081112180	6	38	0	122	0.0008892	18	Mun	40.0659	0	0	N/A	0	0
4081112220	5	46	0	125	0.0009298	37	Mun	19.1643	0	0	N/A	0	0
4081112280	5	43	0	118	0.000951	20	Mun	16.0282	0	0	N/A	0	0
4081112290	6	35	0	119	0.0009054	17	Mun	39	0	0	N/A	0	0
4081112370	6	37	0	118	0.000892	4	Mun	17.0327	0.155454	0	N/A	0.0777268	7.77268
4081112420	6	33	0	102	0.000861	45	Mun	12.849	0	0	N/A	0	0
4081112430	6	33	0	109	0.0009089	33	Mun	40.8988	0	0	N/A	0	0
4081112530	6	38	0	115	0.0008795	49	Mun	8.47528	0	0	N/A	0	0
4081112590	6	38	0	120	0.0008806	15	Mun	91	0	0	N/A	0	0
4081112650	5	40	0	114	0.0009153	50	Mun	25.5016	0	0	N/A	0	0
4081112670	5	37	0	108	0.000895	23	Mun	16.3962	0	0	N/A	0	0
4081113100	5	36	0	108	0.0009092	33	Mun	57.2866	0	0	N/A	0	0
4081113200	5	33	0	100	0.0009137	9	Mun	25.7107	0	N/A	N/A	0	0
4081113210	6	33	0	99	0.0008822	6	Mun	7.08598	0.024196	0	N/A	0.012098	1.2098
4081113270	6	34	0	96	0.000863	34	Mun	18.6333	0	0	N/A	0	0
4081113460	5	32	0	101	0.0009119	19	Mun	20.0784	0	0	N/A	0	0
4081113540	5	36	0	106	0.0009135	0	Mun	100	0	0	N/A	0	0
4081113560	6	38	0	118	0.000887	64	Mun	24.344	0	0	N/A	0	0
4081113600	6	38	0	111	0.0008706	26	Mun	9.77799	0.047499	0	N/A	0.0237495	2.37495
4081113660	5	36	0	108	0.0009222	13	Mun	35.4232	0	0	N/A	0	0
4081113670	6	34	0	105	0.0008749	13	Mun	38	0	N/A	N/A	0	0
4081113700	5	33	0	100	0.000896	10	Mun	35.0141	0	0	N/A	0	0
4081113710	4	17	0	49	0.0009493	16	Floodplain	31	0.105194	0	N/A	0.0525971	5.25971
4081113740	6	34	0	105	0.0008804	6	Mun	52.4055	0	0	N/A	0	0
4081113750	4	17	0	47	0.0009092	4	Floodplain	38.4156	0	0	N/A	0	0
4081113850	6	32	0	102	0.0008799	25	Mun	19.1691	0	0	N/A	0	0
4081113860	6	32	0	102	0.0008695	52	Mun	13	0.21137	0	N/A	0.105685	10.5685
4081114250	10	50	0	154	0.0008873	0	Mun	67.8771	0	0	N/A	0	0
4081114260	10	54	0	171	0.0008333	0	Mun	100	0	0	N/A	0	0
4081114320	5	33	0	97	0.0009066	23	Mun	17.2267	0	0	N/A	0	0
4081114370	6	35	0	103	0.0009432	44	Mun	4.53607	0.272718	0.0105956	N/A	0.141657	14.1657
4081114550	7	43	0	124	0.0009291	23	Mun	9.78812	0.0533691	0	N/A	0.0266846	2.66846
4081114560	8	42	0	125	0.0009149	7	Mun	25.1215	0.0367643	0	N/A	0.0183822	1.83822
4081114570	10	46	0	152	0.0010835	0	Floodplain	67.5896	0	0	N/A	0	0
4081114680	12	47	0	148	0.0010926	0	Floodplain	100	0	0	N/A	0	0
4081114800	5	36	0	109	0.0009428	12	Mun	28.5344	0.280045	0	N/A	0.140022	14.0022
4081114810	5	35	0	104	0.0009191	12	Mun	25	0	0	N/A	0	0
4081114830	4	27	0	103	0.0011153	4	Floodplain	16.8397	0.156298	0.0639139	N/A	0.110106	11.0106
4081114920	3	24	0	81	0.0010359	1	Floodplain	72	0.417079	0.409446	N/A	0.413262	41.3262
4081115130	6	33	0	94	0.0008496	37	Mun	7.24294	0	0	N/A	0	0
4081115160	6	34	0	96	0.000863	0	Mun	100	0	0	N/A	0	0
4081115510	5	38	0	106	0.0009695	18	Mun	31.686	0	0	N/A	0	0
4081115550	6	33	0	102	0.0008645	0	Mun	81.6437	0	0	N/A	0	0
4081115560	6	34	0	105	0.0008804	20	Mun	80.213	N/A	0	N/A	0	0
4081115570	16	43	0	129	0.0010545	7	Floodplain	51	0	0	N/A	0	0
4081115580	6	31	0	101	0.0009489	16	Mun	13.3746	0.419663	0.17484	N/A	0.297251	29.7251
4081115630	13	39	0	118	0.0010279	0	Floodplain	83.9569	0	0	N/A	0	0
4081115710	6	34	0	94	0.0008536	19	Mun	21.3606	0.0148336	0	N/A	0.00741678	0.741678
4081115720	6	33	0	94	0.0008445	46	Mun	14.4889	0.0153612	N/A	N/A	0.0153612	1.53612
4081115830	15	42	0	121	0.0010465	0	Floodplain	100	0	0	N/A	0	0
4081115880	15	42	0	121	0.0010465	0	Floodplain	100	0	0	N/A	0	0
4081116100	6	31	0	95	0.0009063	19	Mun	35.071	0	N/A	N/A	0	0
4081116130	6	36	0	107	0.000889	19	Mun	28.5874	0.260216	0	N/A	0.130108	13.0108
4081116140	4	18	0	50	0.0009482	5	Floodplain	45.8271	0	0	N/A	0	0
4081116160	5	32	0	96	0.0009138	18	Mun	31.9277	0	0	N/A	0	0
4081116200	6	33	0	100	0.000869	11	Mun	50.1703	0.653856	0	N/A	0.326928	32.6928
4081116210	5	30	0	91	0.0008721	75	Mun	14.4065	0	0	N/A	0	0
4081116220	6	33	0	102	0.0008704	27	Mun	24.3164	0.232105	0	N/A	0.116053	11.6053
4081116240	4	17	0	47	0.0009097	63	Floodplain	40.381	0.0488488	0	N/A	0.0244244	2.44244
4081116260	6	32	0	98	0.0008391	51	Mun	18.1005	0.15321	0	N/A	0.0766051	7.66051
4081116280	6	34	0	99	0.0009349	20	Mun	17.6517	0.314321	0.0804581	N/A	0.19739	19.739
4081116350	6	38	0	113	0.000874	130	Mun	8.81656	0.125016	0	N/A	0.062508	6.2508
4081116410	6	38	0	110	0.0008713	24	Mun	31.7662	0.264893	0	N/A	0.132446	13.2446
4081116430	13	39	0	118	0.0010122	0	Floodplain	100	0.238991	0.225209	N/A	0.2321	23.21
4081116470	14	59	0	173	0.0010254	0	Floodplain	48.2887	0	0	0	0	0
4081116480	5	18	0	51	0.0009648	10	Floodplain	43.4753	0	0	N/A	0	0
4081116490	4	18	0	50	0.0009482	36	Floodplain	23.3869	0	0	N/A	0	0
4081116560	15	45	0	127	0.0010346	0	Floodplain	100	0.478451	0.843801	N/A	0.661126	66.1126
4081116570	7	34	0	99	0.0009784	2	Floodplain	39.2603	0	0	N/A	0	0
4081116850	5	18	0	51	0.0009648	0	Floodplain	100	0	0	N/A	0	0
4081116910	5	17	0	50	0.0009688	12	Floodplain	19.531	0	0	N/A	0	0
4081117130	7	33	0	96	0.0008873	41	Mun	14.436	0.140412	0	N/A	0.0702059	7.02059
4081117140	7	34	0	95	0.0008826	89	Mun	24.1377	0.0100121	0	N/A	0.00500603	0.500603
4081117650	29	112	1	322	0.0004961	0	Middle Mekong	24.1377	0.441409	0.590039	0	0.343816	34.3816
4081117700	15	74	0	215	0.0007911	2	Middle Mekong	26.2788	0	0	N/A	0	0
4081117840	5	31	0	95	0.0009001	0	Mun	44	0	0	N/A	0	0
4081117850	13	54	0	155	0.0009458	0	Floodplain	94.8527	0.616574	0.608273	N/A	0.612423	61.2423
4081117860	16	56	0	150	0.0009968	0	Floodplain	100	1	1	N/A	1	100
4081117920	6	31	0	96	0.0009132	0	Mun	100	0	0	N/A	0	0
4081118010	6	31	0	96	0.0009132	0	Mun	64.7249	0.113518	0	N/A	0.0567589	5.67589
4081118020	5	30	0	93	0.000901	12	Mun	50.676	0	N/A	N/A	0	0
4081118040	7	37	0	105	0.0008949	9	Mun	68.6457	0.634619	0	N/A	0.31731	31.731
4081118100	7	37	0	108	0.0008965	12	Mun	35.4759	0.585822	0.352746	N/A	0.469284	46.9284
4081118770	21	70	0	196	0.0009143	0	Floodplain	100	1	1	N/A	1	100
4081118830	15	69	0	197	0.0009358	0	Floodplain	100	0.813296	0.995066	0.663808	0.824057	82.4057
4081119260	5	20	0	54	0.0009838	3	Floodplain	26.9336	0.0103761	0	N/A	0.00518803	0.518803
4081119270	4	20	0	48	0.0009426	6	Floodplain	28	0	0	N/A	0	0
4081119640	4	16	0	41	0.0009069	7	Floodplain	21	0.0842902	0	N/A	0.0421451	4.21451
4081119710	4	17	0	43	0.0009191	12	Floodplain	20	0.0346703	0	N/A	0.0173352	1.73352
4081119870	6	29	0	87	0.000886	0	Mun	100	1	N/A	N/A	1	100
4081119880	6	29	0	87	0.0008791	0	Mun	100	0.958823	1	N/A	0.979411	97.9411
4081119900	20	79	0	223	0.0008426	5	Floodplain	100	0.99909	0.760112	0.99908	0.919427	91.9427
4081120050	15	55	0	146	0.0009494	3	Floodplain	79	0.999168	0.99993	N/A	0.999549	99.9549
4081121020	22	82	0	236	0.0007991	0	Floodplain	100	0.98583	0.946024	0.832495	0.921449	92.1449
4081121030	16	66	0	168	0.0009227	0	Floodplain	100	0.935837	0.961549	N/A	0.948693	94.8693
4081121080	5	32	0	92	0.000929	0	Tonle Sap	87	0.389112	0.243159	N/A	0.316135	31.6135
4081121140	5	32	0	88	0.0009048	0	Tonle Sap	100	0.473464	0.18757	N/A	0.330517	33.0517
4081121470	19	82	0	224	0.0007596	0	Middle Mekong	100	0	0	N/A	0	0
4081121610	19	82	0	226	0.0007498	0	Middle Mekong	100	0.1408	0.788197	N/A	0.464498	46.4498
4081122050	19	81	0	222	0.0007626	0	Middle Mekong	100	0.584988	0.316201	N/A	0.450594	45.0594
4081122060	19	81	0	227	0.0007521	0	Middle Mekong	100	1	1	N/A	1	100
4081122070	19	81	0	223	0.0007608	0	Middle Mekong	100	0	0	N/A	0	0
4081122170	20	86	0	242	0.0007056	0	Middle Mekong	100	0.700889	0.128411	N/A	0.41465	41.465
4081122250	6	32	0	87	0.0008991	7	Tonle Sap	52.3724	0.529758	0.180955	N/A	0.355356	35.5356
4081122260	6	32	0	87	0.0008991	0	Tonle Sap	100	0.382082	0	N/A	0.191041	19.1041
4081122300	19	81	0	227	0.0007542	0	Middle Mekong	100	0	0	N/A	0	0
4081122370	22	94	1	259	0.0006724	0	Middle Mekong	100	N/A	0.0865126	N/A	0.0865126	8.65126
4081122420	20	72	0	176	0.0009453	0	Floodplain	100	0.991711	0.782586	N/A	0.887148	88.7148
4081122510	6	32	0	87	0.0008991	0	Tonle Sap	100	0.00323368	0	N/A	0.00161684	0.161684
4081122520	20	76	0	187	0.0009071	0	Floodplain	100	0	0	0	0	0
4081122560	6	32	0	86	0.0008901	0	Tonle Sap	100	0	0	N/A	0	0
4081122630	7	36	0	101	0.0010513	3	Floodplain	38.759	0.995464	0.957945	N/A	0.976704	97.6704
4081122690	20	76	0	187	0.0009071	1	Floodplain	73.0327	0.0473256	0.0204417	0.122641	0.0634693	6.34693
4081122780	22	90	0	253	0.0007444	0	Floodplain	100	0.58232	0.424117	0.380365	0.462267	46.2267
4081122800	20	76	0	187	0.0009071	0	Floodplain	100	0	0	0	0	0
4081122840	15	58	0	141	0.0009597	1	Floodplain	99	0.907637	0.899203	0	0.60228	60.228
4081122850	19	70	0	169	0.0009474	2	Floodplain	76	0.0300333	0	0	0.0100111	1.00111
4081123420	30	115	1	334	0.0004726	0	Middle Mekong	79.7355	0.162652	0	0	0.0542174	5.42174
4081123450	18	81	0	230	0.000749	0	Floodplain	100	0.818978	0.669455	N/A	0.744216	74.4216
4081123460	24	95	0	281	0.0006316	0	Floodplain	100	0.798287	0	0.240435	0.346241	34.6241
4081123470	18	69	0	168	0.0009529	0	Floodplain	100	0.933009	0.833307	N/A	0.883158	88.3158
4081123570	22	94	1	259	0.0006724	0	Middle Mekong	100	0.452581	0	N/A	0.226291	22.6291
4081123600	20	80	0	191	0.0008898	0	Floodplain	100	0.575776	0.156445	0.0398371	0.257353	25.7353
4081123690	6	33	0	89	0.0009146	0	Tonle Sap	63.8867	0	0	N/A	0	0
4081123700	6	33	0	89	0.0009146	3	Tonle Sap	82.2238	0	0	N/A	0	0
4081124250	6	25	0	73	0.0010862	5	Floodplain	11	0.0444069	0	0	0.0148023	1.48023
4081124290	4	23	0	57	0.000955	4	Floodplain	38.7045	0.298765	0.260548	N/A	0.279657	27.9657
4081124350	6	33	0	87	0.0008986	0	Tonle Sap	100	0	0	N/A	0	0
4081124400	5	35	0	91	0.0009086	5	Tonle Sap	80	0.0179496	0	N/A	0.0089748	0.89748
4081124470	5	35	0	91	0.0009086	0	Tonle Sap	100	N/A	0	N/A	0	0
4081124550	5	34	0	95	0.0009351	4	Tonle Sap	31.6897	0.131537	0.345706	N/A	0.238622	23.8622
4081124730	6	32	0	92	0.0009196	1	Tonle Sap	94.1093	0.699793	0.864386	N/A	0.782089	78.2089
4081124760	5	31	0	97	0.0009287	1	Tonle Sap	79.0381	0.514087	0.550128	N/A	0.532107	53.2107
4081125300	7	37	0	105	0.0009436	0	Tonle Sap	98	0.738675	0.667595	N/A	0.703135	70.3135
4081125370	6	33	0	100	0.0009433	0	Tonle Sap	100	0.965203	1	1	0.988401	98.8401
4081126020	19	84	0	228	0.0007686	1	Middle Mekong	67.7295	0.751116	0.869621	N/A	0.810369	81.0369
4081126030	31	117	1	345	0.0004708	0	Middle Mekong	97.1589	0.300584	0.138192	0.574772	0.337849	33.7849
4081126710	8	46	0	133	0.0009637	0	Tonle Sap	96.0039	0	0	N/A	0	0
4081126770	8	45	0	127	0.0009556	0	Tonle Sap	100	0	0	N/A	0	0
4081126930	22	88	0	215	0.0008224	0	Floodplain	47.5733	0.47732	0.241978	0.225602	0.314967	31.4967
4081127010	19	73	0	179	0.0009212	3	Floodplain	38.2633	0.165666	0.571859	0	0.245842	24.5842
4081127510	5	31	0	96	0.0009925	18	Tonle Sap	11.5745	0	0	N/A	0	0
4081127640	5	31	1	96	0.0009997	0	Tonle Sap	86.9369	0	0	N/A	0	0
4081127770	6	35	0	103	0.0009931	10	Tonle Sap	12.1982	0.133845	0.0558537	N/A	0.0948491	9.48491
4081127840	6	37	1	114	0.0010234	0	Tonle Sap	100	0	0	N/A	0	0
4081127920	5	32	0	98	0.0009957	14	Tonle Sap	18.8911	0	0	N/A	0	0
4081127950	6	37	1	114	0.0010234	12	Tonle Sap	67.0499	0	0	N/A	0	0
4081127980	7	40	1	118	0.0009953	0	Tonle Sap	97.5698	0	0	N/A	0	0
4081128010	6	36	0	111	0.0009584	2	Tonle Sap	93	0.287588	0.330573	0.255869	0.291343	29.1343
4081128020	6	36	0	110	0.000948	0	Tonle Sap	76.2645	0.607766	0.0957185	N/A	0.351742	35.1742
4081128040	7	42	1	126	0.0009995	4	Tonle Sap	38.4484	0	0	N/A	0	0
4081128070	7	42	1	126	0.0009995	0	Tonle Sap	100	N/A	0	0	0	0
4081128080	7	40	1	112	0.0009704	8	Tonle Sap	46.3566	0.395018	0.213181	N/A	0.3041	30.41
4081128090	28	101	1	309	0.0005806	0	Floodplain	100	0.8658	0.85887	0.808519	0.844396	84.4396
4081128120	28	105	1	310	0.000583	4	Floodplain	87	0.120257	N/A	0.355936	0.238097	23.8097
4081128130	23	88	0	223	0.0008117	0	Floodplain	90.1938	0.589463	0	0.381309	0.32359	32.359
4081128180	22	92	0	238	0.0007874	0	Floodplain	78	0.403304	0.820256	0.475355	0.566305	56.6305
4081128230	36	119	3	385	0.0004035	0	Middle Mekong	100	0.583841	0.47732	1	0.687053	68.7053
4081128330	40	120	4	413	0.0003886	0	Floodplain	100	0	N/A	0.113676	0.0568381	5.68381
4081128580	5	31	1	102	0.0010155	4	Tonle Sap	79.4174	0	0	N/A	0	0
4081128590	5	32	1	100	0.0010155	1	Tonle Sap	84.5488	0.0248951	0	N/A	0.0124475	1.24475
4081128660	24	98	1	284	0.0006441	2	Floodplain	75	0.313015	0.0454795	1	0.452832	45.2832
4081128670	40	120	4	413	0.0003886	0	Floodplain	100	0.0538554	0.0178581	0.983876	0.351863	35.1863
4081128880	8	55	0	155	0.0009079	0	Tonle Sap	100	0.368048	0.55251	N/A	0.460279	46.0279
4081128890	8	60	0	166	0.0009079	0	Tonle Sap	100	0.0831918	0.0801268	N/A	0.0816593	8.16593
4081129210	8	43	1	134	0.000998	6	Tonle Sap	73.8565	0	0	0	0	0
4081129220	7	41	1	112	0.0009609	10	Tonle Sap	36	0.440646	0.211329	0	0.217325	21.7325
4081129270	21	91	0	225	0.0008225	8	Floodplain	37.6827	0.442603	0.335619	0.662608	0.480277	48.0277
4081129350	18	73	0	180	0.0009226	0	Floodplain	100	1	1	N/A	1	100
4081129400	10	57	0	162	0.000888	4	Tonle Sap	96.6731	0.687737	0.114943	0.458146	0.420275	42.0275
4081129440	10	57	0	161	0.0008968	0	Tonle Sap	100	0.12946	0	N/A	0.0647301	6.47301
4081129890	6	40	1	122	0.0009638	5	Tonle Sap	23.6371	0.136775	0.0748768	N/A	0.105826	10.5826
4081129930	8	50	1	148	0.0009605	2	Tonle Sap	88.9663	0.0304926	0.222708	N/A	0.1266	12.66
4081130180	9	55	1	158	0.0009666	0	Tonle Sap	100	0.0124955	0	0.168689	0.0603947	6.03947
4081130230	8	44	1	115	0.000992	0	Tonle Sap	97.0081	0	0.0874471	1	0.362482	36.2482
4081130370	6	39	0	87	0.0010579	3	Floodplain	35.8971	0.36375	0.539329	N/A	0.45154	45.154
4081130420	8	54	0	128	0.0010253	0	Floodplain	100	0.999999	N/A	0.985185	0.992592	99.2592
4081130450	8	54	0	124	0.0010201	11	Floodplain	70.304	0.983316	0.77029	0.454758	0.736122	73.6122
4081130460	8	54	0	128	0.0010253	4	Floodplain	89.9554	0.986608	0.971901	0.691097	0.883202	88.3202
4081130470	3	28	0	64	0.0010261	3	Floodplain	37.3285	0.157769	0.212315	N/A	0.185042	18.5042
4081130540	6	38	0	96	0.0010026	0	Floodplain	99.2502	0.848675	0.793346	N/A	0.82101	82.101
4081130600	7	43	0	101	0.001034	0	Floodplain	100	1	1	N/A	1	100
4081130610	4	33	0	69	0.001014	0	Floodplain	53.679	0	0	N/A	0	0
4081130690	40	120	3	401	0.0004253	0	Floodplain	100	0.0359085	1	0.694024	0.576644	57.6644
4081130720	21	89	0	248	0.0007111	5	Floodplain	48	0.968074	0.918755	N/A	0.943415	94.3415
4081130770	2	23	0	52	0.0009194	2	Floodplain	90	0	0	N/A	0	0
4081130800	5	42	0	90	0.0010651	3	Floodplain	90	0.964452	0.972213	0.93947	0.958712	95.8712
4081130810	2	23	0	53	0.0009303	0	Floodplain	60.4813	0	0	N/A	0	0
4081130840	8	54	0	128	0.0010253	0	Floodplain	100	1	1	1	1	100
4081130860	11	58	1	170	0.000911	10	Tonle Sap	61.1145	0.208975	1	N/A	0.604487	60.4487
4081130890	22	105	4	303	0.0006441	0	Tonle Sap	100	1	1	1	1	100
4081130930	5	33	1	100	0.0010198	0	Tonle Sap	100	0	0	N/A	0	0
4081130940	5	34	1	109	0.0010318	3	Tonle Sap	61.1692	0	0	N/A	0	0
4081130960	40	120	3	401	0.0004253	0	Floodplain	100	N/A	0	0	0	0
4081131090	21	90	0	249	0.0007058	0	Floodplain	100	1	0.892911	N/A	0.946456	94.6456
4081131160	13	66	1	190	0.000908	0	Tonle Sap	100	0.427136	1	1	0.809045	80.9045
4081131190	4	39	0	94	0.0010368	1	Floodplain	90.0955	0.706056	0.942099	1	0.882718	88.2718
4081131200	8	54	0	128	0.0010253	0	Floodplain	100	1	1	1	1	100
4081131210	4	35	0	79	0.0010352	0	Floodplain	83	0.732277	0.949241	N/A	0.840759	84.0759
4081131250	14	80	3	217	0.0008959	2	Tonle Sap	26.3557	0.400659	0.328589	N/A	0.364624	36.4624
4081131290	5	46	0	109	0.0010614	0	Floodplain	100	0.996523	0.99426	0.9829	0.991227	99.1227
4081131420	22	105	4	303	0.0006441	0	Tonle Sap	100	1	1	1	1	100
4081131430	21	104	3	292	0.0007244	0	Tonle Sap	80	0.170266	0.39243	N/A	0.281348	28.1348
4081131460	10	58	0	167	0.0008871	0	Tonle Sap	100	0.509049	0	0.7515	0.420183	42.0183
4081131470	10	58	0	163	0.0008949	0	Tonle Sap	100	0.823831	0.406725	N/A	0.615278	61.5278
4081131500	2	25	0	55	0.0009374	0	Floodplain	100	0	0	N/A	0	0
4081131530	2	25	0	55	0.0009374	0	Floodplain	67.6905	0	0	N/A	0	0
4081131590	17	71	0	200	0.0008676	0	Floodplain	100	0	0.0809875	N/A	0.0404938	4.04938
4081131600	2	25	0	55	0.0009374	0	Floodplain	100	N/A	0	N/A	0	0
4081131640	22	105	4	303	0.0006441	0	Tonle Sap	100	N/A	1	1	1	100
4081131650	12	70	0	194	0.0008901	3	Tonle Sap	44	0.172862	0.463264	N/A	0.318063	31.8063
4081131660	17	70	0	199	0.0008763	0	Floodplain	100	0.758216	0.930289	N/A	0.844253	84.4253
4081131670	3	29	0	64	0.0010126	7	Floodplain	37.8616	0.0468234	0	N/A	0.0234117	2.34117
4081132340	5	33	1	105	0.0010372	15	Tonle Sap	70.6647	0	0	N/A	0	0
4081132360	5	32	1	103	0.0010326	3	Tonle Sap	65	0.499748	0	N/A	0.249874	24.9874
4081132450	5	32	1	100	0.0010222	5	Tonle Sap	92	0	0	N/A	0	0
4081132510	5	34	1	111	0.0010664	0	Tonle Sap	100	N/A	0	N/A	0	0
4081132560	18	77	0	214	0.0008337	0	Floodplain	100	0.295945	0.890092	N/A	0.593019	59.3019
4081132570	17	76	0	214	0.0008329	0	Floodplain	51.2724	0.717354	0.859334	N/A	0.788344	78.8344
4081132670	5	34	1	111	0.0010664	10	Tonle Sap	27.6136	0.172869	0	N/A	0.0864347	8.64347
4081132710	5	32	1	107	0.0010542	25	Tonle Sap	12.9338	0.162442	0.0145359	N/A	0.088489	8.8489
4081132800	23	106	4	313	0.0006362	0	Tonle Sap	92.0454	0.236244	0.685587	1	0.64061	64.061
4081132850	12	67	1	193	0.0008867	0	Tonle Sap	100	0.482848	0.486882	N/A	0.484865	48.4865
4081132910	17	76	0	214	0.0008329	0	Floodplain	100	1	0.960467	N/A	0.980234	98.0234
4081132920	16	67	0	193	0.0008834	1	Floodplain	63.3762	0.547652	0.51347	N/A	0.530561	53.0561
4081133050	3	38	0	81	0.0010722	5	Floodplain	24	0.44575	0.466321	0.923877	0.611983	61.1983
4081133080	13	67	1	194	0.0008845	4	Tonle Sap	21.9863	0.0213578	0.0728208	N/A	0.0470893	4.70893
4081133090	27	111	5	317	0.0006141	0	Tonle Sap	100	N/A	1	1	1	100
4081133100	3	32	0	75	0.0010073	0	Floodplain	98	0.680945	0.572089	N/A	0.626517	62.6517
4081133590	8	55	0	155	0.0009111	10	Tonle Sap	41	0.590753	0.112291	N/A	0.351522	35.1522
4081133660	8	60	0	167	0.0009189	2	Tonle Sap	48.6748	0.652918	0.460594	N/A	0.556756	55.6756
4081133850	8	46	1	136	0.0009595	0	Tonle Sap	60.8819	0	0	N/A	0	0
4081133900	8	46	1	136	0.0009595	0	Tonle Sap	100	0	0	N/A	0	0
4081133910	10	59	0	162	0.0008975	0	Tonle Sap	100	0.987119	0.570039	0	0.519053	51.9053
4081133920	10	59	0	168	0.0008768	0	Tonle Sap	79.4099	0.664159	0.460116	0.0835892	0.402621	40.2621
4081134350	8	46	1	136	0.0009595	0	Tonle Sap	59.763	0.0103883	0	N/A	0.00519416	0.519416
4081134380	20	86	0	242	0.000732	0	Floodplain	100	0.617295	0.774983	N/A	0.696139	69.6139
4081134410	8	46	1	137	0.0009711	3	Tonle Sap	45.7899	0.0969549	0.00618108	N/A	0.051568	5.1568
4081134420	20	86	0	239	0.000744	0	Floodplain	50.9072	0.146942	0.0898153	N/A	0.118379	11.8379
4081134510	8	57	0	166	0.0009109	0	Tonle Sap	89.1263	0.0656264	0.200776	N/A	0.133201	13.3201
4081134580	8	56	0	160	0.00092	1	Tonle Sap	57.414	0.357889	0.174835	N/A	0.266362	26.6362
4081134590	8	61	0	175	0.0009022	0	Tonle Sap	100	N/A	1	N/A	1	100
4081134660	8	61	0	175	0.0009022	0	Tonle Sap	100	0.62334	0.596538	N/A	0.609939	60.9939
4081134780	10	59	0	168	0.0008768	0	Tonle Sap	100	0.0215546	0	0	0.00718488	0.718488
4081134880	10	58	0	162	0.0008989	0	Tonle Sap	100	0.00462214	0	N/A	0.00231107	0.231107
4081134930	10	56	0	152	0.0009093	0	Tonle Sap	100	0.357985	N/A	N/A	0.357985	35.7985
4081134940	10	56	0	157	0.0009044	0	Tonle Sap	100	0.943572	0.883572	N/A	0.913572	91.3572
4081135220	3	32	0	66	0.0010231	20	Floodplain	23.7234	0	0.00327515	N/A	0.00163757	0.163757
4081135310	3	37	0	78	0.0010664	15	Floodplain	4.89525	0.125848	0.153828	0.0533051	0.110994	11.0994
4081135720	31	119	3	341	0.0005223	0	Floodplain	95.7982	0.543381	0.947997	0.523991	0.67179	67.179
4081135750	22	95	1	262	0.0006935	0	Floodplain	100	0.904562	0.573306	N/A	0.738934	73.8934
4081135810	27	111	5	317	0.0006141	0	Tonle Sap	72.8668	0.46707	0.303002	1	0.590024	59.0024
4081135850	12	74	0	216	0.0008217	0	Tonle Sap	100	1	1	N/A	1	100
4081135860	29	117	3	340	0.0005247	0	Floodplain	100	N/A	0	0	0	0
4081135870	22	94	1	262	0.0006963	0	Floodplain	100	0	0	N/A	0	0
4081136200	26	111	4	316	0.0006111	0	Tonle Sap	100	1	1	1	1	100
4081136270	18	87	3	254	0.0007999	18	Tonle Sap	35.1411	0.215272	0.395137	1	0.536803	53.6803
4081136630	12	47	0	154	0.0009919	0	Floodplain	100	1	1	N/A	1	100
4081136670	13	47	0	157	0.0010109	2	Floodplain	63.6182	0.67359	0.903071	N/A	0.78833	78.833
4081136720	0	20	0	46	0.0009127	0	Floodplain	12.3243	0.0159764	0	N/A	0.00798819	0.798819
4081136800	0	18	0	44	0.0009019	8	Floodplain	26.0002	0.214359	0.262098	N/A	0.238229	23.8229
4081137150	12	47	0	158	0.0009809	0	Floodplain	100	0.953584	0.762869	N/A	0.858227	85.8227
4081137210	13	49	0	161	0.0009798	0	Floodplain	100	0.384708	0.370245	N/A	0.377476	37.7476
4081137270	13	80	3	225	0.0008811	17	Tonle Sap	21.1304	0	0	N/A	0	0
4081137280	7	55	1	155	0.0009509	3	Tonle Sap	95.0715	0	0	N/A	0	0
4081137540	0	20	0	47	0.0009187	3	Floodplain	44.0705	0	0	N/A	0	0
4081137630	1	19	0	46	0.000936	7	Floodplain	29.9068	0.229377	0.0122745	N/A	0.120826	12.0826
4081137690	9	53	0	147	0.0009104	4	Tonle Sap	47.681	0.0706625	0	N/A	0.0353312	3.53312
4081137700	13	48	0	160	0.0009863	0	Floodplain	100	1	1	N/A	1	100
4081137720	10	58	0	163	0.000911	4	Tonle Sap	45.1527	0	0	N/A	0	0
4081137730	12	46	0	152	0.0009955	5	Floodplain	98.6128	0.999855	0.977081	N/A	0.988468	98.8468
4081137800	8	46	1	138	0.0009767	0	Tonle Sap	100	0.825816	0.746773	N/A	0.786295	78.6295
4081137910	1	20	0	47	0.0009231	15	Floodplain	16.4357	0	0.0161237	N/A	0.00806183	0.806183
4081137950	8	46	1	138	0.0009767	0	Tonle Sap	100	N/A	0.395494	N/A	0.395494	39.5494
4081137980	1	22	0	50	0.0009507	0	Floodplain	73.7574	0.33835	0.201586	N/A	0.269968	26.9968
4081138160	30	115	5	343	0.0005658	0	Tonle Sap	88.3925	0.455164	0.584008	0.970577	0.669917	66.9917
4081138170	13	74	0	216	0.0008152	1	Tonle Sap	39.7134	0.21469	0.101834	N/A	0.158262	15.8262
4081138290	8	46	1	138	0.0009767	0	Tonle Sap	100	0.934962	0.949303	N/A	0.942133	94.2133
4081138300	8	46	1	139	0.0009779	0	Tonle Sap	100	0.673702	0.163354	N/A	0.418528	41.8528
4081138310	10	57	0	160	0.0008953	0	Tonle Sap	100	0.215176	0.0216832	N/A	0.11843	11.843
4081138370	10	57	0	158	0.0009044	0	Tonle Sap	90.2132	0	0	N/A	0	0
4081138440	29	117	3	340	0.0005247	0	Floodplain	84	0.279902	0.045695	0	0.108532	10.8532
4081138450	14	57	0	187	0.0009342	3	Floodplain	49	0	0	N/A	0	0
4081138490	12	60	0	174	0.0009044	9	Tonle Sap	51.4339	0	0	N/A	0	0
4081138540	11	66	0	171	0.000908	8	Tonle Sap	30.2035	0.116721	0.0743411	N/A	0.0955308	9.55308
4081138550	1	24	0	59	0.0010066	0	Floodplain	43.8255	0.1413	0.128691	N/A	0.134995	13.4995
4081138600	1	23	0	51	0.0009414	5	Floodplain	32.641	0.343903	0.0787255	N/A	0.211314	21.1314
4081138630	25	113	4	325	0.0005933	0	Tonle Sap	98	0	0	0	0	0
4081138690	10	70	1	201	0.0008807	8	Tonle Sap	19.0145	0.323492	0	N/A	0.161746	16.1746
4081138700	13	48	0	162	0.0009819	3	Floodplain	87	0	0.0273455	N/A	0.0136728	1.36728
4081138730	12	48	0	159	0.0009712	0	Floodplain	100	0	0	N/A	0	0
4081138820	1	22	0	50	0.0009507	12	Floodplain	55.9468	0.297915	0.50275	N/A	0.400332	40.0332
4081138850	1	21	0	49	0.0009454	9	Floodplain	30	0.184541	0	N/A	0.0922703	9.22703
4081138950	10	62	0	174	0.0008597	2	Tonle Sap	30.9111	0.00907286	0	0	0.00302429	0.302429
4081138990	13	66	0	181	0.0008947	0	Tonle Sap	100	0.254561	0	N/A	0.12728	12.728
4081139070	1	23	0	57	0.0009804	3	Floodplain	86.6997	0.263067	0.550439	N/A	0.406753	40.6753
4081139080	1	24	0	57	0.0009916	5	Floodplain	32.3031	0.213816	0.0798392	N/A	0.146828	14.6828
4081139130	8	55	2	165	0.000961	0	Tonle Sap	85.6094	0	0	N/A	0	0
4081139140	7	54	0	149	0.0009439	0	Tonle Sap	100	0.627489	0.383137	N/A	0.505313	50.5313
4081139260	8	55	2	165	0.000961	7	Tonle Sap	87.606	0.350836	0.0144051	N/A	0.18262	18.262
4081139270	4	33	1	97	0.0010108	2	Tonle Sap	94	0.894164	0.7668	N/A	0.830482	83.0482
4081139450	26	113	5	329	0.0005815	0	Tonle Sap	52.594	0.152263	0.0951258	0	0.0824631	8.24631
4081139510	17	90	4	264	0.0007801	11	Tonle Sap	20.2569	0.210502	0	N/A	0.105251	10.5251
4081139580	6	38	1	117	0.0010626	1	Tonle Sap	71.2085	0.921276	0.941692	N/A	0.931484	93.1484
4081139660	4	36	1	104	0.0010285	0	Tonle Sap	100	1	1	N/A	1	100
4081139760	2	19	2	51	0.0009851	0	Floodplain	100	0.713656	0.310752	N/A	0.512204	51.2204
4081139870	2	20	1	49	0.0009482	0	Floodplain	100	0.971223	1	N/A	0.985611	98.5611
4081139950	1	23	0	56	0.0009829	0	Floodplain	100	0.239231	N/A	N/A	0.239231	23.9231
4081139970	27	116	3	329	0.0005749	0	Floodplain	100	0	0	0	0	0
4081139980	1	23	0	57	0.0009979	0	Floodplain	88	0	0	N/A	0	0
4081140030	11	56	1	187	0.0009059	0	Floodplain	100	0	0	N/A	0	0
4081140110	23	110	3	309	0.0006554	0	Tonle Sap	100	N/A	0	0	0	0
4081140120	13	86	0	243	0.0007553	0	Tonle Sap	64.9254	0.00778506	0	0	0.00259502	0.259502
4081140150	11	52	0	169	0.0009563	0	Floodplain	79.4671	0.994016	0.990182	N/A	0.992099	99.2099
4081140180	11	54	0	171	0.0009372	0	Floodplain	100	0.663354	0.99526	N/A	0.829307	82.9307
4081140330	3	27	0	77	0.0009259	0	Floodplain	86.5294	0.84158	0.608984	N/A	0.725282	72.5282
4081140380	3	31	0	76	0.0009253	0	Floodplain	78.5138	0.0414465	0.0756903	N/A	0.0585684	5.85684
4081140610	2	21	0	51	0.0009846	3	Floodplain	33	0.40162	0.389267	N/A	0.395443	39.5443
4081140640	2	22	0	54	0.0009903	3	Floodplain	30.2183	0.034278	0.00354782	N/A	0.0189129	1.89129
4081140800	11	54	0	179	0.0009171	6	Floodplain	77.338	0	0	N/A	0	0
4081140900	11	54	0	178	0.0009207	2	Floodplain	64	0	0	N/A	0	0
4081141880	27	115	3	324	0.0006131	0	Floodplain	51.7355	0	0	0	0	0
4081141920	18	86	0	241	0.0007656	1	Floodplain	23.0857	0	0	N/A	0	0
4081142250	11	54	0	175	0.0009199	4	Floodplain	29.9076	0	0	N/A	0	0
4081142310	11	54	0	171	0.0009434	0	Floodplain	95	0	0	N/A	0	0
4081142670	14	76	1	229	0.0008125	2	Tonle Sap	57.5558	0	0	N/A	0	0
4081142680	26	114	5	330	0.000609	0	Tonle Sap	49.01	0	0	0	0	0
4081142910	26	114	5	330	0.0006075	0	Tonle Sap	32	0	0	0	0	0
4081142950	14	76	1	231	0.0008051	8	Tonle Sap	47	0.157841	0	N/A	0.0789204	7.89204
4081143790	27	114	6	344	0.0005871	0	Tonle Sap	33	0	0	0	0	0
4081143810	17	85	2	267	0.0007502	0	Tonle Sap	48.8358	0	0	N/A	0	0
4081144060	27	114	6	344	0.0005871	0	Tonle Sap	100	N/A	0	0	0	0
4081144070	16	85	1	253	0.000756	11	Tonle Sap	22.754	0	0	N/A	0	0
4081144120	4	32	1	86	0.0009877	2	Delta	44.9481	0.999941	0.999951	N/A	0.999946	99.9946
4081144130	4	33	1	94	0.001018	2	Delta	91.2406	0.830211	0.692197	N/A	0.761204	76.1204
4081144860	28	115	6	346	0.0005633	0	Floodplain	42.7734	0	0	0	0	0
4081144880	28	114	6	345	0.000598	0	Tonle Sap	100	0	0	0	0	0
4081145530	4	33	1	96	0.0010354	0	Delta	28.5433	0.300035	0.0734141	N/A	0.186724	18.6724
4081145610	4	30	1	85	0.0010213	1	Delta	97.7923	0.242167	0.138794	N/A	0.19048	19.048
4081146600	23	104	5	333	0.0006463	0	Delta	98.1319	0	N/A	0	0	0
4081146620	18	84	2	258	0.0007579	0	Delta	83.604	0	0	N/A	0	0
4081147060	23	104	5	333	0.0006463	0	Delta	63.8111	N/A	0	0	0	0
4081147130	13	77	2	237	0.0008585	0	Delta	86	0	0	N/A	0	0
4081149870	13	78	2	230	0.000872	3	Delta	39.0143	0.04959	0	N/A	0.024795	2.4795
4081149890	20	103	7	326	0.0007053	0	Delta	79	0	0	0	0	0
4081150200	19	93	5	309	0.000735	0	Delta	21.2377	0	0	N/A	0	0
4081150220	12	68	3	219	0.0009585	0	Delta	64	0	0	N/A	0	0
4081150230	15	91	4	304	0.0007667	0	Delta	100	N/A	0	N/A	0	0
4081150260	12	63	3	200	0.0010066	4	Delta	37	0.0285312	0.0624414	N/A	0.0454863	4.54863
4081150930	15	91	4	304	0.0007667	0	Delta	18.1877	0	0	N/A	0	0
4081150940	16	100	6	334	0.0007091	0	Delta	54.688	0	0	0	0	0
4081151280	16	97	6	325	0.0007645	0	Delta	57.7313	0	0	0	0	0
4081151310	11	75	6	245	0.0009249	0	Delta	79	0	0	N/A	0	0
4081151530	17	98	6	328	0.0007735	0	Delta	83.6475	0	0	0	0	0
4081151550	11	75	6	239	0.0009408	5	Delta	78.0147	0	0	N/A	0	0
4081152160	13	83	8	289	0.0008688	0	Delta	100	0	0	N/A	0	0
4081152170	17	97	9	345	0.0007685	0	Delta	100	0	0	0	0	0
4081152560	1	50	4	167	0.0011316	0	Delta	85.2619	0	0	N/A	0	0
4081152570	1	50	4	167	0.001144	0	Delta	63.5374	0	0	N/A	0	0
4081152760	16	96	8	343	0.0007701	0	Delta	100	0	0	0	0	0
4081152770	14	86	9	300	0.0008556	5	Delta	42.4644	0	0	N/A	0	0
4081153550	1	47	5	149	0.0011824	1	Delta	66.8224	0.0102294	0.00371065	N/A	0.00697004	0.697004
4081153580	1	51	4	159	0.001138	0	Delta	100	0	0	N/A	0	0
4081154080	1	51	4	162	0.0011389	0	Delta	100	0.32057	0	N/A	0.160285	16.0285
4081154100	1	50	4	157	0.0011498	0	Delta	100	0	0	N/A	0	0
4081154300	1	52	5	178	0.0011385	2	Delta	69.4252	0	0	N/A	0	0
4081154320	1	51	5	172	0.0011402	0	Delta	100	0	0	N/A	0	0
4081574290	13	68	0	191	0.0008055	0	Middle Mekong	82.6062	0.391649	0	N/A	0.195824	19.5824
